# Supplementary material for: The Bacterial Communities Associated with Honey Bee (Apis mellifera) Foragers
Source: PLoS One. 2014 Apr 16;9(4):e95056. doi: 10.1371/journal.pone.0095056 (PMC3989306; doi:10.1371/journal.pone.0095056)
Supplement: Table S1 — Barcodes linking the sample types and each individual library to the SRA submission. (XLSX) [file pone.0095056.s002.xlsx]

## Sheet: Sheet1
library name	NCBI run accession	sample description	season	barcode	individual or colony
H3QVG8203.sff	SRR1107954	individual corbicular pollen (2 pollen pellets from the legs of a single forager)	fall	ACGAGTGCGT	individual 1
H3QVG8203.sff	SRR1107954	individual corbicular pollen (2 pollen pellets from the legs of a single forager)	fall	ACGCTCGACA	individual 2
H3QVG8203.sff	SRR1107954	individual corbicular pollen (2 pollen pellets from the legs of a single forager)	fall	AGACGCACTC	individual 3
H3QVG8203.sff	SRR1107954	individual corbicular pollen (2 pollen pellets from the legs of a single forager)	fall	AGCACTGTAG	individual 4
H3QVG8203.sff	SRR1107954	individual corbicular pollen (2 pollen pellets from the legs of a single forager)	fall	ATCAGACACG	individual 5
H3QVG8203.sff	SRR1107954	individual corbicular pollen (2 pollen pellets from the legs of a single forager)	fall	ATATCGCGAG	individual 6
H3QVG8203.sff	SRR1107954	individual corbicular pollen (2 pollen pellets from the legs of a single forager)	fall	CGTGTCTCTA	individual 7
H3QVG8203.sff	SRR1107954	individual corbicular pollen (2 pollen pellets from the legs of a single forager)	fall	CTCGCGTGTC	individual 8
H3QVG8203.sff	SRR1107954	individual corbicular pollen (2 pollen pellets from the legs of a single forager)	fall	TAGTATCAGC	individual 9
H3QVG8203.sff	SRR1107954	individual corbicular pollen (2 pollen pellets from the legs of a single forager)	fall	TCTCTATGCG	individual 10
H3QVG8203.sff	SRR1107954	individual corbicular pollen (2 pollen pellets from the legs of a single forager)	fall	TGATACGTCT	individual 11
H3QVG8203.sff	SRR1107954	individual corbicular pollen (2 pollen pellets from the legs of a single forager)	fall	TACTGAGCTA	individual 12
H3QVG8203.sff	SRR1107954	individual corbicular pollen (2 pollen pellets from the legs of a single forager)	fall	CATAGTAGTG	individual 13
H3QVG8203.sff	SRR1107954	individual corbicular pollen (2 pollen pellets from the legs of a single forager)	fall	CGAGAGATAC	individual 14
H3QVG8204.sff	SRR1107957	forager gut corresponding to corbicular pollen run accession SRR1107954, individual 1	fall	ACGAGTGCGT	individual 1
H3QVG8204.sff	SRR1107957	forager gut corresponding to corbicular pollen run accession SRR1107954, individual 2	fall	ACGCTCGACA	individual 2
H3QVG8204.sff	SRR1107957	forager gut corresponding to corbicular pollen run accession SRR1107954, individual 3	fall	AGACGCACTC	individual 3
H3QVG8204.sff	SRR1107957	forager gut corresponding to corbicular pollen run accession SRR1107954, individual 4	fall	AGCACTGTAG	individual 4
H3QVG8204.sff	SRR1107957	forager gut corresponding to corbicular pollen run accession SRR1107954, individual 5	fall	ATCAGACACG	individual 5
H3QVG8204.sff	SRR1107957	forager gut corresponding to corbicular pollen run accession SRR1107954, individual 6	fall	ATATCGCGAG	individual 6
H3QVG8204.sff	SRR1107957	forager gut corresponding to corbicular pollen run accession SRR1107954, individual 7	fall	CGTGTCTCTA	individual 7
H3QVG8204.sff	SRR1107957	forager gut corresponding to corbicular pollen run accession SRR1107954, individual 8	fall	CTCGCGTGTC	individual 8
H3QVG8204.sff	SRR1107957	forager gut corresponding to corbicular pollen run accession SRR1107954, individual 9	fall	TAGTATCAGC	individual 9
H3QVG8204.sff	SRR1107957	forager gut corresponding to corbicular pollen run accession SRR1107954, individual 10	fall	TCTCTATGCG	individual 10
H3QVG8204.sff	SRR1107957	forager gut corresponding to corbicular pollen run accession SRR1107954, individual 11	fall	TGATACGTCT	individual 11
H3QVG8204.sff	SRR1107957	forager gut corresponding to corbicular pollen run accession SRR1107954, individual 12	fall	TACTGAGCTA	individual 12
H3QVG8204.sff	SRR1107957	forager gut corresponding to corbicular pollen run accession SRR1107954, individual 13	fall	CATAGTAGTG	individual 13
H3QVG8204.sff	SRR1107957	forager gut corresponding to corbicular pollen run accession SRR1107954, individual 14	fall	CGAGAGATAC	individual 14
ICM3C9K01.sff	SRR1107640	forager gut corresponding to corbicular pollen run accession SRR1107850, individual 1	spring	ACGAGTGCGT	individual 1
ICM3C9K01.sff	SRR1107640	forager gut corresponding to corbicular pollen run accession SRR1107850, individual 2	spring	ACGCTCGACA	individual 2
ICM3C9K01.sff	SRR1107640	forager gut corresponding to corbicular pollen run accession SRR1107850, individual 3	spring	AGACGCACTC	individual 3
ICM3C9K01.sff	SRR1107640	forager gut corresponding to corbicular pollen run accession SRR1107850, individual 4	spring	AGCACTGTAG	individual 4
ICM3C9K01.sff	SRR1107640	forager gut corresponding to corbicular pollen run accession SRR1107850, individual 5	spring	ATCAGACACG	individual 5
ICM3C9K01.sff	SRR1107640	forager gut corresponding to corbicular pollen run accession SRR1107850, individual 6	spring	ATATCGCGAG	individual 6
ICM3C9K01.sff	SRR1107640	forager gut corresponding to corbicular pollen run accession SRR1107850, individual 7	spring	CGTGTCTCTA	individual 7
ICM3C9K01.sff	SRR1107640	forager gut corresponding to corbicular pollen run accession SRR1107850, individual 8	spring	CTCGCGTGTC	individual 8
ICM3C9K01.sff	SRR1107640	forager gut corresponding to corbicular pollen run accession SRR1107850, individual 9	spring	TAGTATCAGC	individual 9
ICM3C9K01.sff	SRR1107640	forager gut corresponding to corbicular pollen run accession SRR1107850, individual 10	spring	TCTCTATGCG	individual 10
ICM3C9K01.sff	SRR1107640	forager gut corresponding to corbicular pollen run accession SRR1107850, individual 11	spring	TGATACGTCT	individual 11
ICM3C9K01.sff	SRR1107640	forager gut corresponding to corbicular pollen run accession SRR1107850, individual 12	spring	TACTGAGCTA	individual 12
ICM3C9K01.sff	SRR1107640	forager gut corresponding to corbicular pollen run accession SRR1107850, individual 13	spring	CATAGTAGTG	individual 13
ICM3C9K01.sff	SRR1107640	forager gut corresponding to corbicular pollen run accession SRR1107850, individual 14	spring	CGAGAGATAC	individual 14
ICM3C9K02.sff	SRR1107850	individual corbicular pollen (2 pollen pellets from the legs of a single forager)	spring	ACGAGTGCGT	individual 1
ICM3C9K02.sff	SRR1107850	individual corbicular pollen (2 pollen pellets from the legs of a single forager)	spring	ACGCTCGACA	individual 2
ICM3C9K02.sff	SRR1107850	individual corbicular pollen (2 pollen pellets from the legs of a single forager)	spring	AGACGCACTC	individual 3
ICM3C9K02.sff	SRR1107850	individual corbicular pollen (2 pollen pellets from the legs of a single forager)	spring	AGCACTGTAG	individual 4
ICM3C9K02.sff	SRR1107850	individual corbicular pollen (2 pollen pellets from the legs of a single forager)	spring	ATCAGACACG	individual 5
ICM3C9K02.sff	SRR1107850	individual corbicular pollen (2 pollen pellets from the legs of a single forager)	spring	ATATCGCGAG	individual 6
ICM3C9K02.sff	SRR1107850	individual corbicular pollen (2 pollen pellets from the legs of a single forager)	spring	CGTGTCTCTA	individual 7
ICM3C9K02.sff	SRR1107850	individual corbicular pollen (2 pollen pellets from the legs of a single forager)	spring	CTCGCGTGTC	individual 8
ICM3C9K02.sff	SRR1107850	individual corbicular pollen (2 pollen pellets from the legs of a single forager)	spring	TAGTATCAGC	individual 9
ICM3C9K02.sff	SRR1107850	individual corbicular pollen (2 pollen pellets from the legs of a single forager)	spring	TCTCTATGCG	individual 10
ICM3C9K02.sff	SRR1107850	individual corbicular pollen (2 pollen pellets from the legs of a single forager)	spring	TGATACGTCT	individual 11
ICM3C9K02.sff	SRR1107850	individual corbicular pollen (2 pollen pellets from the legs of a single forager)	spring	TACTGAGCTA	individual 12
ICM3C9K02.sff	SRR1107850	individual corbicular pollen (2 pollen pellets from the legs of a single forager)	spring	CATAGTAGTG	individual 13
ICM3C9K02.sff	SRR1107850	individual corbicular pollen (2 pollen pellets from the legs of a single forager)	spring	CGAGAGATAC	individual 14
ICM3C9K03.sff	SRR1107851	pooled crops from foragers (15 pooled crops from foragers returning to one colony)	spring	ACGAGTGCGT	colony 1
ICM3C9K03.sff	SRR1107851	pooled crops from foragers (15 pooled crops from foragers returning to one colony)	spring	ACGCTCGACA	colony 2
ICM3C9K03.sff	SRR1107851	pooled crops from foragers (15 pooled crops from foragers returning to one colony)	spring	AGACGCACTC	colony 3
ICM3C9K03.sff	SRR1107851	pooled crops from foragers (15 pooled crops from foragers returning to one colony)	spring	AGCACTGTAG	colony 4
ICM3C9K03.sff	SRR1107851	pooled crops from foragers (15 pooled crops from foragers returning to one colony)	spring	ATCAGACACG	colony 5
ICM3C9K03.sff	SRR1107851	pooled crops from foragers (15 pooled crops from foragers returning to one colony)	spring	ATATCGCGAG	colony 6
ICM3C9K03.sff	SRR1107851	pooled crops from foragers (15 pooled crops from foragers returning to one colony)	spring	CGTGTCTCTA	colony 7
ICM3C9K03.sff	SRR1107851	pooled crops from foragers (15 pooled crops from foragers returning to one colony)	spring	CTCGCGTGTC	colony 8
ICM3C9K03.sff	SRR1107851	pooled crops from foragers (15 pooled crops from foragers returning to one colony)	spring	TAGTATCAGC	colony 9
ICM3C9K03.sff	SRR1107851	pooled crops from foragers (15 pooled crops from foragers returning to one colony)	spring	TCTCTATGCG	colony 10
ICM3C9K03.sff	SRR1107851	pooled crops from foragers (15 pooled crops from foragers returning to one colony)	spring	TGATACGTCT	colony 11
ICM3C9K03.sff	SRR1107851	pooled crops from foragers (15 pooled crops from foragers returning to one colony)	spring	TACTGAGCTA	colony 12
ICM3C9K03.sff	SRR1107851	pooled crops from foragers (15 pooled crops from foragers returning to one colony)	spring	CATAGTAGTG	colony 13
ICM3C9K03.sff	SRR1107851	pooled crops from foragers (15 pooled crops from foragers returning to one colony)	spring	CGAGAGATAC	colony 14
ICM3C9K04.sff	SRR1107852	pooled corbicular pollen (30 pollen pellets from the legs of 15 foragers corresponding to run accession SRR1107851, colony 1)	spring	ACGAGTGCGT	colony 1
ICM3C9K04.sff	SRR1107852	pooled corbicular pollen (30 pollen pellets from the legs of 15 foragers corresponding to run accession SRR1107851, colony 2)	spring	ACGCTCGACA	colony 2
ICM3C9K04.sff	SRR1107852	pooled corbicular pollen (30 pollen pellets from the legs of 15 foragers corresponding to run accession SRR1107851, colony 3)	spring	AGACGCACTC	colony 3
ICM3C9K04.sff	SRR1107852	pooled corbicular pollen (30 pollen pellets from the legs of 15 foragers corresponding to run accession SRR1107851, colony 4)	spring	AGCACTGTAG	colony 4
ICM3C9K04.sff	SRR1107852	pooled corbicular pollen (30 pollen pellets from the legs of 15 foragers corresponding to run accession SRR1107851, colony 5)	spring	ATCAGACACG	colony 5
ICM3C9K04.sff	SRR1107852	pooled corbicular pollen (30 pollen pellets from the legs of 15 foragers corresponding to run accession SRR1107851, colony 6)	spring	ATATCGCGAG	colony 6
ICM3C9K04.sff	SRR1107852	pooled corbicular pollen (30 pollen pellets from the legs of 15 foragers corresponding to run accession SRR1107851, colony 7)	spring	CGTGTCTCTA	colony 7
ICM3C9K04.sff	SRR1107852	pooled corbicular pollen (30 pollen pellets from the legs of 15 foragers corresponding to run accession SRR1107851, colony 8)	spring	CTCGCGTGTC	colony 8
ICM3C9K04.sff	SRR1107852	pooled corbicular pollen (30 pollen pellets from the legs of 15 foragers corresponding to run accession SRR1107851, colony 9)	spring	TAGTATCAGC	colony 9
ICM3C9K04.sff	SRR1107852	pooled corbicular pollen (30 pollen pellets from the legs of 15 foragers corresponding to run accession SRR1107851, colony 10)	spring	TCTCTATGCG	colony 10
ICM3C9K04.sff	SRR1107852	pooled corbicular pollen (30 pollen pellets from the legs of 15 foragers corresponding to run accession SRR1107851, colony 11)	spring	TGATACGTCT	colony 11
ICM3C9K04.sff	SRR1107852	pooled corbicular pollen (30 pollen pellets from the legs of 15 foragers corresponding to run accession SRR1107851, colony 12)	spring	TACTGAGCTA	colony 12
ICM3C9K04.sff	SRR1107852	pooled corbicular pollen (30 pollen pellets from the legs of 15 foragers corresponding to run accession SRR1107851, colony 13)	spring	CATAGTAGTG	colony 13
ICM3C9K04.sff	SRR1107852	pooled corbicular pollen (30 pollen pellets from the legs of 15 foragers corresponding to run accession SRR1107851, colony 14)	spring	CGAGAGATAC	colony 14
