# Supplementary material for: The Bacterial Communities Associated with Honey Bee (Apis mellifera) Foragers
Source: PLoS One. 2014 Apr 16;9(4):e95056. doi: 10.1371/journal.pone.0095056 (PMC3989306; doi:10.1371/journal.pone.0095056)
Supplement: Table S2 — Number of sequences in each of the 812 OTUs found in guts, crops, and corbicular pollen samples. (XLSX) [file pone.0095056.s003.xlsx]

## Sheet: Sheet1
						** Library labels were switched for the fall gut and fall corbicular pollen samples. Therefore, the fall libraries labeled with "CP" actually represent guts, not corbicular pollen and vice versa. Please note this if these libraries are downloaded from the NCBI SRA for analysis.						season	fall	fall	fall	fall	fall	fall	fall	fall	fall	fall	fall	fall	fall	fall	fall	fall	fall	fall	fall	fall	fall	fall	fall	fall	fall	fall	fall	fall	spring	spring	spring	spring	spring	spring	spring	spring	spring
												Colony	19	19	19	19	19	19	19	19	19	19	19	19	19	19	19	19	19	19	19	19	19	19	19	19	19	19	19	19	packages	packages	packages	packages	packages	packages	packages	packages	packages
												Material	gut	gut	gut	gut	gut	gut	gut	gut	gut	gut	gut	gut	gut	gut	corbicular pollen	corbicular pollen	corbicular pollen	corbicular pollen	corbicular pollen	corbicular pollen	corbicular pollen	corbicular pollen	corbicular pollen	corbicular pollen	corbicular pollen	corbicular pollen	corbicular pollen	corbicular pollen	corbicular pollen	corbicular pollen	corbicular pollen	corbicular pollen	corbicular pollen	corbicular pollen	corbicular pollen	corbicular pollen	corbicular pollen
RDP classifier result	GI	BLAST result (e-10)										Library label **	19.7.CP.1	19.7.CP.10	19.7.CP.11	19.7.CP.12	19.7.CP.13	19.7.CP.14	19.7.CP.2	19.7.CP.3	19.7.CP.4	19.7.CP.5	19.7.CP.6	19.7.CP.7	19.7.CP.8	19.7.CP.9	19.7.F.1	19.7.F.10	19.7.F.11	19.7.F.12	19.7.F.13	19.7.F.14	19.7.F.2	19.7.F.3	19.7.F.4	19.7.F.5	19.7.F.6	19.7.F.7	19.7.F.8	19.7.F.9	post.Fcp.1	post.Fcp.10	post.Fcp.11	post.Fcp.12	post.Fcp.13	post.Fcp.14	post.Fcp.2	post.Fcp.3	post.Fcp.4
												individual (for linking to Figures 3 and 4)	1	2	3	4	5	6	7	8	9	10	11	12	13	14	1	2	3	4	5	6	7	8	9	10	11	12	13	14	1	2	3	4	5	6	7	8	9
			abbreviated taxonomy (for linking to figures 2, 3, and S2)	representative sequence for OTU	OTU name	# seqs in OTU across libraries	# seqs in OTU in fall guts	# seqs in OTU in fall cp	# seqs in OTU in spring guts	# seqs in OTU in spring cp	# seqs in OTU in spring crops (pooled)	# seqs in OTU in spring cp (pooled)
Bacteria(100);Firmicutes(100);Bacilli(100);Lactobacillales(100);Lactobacillaceae(96);Lactobacillus(95);unclassified;	AB810033	Lactobacillus sp. AcjLac12 gene for 16S ribosomal RNA, partial sequence	Lactobacillus sp.	ICM3C9K02C1FKZ	Otu001	50452	132	0	139	740	49380	61	7	0	3	0	0	2	87	1	11	4	11	0	6	0	0	0	0	0	0	0	0	0	0	0	0	0	0	0	54	11	59	0	188	21	29	3	141
Bacteria(100);Proteobacteria(100);Gammaproteobacteria(100);Pseudomonadales(100);Pseudomonadaceae(100);Pseudomonas(100);unclassified;	KF021824	Pseudomonas sp. H-144 16S ribosomal RNA gene, partial sequence	Gammaproteobacteria	ICM3C9K02DI0CB	Otu002	880	1	227	0	630	18	4	0	0	1	0	0	0	0	0	0	0	0	0	0	0	0	0	3	0	0	53	36	32	18	18	0	38	27	2	59	33	32	0	48	17	36	7	228
Bacteria(100);Proteobacteria(100);Gammaproteobacteria(100);Enterobacteriales(100);Enterobacteriaceae(100);Escherichia(97);unclassified(97);	CP006250	Serratia plymuthica 4Rx13, complete genome	Enterobacteriaceae	ICM3C9K02C0RCX	Otu003	771	209	227	0	295	36	4	0	0	0	0	0	4	204	0	0	1	0	0	0	0	2	4	9	0	1	18	61	84	0	2	0	17	28	1	31	19	12	0	18	15	36	2	71
Bacteria(100);Proteobacteria(100);Gammaproteobacteria(100);Pseudomonadales(100);Moraxellaceae(100);Acinetobacter(100);Acinetobacter_johnsonii(91);	KF021714	Acinetobacter sp. H-25 16S ribosomal RNA gene, partial sequence	Gammaproteobacteria	ICM3C9K02DCE11	Otu004	784	2	424	0	319	34	5	0	0	0	0	0	0	1	0	0	0	0	0	1	0	1	11	0	0	4	44	6	318	17	6	3	2	11	1	55	17	5	0	20	12	48	3	60
Bacteria(100);Actinobacteria(100);Actinobacteria(100);Actinomycetales(100);unclassified;unclassified;unclassified;	KF030216	Corynebacterium canis strain OH2010 16S ribosomal RNA gene, partial sequence	Actinomycetales	ICM3C9K02DSM2N	Otu005	5318	0	2953	2	823	218	1322	0	0	0	0	0	0	0	0	0	0	0	0	0	0	193	62	23	0	411	656	37	238	28	62	23	8	1180	32	21	167	7	0	56	13	49	13	98
Bacteria(100);Actinobacteria(100);Actinobacteria(100);Actinomycetales(100);Propionibacteriaceae(98);Propionibacterium(98);Propionibacterium_acnes(98);	KC874294	Uncultured bacterium clone S72_049 16S ribosomal RNA gene, partial sequence	Actinomycetales	ICM3C9K02DTS6R	Otu006	508	2	397	0	89	15	5	0	0	2	0	0	0	0	0	0	0	0	0	0	0	11	1	11	0	3	48	3	108	106	10	2	30	62	2	22	9	4	0	5	5	8	1	4
Bacteria(100);Firmicutes(100);Bacilli(100);Bacillales(100);Paenibacillaceae_2(82);Aneurinibacillus(82);unclassified;	JX535563	Aneurinibacillus aneurinilyticus strain y170 16S ribosomal RNA gene, partial sequence	Firmicutes	ICM3C9K02C82IU	Otu007	147	0	0	0	136	11	0	0	0	0	0	0	0	0	0	0	0	0	0	0	0	0	0	0	0	0	0	0	0	0	0	0	0	0	0	15	3	5	0	12	10	6	1	41
Bacteria(100);Proteobacteria(100);Alphaproteobacteria(100);Rhodospirillales(100);Acetobacteraceae(100);Saccharibacter(91);Alpha2.2(91);	DQ837625	Uncultured firmicute clone HBG_B2V6-3 16S ribosomal RNA gene, partial sequence	Alpha 2.2	ICM3C9K02D85ZJ	Otu008	40658	109	1016	113	153	39235	32	2	9	4	0	9	3	12	2	3	20	37	5	2	1	2	31	25	0	148	69	3	59	17	556	43	24	30	9	12	1	14	0	40	9	8	5	0
Bacteria(100);Proteobacteria(100);Alphaproteobacteria(100);Rhizobiales(100);Bradyrhizobiaceae(96);Balneimonas(95);unclassified(95);	JX100170	Uncultured bacterium clone HLLHb283 16S ribosomal RNA gene, partial sequence	Alphaproteobacteria	ICM3C9K02EMF1J	Otu009	575	0	414	0	83	11	67	0	0	0	0	0	0	0	0	0	0	0	0	0	0	11	5	1	0	8	216	10	19	41	8	1	50	44	0	11	7	8	0	7	2	2	0	23
Bacteria(100);Proteobacteria(100);Alphaproteobacteria(100);Caulobacterales(100);Caulobacteraceae(100);Caulobacter(99);unclassified(99);	KC607409	Uncultured bacterium clone CarbonSeq02b_030410_H03 16S ribosomal RNA gene, partial sequence	Alphaproteobacteria	ICM3C9K02EOYHA	Otu010	665	1	634	0	26	4	0	0	0	0	0	0	0	0	1	0	0	0	0	0	0	16	7	26	0	56	76	4	50	12	5	3	60	312	7	5	2	4	0	0	2	8	1	1
Bacteria(100);Acidobacteria(100);unclassified;unclassified;unclassified;unclassified;unclassified;	JX574776	Bacterium enrichment culture clone SC-1_6 16S ribosomal RNA gene, partial sequence	other	ICM3C9K02DLD2M	Otu011	3	0	0	0	3	0	0	0	0	0	0	0	0	0	0	0	0	0	0	0	0	0	0	0	0	0	0	0	0	0	0	0	0	0	0	3	0	0	0	0	0	0	0	0
Bacteria(100);Proteobacteria(100);Alphaproteobacteria(100);Rhizobiales(100);Phyllobacteriaceae(99);Mesorhizobium(99);unclassified(99);	KF150431	Mesorhizobium plurifarium strain JN192 16S ribosomal RNA gene, partial sequence	Alphaproteobacteria	ICM3C9K02C73R7	Otu012	73	0	30	0	38	5	0	0	0	0	0	0	0	0	0	0	0	0	0	0	0	1	0	0	0	0	4	8	0	7	0	1	2	7	0	8	1	0	0	5	7	1	0	4
Bacteria(100);Proteobacteria(100);Betaproteobacteria(100);Neisseriales(100);Neisseriaceae(100);Beta(100);unclassified;	KC477411	Uncultured Candidatus Snodgrassella sp. clone BtBU5 16S ribosomal RNA gene, partial sequence	Snodgrassella sp.	ICM3C9K02C1XQY	Otu013	59928	27553	247	22453	96	9573	6	149	968	1624	0	457	171	355	2345	6044	1811	611	11532	1355	131	4	5	25	0	13	3	14	22	14	1	0	145	1	0	2	39	4	0	4	7	10	0	3
Bacteria(100);Proteobacteria(100);Alphaproteobacteria(100);Rhodospirillales(100);Acetobacteraceae(100);Roseomonas(99);unclassified;	KC866225	Roseomonas mucosa strain Melo31 16S ribosomal RNA gene, partial sequence	Acetobacteraceae	ICM3C9K02C42NC	Otu014	13	0	11	0	2	0	0	0	0	0	0	0	0	0	0	0	0	0	0	0	0	0	0	0	0	0	0	0	4	0	0	0	0	7	0	1	0	0	0	0	0	0	0	0
Bacteria(100);Actinobacteria(100);Actinobacteria(100);Actinomycetales(100);Micrococcaceae(87);unclassified;unclassified;	KF030221	Micrococcus luteus strain OH4847 16S ribosomal RNA gene, partial sequence	Actinomycetales	ICM3C9K02DL9S0	Otu015	80	0	54	0	21	1	4	0	0	0	0	0	0	0	0	0	0	0	0	0	0	2	0	1	0	10	10	1	13	7	2	0	8	0	0	4	1	0	0	1	0	2	0	11
Bacteria(100);Firmicutes(100);Bacilli(100);Bacillales(100);Planococcaceae(100);Planomicrobium(100);unclassified(100);	JQ762282	Planococcus sp. NEAU-ST10-9 16S ribosomal RNA gene, partial sequence	Firmicutes	ICM3C9K02D7R9G	Otu016	138	0	115	0	15	2	6	0	0	0	0	0	0	0	0	0	0	0	0	0	0	0	6	3	0	1	34	13	1	5	5	0	12	35	0	1	1	0	0	3	0	0	0	4
Bacteria(100);Proteobacteria(100);Betaproteobacteria(100);Burkholderiales(100);Comamonadaceae(100);Acidovorax(93);unclassified;	KC516491	Uncultured Acidovorax sp. clone MRS4-176 16S ribosomal RNA gene, partial sequence	other	ICM3C9K02D6QVG	Otu017	2	0	1	0	1	0	0	0	0	0	0	0	0	0	0	0	0	0	0	0	0	0	0	0	0	0	1	0	0	0	0	0	0	0	0	1	0	0	0	0	0	0	0	0
Bacteria(100);Firmicutes(100);Bacilli(100);Bacillales(100);Bacillaceae(89);Bacillus(87);Bacillus_flexus(83);	KF150411	Bacillus aryabhattai strain JN162 16S ribosomal RNA gene, partial sequence	Firmicutes	ICM3C9K02EWR38	Otu018	5	0	3	0	1	1	0	0	0	0	0	0	0	0	0	0	0	0	0	0	0	0	0	0	0	0	0	1	0	0	2	0	0	0	0	1	0	0	0	0	0	0	0	0
Bacteria(100);Bacteroidetes(100);Sphingobacteria(100);Sphingobacteriales(100);Flexibacteraceae(100);Hymenobacter(100);unclassified(100);	JQ627492	Uncultured Bacteroidetes bacterium clone B1_7_1B_113 small subunit ribosomal RNA gene, partial sequence	other	ICM3C9K02EIUNF	Otu019	1	0	0	0	1	0	0	0	0	0	0	0	0	0	0	0	0	0	0	0	0	0	0	0	0	0	0	0	0	0	0	0	0	0	0	1	0	0	0	0	0	0	0	0
Bacteria(100);Firmicutes(100);Clostridia(100);Clostridiales(100);Veillonellaceae(99);Veillonella(99);Veillonella_parvula(98);	KC676155	Uncultured Veillonella sp. clone 5H036 16S ribosomal RNA gene, partial sequence	Firmicutes	ICM3C9K02D0LN5	Otu020	2	1	0	0	1	0	0	0	0	1	0	0	0	0	0	0	0	0	0	0	0	0	0	0	0	0	0	0	0	0	0	0	0	0	0	1	0	0	0	0	0	0	0	0
Bacteria(100);Proteobacteria(100);Alphaproteobacteria(100);Rhizobiales(100);Bartonellaceae(100);Bartonella(100);Alpha1(100);	HE661027	Uncultured bacterium partial 16S rRNA gene, clone 4528	Alpha 1	ICM3C9K02DLAED	Otu021	2263	1527	0	261	2	472	1	37	33	0	0	51	207	1	13	0	1147	2	0	21	15	0	0	0	0	0	0	0	0	0	0	0	0	0	0	1	1	0	0	0	0	0	0	0
Bacteria(100);Proteobacteria(100);Betaproteobacteria(100);Burkholderiales(83);unclassified;unclassified;unclassified;	KC606065	Uncultured bacterium clone CarbonSeq005_022210_4666 16S ribosomal RNA gene, partial sequence	other	ICM3C9K02DZ5OS	Otu022	39	0	32	0	4	0	3	0	0	0	0	0	0	0	0	0	0	0	0	0	0	0	0	0	0	0	24	0	0	0	4	0	4	0	0	1	0	0	0	0	0	0	0	1
Bacteria(100);Bacteroidetes(100);Flavobacteria(100);Flavobacteriales(100);Flavobacteriaceae(100);unclassified;unclassified;	KC836012	Uncultured bacterium clone C-93 16S ribosomal RNA gene, partial sequence	other	ICM3C9K02DVT8C	Otu023	64	0	55	0	9	0	0	0	0	0	0	0	0	0	0	0	0	0	0	0	0	0	2	0	0	4	10	6	22	0	4	0	0	7	0	7	0	0	0	0	1	0	0	0
Bacteria(100);Proteobacteria(100);Betaproteobacteria(100);Burkholderiales(100);Comamonadaceae(98);Delftia(85);unclassified(85);	KC873150	Uncultured bacterium clone S42_072 16S ribosomal RNA gene, partial sequence	other	ICM3C9K02C5XI7	Otu024	26	0	14	0	5	6	1	0	0	0	0	0	0	0	0	0	0	0	0	0	0	0	0	0	0	7	0	0	0	0	0	0	0	7	0	1	0	0	0	0	0	2	0	0
Bacteria(100);Cyanobacteria(100);4C0d-2(100);mle1-12(100);unclassified(100);unclassified(100);unclassified(100);	JX109306	Uncultured bacterium clone MID38_39127 16S ribosomal RNA gene, partial sequence	other	ICM3C9K02C7KTI	Otu025	28	0	23	0	5	0	0	0	0	0	0	0	0	0	0	0	0	0	0	0	0	2	1	0	0	1	1	0	1	0	0	0	4	13	0	1	0	0	0	0	0	0	1	0
Bacteria(100);Proteobacteria(100);Alphaproteobacteria(98);Sphingomonadales(96);unclassified;unclassified;unclassified;	KF037874	Uncultured bacterium clone YF706 16S ribosomal RNA gene, partial sequence	Alphaproteobacteria	ICM3C9K02C9IRT	Otu026	1	0	0	0	1	0	0	0	0	0	0	0	0	0	0	0	0	0	0	0	0	0	0	0	0	0	0	0	0	0	0	0	0	0	0	1	0	0	0	0	0	0	0	0
Bacteria(100);Proteobacteria(100);Gammaproteobacteria(100);Enterobacteriales(100);Enterobacteriaceae(100);unclassified;unclassified;	HF947094	Uncultured Enterobacteriaceae bacterium partial 16S rRNA gene, clone B5	Enterobacteriaceae	ICM3C9K02DTVGR	Otu027	8886	369	8384	0	17	76	40	0	0	0	0	20	332	7	0	0	0	4	1	3	2	2	3	1452	0	388	23	7	660	35	0	0	34	5780	0	1	4	0	0	0	0	0	0	7
Bacteria(100);Bacteroidetes(100);Flavobacteria(98);Flavobacteriales(98);Flavobacteriaceae(98);Wautersiella(80);Wautersiella_falsenii(80);	KC845232	Flavobacterium sp. 7.51 16S ribosomal RNA gene, partial sequence	other	ICM3C9K02D5OYX	Otu028	1	0	0	0	1	0	0	0	0	0	0	0	0	0	0	0	0	0	0	0	0	0	0	0	0	0	0	0	0	0	0	0	0	0	0	1	0	0	0	0	0	0	0	0
Bacteria(100);Actinobacteria(100);Actinobacteria(100);Actinomycetales(100);Geodermatophilaceae(98);Geodermatophilus(94);unclassified(88);	KC447489	Uncultured actinobacterium clone RLBp669 16S ribosomal RNA gene, partial sequence	Actinomycetales	ICM3C9K02D4QFH	Otu029	11	0	8	0	2	0	1	0	0	0	0	0	0	0	0	0	0	0	0	0	0	0	0	0	0	0	0	0	3	0	1	0	0	4	0	1	0	0	0	0	0	0	0	0
Bacteria(100);Acidobacteria(100);unclassified;unclassified;unclassified;unclassified;unclassified;	JQ381920	Uncultured bacterium clone WIR21Fasth6_3956 16S ribosomal RNA gene, partial sequence	other	ICM3C9K02DP0V7	Otu030	514	2	497	0	9	6	0	0	0	1	0	0	1	0	0	0	0	0	0	0	0	3	6	40	0	76	59	6	33	30	12	7	44	179	2	1	0	0	0	2	1	1	0	1
Bacteria(100);Actinobacteria(100);Actinobacteria(100);Actinomycetales(100);unclassified;unclassified;unclassified;	JX635174	Uncultured bacterium clone G8XQE6O04JMZVM 16S ribosomal RNA gene, partial sequence	Actinomycetales	ICM3C9K02D37TQ	Otu031	7	0	5	0	2	0	0	0	0	0	0	0	0	0	0	0	0	0	0	0	0	0	0	0	0	0	0	0	0	0	4	1	0	0	0	1	0	0	0	0	0	0	0	1
Bacteria(100);Actinobacteria(100);Actinobacteria(100);Actinomycetales(100);Pseudonocardiaceae(84);Pseudonocardia(82);unclassified(82);	KF037702	Uncultured bacterium clone YL809 16S ribosomal RNA gene, partial sequence	Actinomycetales	ICM3C9K02DA3A3	Otu032	10	0	8	0	2	0	0	0	0	0	0	0	0	0	0	0	0	0	0	0	0	0	0	0	0	0	3	1	0	2	0	0	2	0	0	1	0	0	0	0	0	0	0	1
Bacteria(100);Proteobacteria(100);Betaproteobacteria(100);Burkholderiales(99);unclassified;unclassified;unclassified;	KC625060	Uncultured bacterium clone T2S202D10 16S ribosomal RNA gene, partial sequence	other	ICM3C9K02C76N9	Otu033	8	0	1	0	5	2	0	0	0	0	0	0	0	0	0	0	0	0	0	0	0	0	0	0	0	0	0	0	1	0	0	0	0	0	0	0	4	0	0	0	0	1	0	0
Bacteria(100);Proteobacteria(100);Alphaproteobacteria(100);Rhizobiales(96);unclassified;unclassified;unclassified;	JX522918	Uncultured bacterium clone F16 16S ribosomal RNA gene, partial sequence	Alphaproteobacteria	ICM3C9K02DU4C6	Otu034	2	0	0	0	2	0	0	0	0	0	0	0	0	0	0	0	0	0	0	0	0	0	0	0	0	0	0	0	0	0	0	0	0	0	0	0	2	0	0	0	0	0	0	0
Bacteria(100);Firmicutes(100);Bacilli(100);Bacillales(100);unclassified;unclassified;unclassified;	KC914390	Geobacillus sp. CDB3 16S ribosomal RNA gene, partial sequence	Firmicutes	ICM3C9K02D9A00	Otu035	20	0	13	0	4	2	1	0	0	0	0	0	0	0	0	0	0	0	0	0	0	1	0	2	0	4	1	0	0	0	0	2	0	2	1	0	2	0	0	1	0	0	0	1
Bacteria(100);Firmicutes(100);Bacilli(100);Lactobacillales(100);Lactobacillaceae(100);Lactobacillus(100);Firm5(100);	KC354363	Uncultured Lactobacillus sp. clone G4SXT0Z01AYJLY 16S ribosomal RNA gene, partial sequence	Firm 5	ICM3C9K02ELPTT	Otu036	28726	14951	0	12485	17	1271	2	2571	688	983	0	44	1062	1793	1047	1602	363	682	956	109	3051	0	0	0	0	0	0	0	0	0	0	0	0	0	0	0	3	2	0	1	1	2	0	4
Bacteria(100);Proteobacteria(100);Alphaproteobacteria(100);Sphingomonadales(100);Sphingomonadaceae(100);Sphingomonas(90);unclassified;	KC607394	Uncultured bacterium clone CarbonSeq010_021110_G03 16S ribosomal RNA gene, partial sequence	Alphaproteobacteria	ICM3C9K02DEMRG	Otu037	21	0	4	0	9	8	0	0	0	0	0	0	0	0	0	0	0	0	0	0	0	0	2	0	0	1	0	0	1	0	0	0	0	0	0	0	1	0	0	0	0	0	0	5
Bacteria(100);Firmicutes(100);Bacilli(100);Bacillales(100);unclassified;unclassified;unclassified;	KF030228	Bacillus circulans strain OH3087 16S ribosomal RNA gene, partial sequence	Firmicutes	ICM3C9K02D7097	Otu038	139	0	121	0	12	0	6	0	0	0	0	0	0	0	0	0	0	0	0	0	0	1	2	2	0	6	33	8	0	1	16	3	15	34	0	1	1	0	0	3	0	0	1	4
Bacteria(100);Proteobacteria(100);Betaproteobacteria(100);Burkholderiales(100);Burkholderiaceae(95);Burkholderia(94);unclassified;	JQ973321	Uncultured bacterium clone ZC15 16S ribosomal RNA gene, partial sequence	other	ICM3C9K02CZJQZ	Otu039	204	1	148	0	47	6	2	0	0	0	0	0	0	1	0	0	0	0	0	0	0	8	0	6	0	4	8	2	5	24	3	1	15	72	0	3	3	1	0	11	4	2	1	7
Bacteria(100);Bacteroidetes(100);Sphingobacteria(100);Sphingobacteriales(100);Chitinophagaceae(100);Flavisolibacter(100);unclassified(100);	JN030442	Uncultured bacterium clone HKT_RR51 16S ribosomal RNA gene, partial sequence	other	ICM3C9K02DDX8L	Otu040	9	0	3	0	6	0	0	0	0	0	0	0	0	0	0	0	0	0	0	0	0	0	0	0	0	0	2	0	0	0	0	0	1	0	0	0	3	0	0	2	0	0	0	1
Bacteria(100);Actinobacteria(100);Actinobacteria(100);Bifidobacteriales(100);Bifidobacteriaceae(100);Bifidobacterium(98);BeeBifido(92);	NR_102860	Bifidobacterium asteroides PRL2011 strain PRL2011 16S ribosomal RNA, complete sequence	Bifidobacterium from honey bees	ICM3C9K02EBU5G	Otu041	3820	2117	6	1570	12	115	0	179	260	104	0	377	255	28	75	137	58	143	103	138	260	0	0	0	0	0	0	2	0	1	1	0	2	0	0	0	2	3	0	1	0	0	0	1
Bacteria(100);Proteobacteria(100);Alphaproteobacteria(100);Sphingomonadales(100);Sphingomonadaceae(100);Novosphingobium(91);Novosphingobium_resinovorum(83);	KF040980	Novosphingobium resinovorum strain CE84 16S ribosomal RNA gene, partial sequence	Alphaproteobacteria	ICM3C9K02EHN1U	Otu042	26	0	23	0	3	0	0	0	0	0	0	0	0	0	0	0	0	0	0	0	0	0	0	0	0	0	1	4	5	0	0	0	0	13	0	1	1	0	1	0	0	0	0	0
Bacteria(100);Actinobacteria(100);Actinobacteria(100);Actinomycetales(100);unclassified;unclassified;unclassified;	JN560153	Amycolatopsis sp. MBRL 66 16S ribosomal RNA gene, partial sequence	Actinomycetales	ICM3C9K02DN1OL	Otu043	1	0	0	0	1	0	0	0	0	0	0	0	0	0	0	0	0	0	0	0	0	0	0	0	0	0	0	0	0	0	0	0	0	0	0	0	1	0	0	0	0	0	0	0
Bacteria(100);Proteobacteria(100);Alphaproteobacteria(100);Sphingomonadales(100);Sphingomonadaceae(90);unclassified;unclassified;	KC764061	Uncultured bacterium clone EUPI049 16S ribosomal RNA gene, partial sequence	Alphaproteobacteria	ICM3C9K02DWIRY	Otu044	1	0	0	0	1	0	0	0	0	0	0	0	0	0	0	0	0	0	0	0	0	0	0	0	0	0	0	0	0	0	0	0	0	0	0	0	1	0	0	0	0	0	0	0
Bacteria(100);Acidobacteria(100);iii1-8(100);DS-18(100);unclassified(100);unclassified(100);unclassified(100);	KF037269	Uncultured bacterium clone HF123 16S ribosomal RNA gene, partial sequence	other	ICM3C9K02DP2PS	Otu045	1	0	0	0	1	0	0	0	0	0	0	0	0	0	0	0	0	0	0	0	0	0	0	0	0	0	0	0	0	0	0	0	0	0	0	0	1	0	0	0	0	0	0	0
Bacteria(100);Proteobacteria(100);Betaproteobacteria(100);Rhodocyclales(93);Rhodocyclaceae(81);unclassified;unclassified;	FR846917	Uncultured bacterium partial 16S rRNA gene, clone AB2B-35	other	ICM3C9K02DI94E	Otu046	5	0	0	0	5	0	0	0	0	0	0	0	0	0	0	0	0	0	0	0	0	0	0	0	0	0	0	0	0	0	0	0	0	0	0	0	1	1	0	0	0	0	0	0
Bacteria(100);Proteobacteria(100);Alphaproteobacteria(100);Rhizobiales(100);Bradyrhizobiaceae(99);unclassified;unclassified;	KF026305	Uncultured bacterium clone EMC-0004 16S ribosomal RNA gene, partial sequence	Alphaproteobacteria	ICM3C9K02C47U5	Otu047	718	1	601	1	81	30	4	1	0	0	0	0	0	0	0	0	0	0	0	0	0	30	6	46	0	57	44	7	87	29	23	4	51	216	1	6	9	10	0	13	1	3	0	27
Bacteria(100);Proteobacteria(100);Gammaproteobacteria(100);Xanthomonadales(100);Xanthomonadaceae(100);Stenotrophomonas(89);unclassified(89);	KC751004	Stenotrophomonas maltophilia strain U758 16S ribosomal RNA gene, partial sequence	Gammaproteobacteria	ICM3C9K02C4BGP	Otu048	82	0	68	0	13	0	1	0	0	0	0	0	0	0	0	0	0	0	0	0	0	2	8	0	0	3	15	9	6	12	0	0	6	7	0	0	0	5	0	0	0	0	0	4
Bacteria(100);Proteobacteria(100);Alphaproteobacteria(100);Rhodospirillales(100);Acetobacteraceae(100);Alpha2.2(82);unclassified;	DQ837626	Uncultured firmicute clone HBG_B2V6-2 16S ribosomal RNA gene, partial sequence	Alpha 2.2	ICM3C9K02C38PV	Otu049	44114	63	13	100	18	43909	11	19	11	0	0	0	1	23	0	0	2	2	3	1	1	8	0	0	0	0	0	0	0	0	0	0	5	0	0	1	1	3	0	10	0	0	0	0
Bacteria(100);Firmicutes(100);Bacilli(99);Lactobacillales(99);Lactobacillaceae(99);Lactobacillus(99);Firm5(97);	KC477412	Uncultured Lactobacillus sp. clone BtNS1 16S ribosomal RNA gene, partial sequence	Firm 5	ICM3C9K02DI1JN	Otu050	13728	4226	1	5993	19	3489	0	111	15	2	0	114	623	101	60	1025	13	125	1946	90	1	0	0	0	0	0	0	0	0	0	1	0	0	0	0	0	0	1	0	4	0	1	0	6
Bacteria(100);Proteobacteria(100);Alphaproteobacteria(100);Rhodospirillales(100);Acetobacteraceae(100);Alpha2.1(100);unclassified;	HE660714	Uncultured bacterium partial 16S rRNA gene, clone 2231	Alpha 2.1	ICM3C9K02DFHUS	Otu051	21167	16303	74	4632	11	146	1	2061	1943	124	3	4279	581	433	609	49	501	1990	1440	1038	1252	0	0	0	9	1	4	0	0	5	1	17	13	24	0	0	0	2	0	0	1	2	0	3
Bacteria(100);Actinobacteria(100);Actinobacteria(100);Actinomycetales(100);unclassified;unclassified;unclassified;	JX644254	Uncultured bacterium clone DL4CY4G01 16S ribosomal RNA gene, partial sequence	Actinomycetales	ICM3C9K02DQGOV	Otu052	4	0	0	0	2	2	0	0	0	0	0	0	0	0	0	0	0	0	0	0	0	0	0	0	0	0	0	0	0	0	0	0	0	0	0	0	0	2	0	0	0	0	0	0
Bacteria(100);Actinobacteria(100);Actinobacteria(100);Actinomycetales(98);unclassified;unclassified;unclassified;	JX301644	Uncultured Gordonia sp. clone SR_61_(1) 16S ribosomal RNA gene, partial sequence	Actinomycetales	ICM3C9K02DCULQ	Otu053	1	0	0	0	1	0	0	0	0	0	0	0	0	0	0	0	0	0	0	0	0	0	0	0	0	0	0	0	0	0	0	0	0	0	0	0	0	1	0	0	0	0	0	0
Bacteria(100);Proteobacteria(100);Alphaproteobacteria(100);Sphingomonadales(98);Sphingomonadaceae(80);unclassified;unclassified;	KF037874	Uncultured bacterium clone YF706 16S ribosomal RNA gene, partial sequence	Alphaproteobacteria	ICM3C9K02EHWUJ	Otu054	50	0	18	0	20	1	11	0	0	0	0	0	0	0	0	0	0	0	0	0	0	0	0	0	0	0	13	1	1	1	2	0	0	0	0	2	0	1	0	0	0	1	1	9
Bacteria(100);Firmicutes(100);Clostridia(100);Clostridiales(100);Clostridiales_Family_XI._Incertae_Sedis(100);Anaerococcus(100);unclassified(96);	JX631306	Uncultured bacterium clone G8XQE6O03F1X3Q 16S ribosomal RNA gene, partial sequence	Firmicutes	ICM3C9K02DHB2S	Otu055	1	0	0	0	1	0	0	0	0	0	0	0	0	0	0	0	0	0	0	0	0	0	0	0	0	0	0	0	0	0	0	0	0	0	0	0	0	1	0	0	0	0	0	0
Bacteria(100);Firmicutes(100);Bacilli(99);Bacillales(99);Staphylococcaceae(96);Salinicoccus(96);unclassified(96);	GU397409	Salinicoccus alkaliphilus strain X2B 16S ribosomal RNA gene, partial sequence	Firmicutes	ICM3C9K02CY9AV	Otu056	78	2	67	0	5	0	4	0	0	0	0	0	0	0	0	0	2	0	0	0	0	0	0	0	0	0	43	2	0	3	1	0	11	7	0	0	0	0	0	4	0	0	0	0
Bacteria(100);Proteobacteria(100);Gammaproteobacteria(100);Pseudomonadales(99);Moraxellaceae(98);Acinetobacter(98);unclassified;	KF032765	Bacterium LGM47 16S ribosomal RNA gene, partial sequence	Gammaproteobacteria	ICM3C9K02EU6B5	Otu057	66	0	59	0	7	0	0	0	0	0	0	0	0	0	0	0	0	0	0	0	0	0	3	0	0	28	2	11	4	0	5	0	6	0	0	0	0	0	0	3	0	0	0	4
Bacteria(100);Proteobacteria(100);Alphaproteobacteria(100);Sphingomonadales(97);Sphingomonadaceae(95);unclassified;unclassified;	JQ629685	Uncultured bacterium clone Reactor3_40 16S ribosomal RNA gene, partial sequence	Alphaproteobacteria	ICM3C9K02EKZ52	Otu058	7	0	3	0	3	0	1	0	0	0	0	0	0	0	0	0	0	0	0	0	0	0	0	0	0	0	0	0	0	0	1	0	2	0	0	0	0	0	0	2	0	0	0	1
Bacteria(100);Proteobacteria(100);Alphaproteobacteria(100);Rhodobacterales(97);Rhodobacteraceae(97);unclassified;unclassified;	CU924840	Uncultured Betaproteobacteria bacterium 16S rRNA gene from clone QEDN11BA05	Alphaproteobacteria	ICM3C9K02DXLZ7	Otu059	2	0	0	0	2	0	0	0	0	0	0	0	0	0	0	0	0	0	0	0	0	0	0	0	0	0	0	0	0	0	0	0	0	0	0	0	0	0	0	2	0	0	0	0
Bacteria(100);Proteobacteria(100);Gammaproteobacteria(100);Pseudomonadales(100);Moraxellaceae(100);unclassified;unclassified;	KC866288	Moraxella osloensis strain V1064215 16S ribosomal RNA gene, partial sequence	Gammaproteobacteria	ICM3C9K02DAGOX	Otu060	14	0	12	0	2	0	0	0	0	0	0	0	0	0	0	0	0	0	0	0	0	0	0	0	0	0	4	3	0	2	0	0	0	3	0	0	0	1	0	1	0	0	0	0
Bacteria(100);Proteobacteria(100);Alphaproteobacteria(100);Rhodobacterales(99);Rhodobacteraceae(99);unclassified;unclassified;	JF476351	Uncultured Rhodobacter sp. clone 0B046A1_00148 16S ribosomal RNA gene, partial sequence	Alphaproteobacteria	ICM3C9K02C7OG9	Otu061	1	0	0	0	1	0	0	0	0	0	0	0	0	0	0	0	0	0	0	0	0	0	0	0	0	0	0	0	0	0	0	0	0	0	0	0	0	0	0	1	0	0	0	0
Bacteria(100);Actinobacteria(100);Actinobacteria(100);Actinomycetales(100);Pseudonocardiaceae(100);Actinophytocola(97);unclassified;	JQ379065	Uncultured bacterium clone NTS002Faste1_10738 16S ribosomal RNA gene, partial sequence	Actinomycetales	ICM3C9K02DJNFN	Otu062	3	0	2	0	1	0	0	0	0	0	0	0	0	0	0	0	0	0	0	0	0	0	0	0	0	0	1	0	1	0	0	0	0	0	0	0	0	0	0	1	0	0	0	0
Bacteria(100);Firmicutes(100);Bacilli(100);Bacillales(100);Staphylococcaceae(100);Jeotgalicoccus(100);unclassified(100);	KC884687	Jeotgalicoccus sp. L39-1 16S ribosomal RNA gene, partial sequence	Firmicutes	ICM3C9K02CYPM1	Otu063	196	0	194	0	2	0	0	0	0	0	0	0	0	0	0	0	0	0	0	0	0	0	0	0	0	0	0	191	0	0	2	0	1	0	0	0	0	0	0	1	0	0	0	0
Bacteria(100);Proteobacteria(100);Alphaproteobacteria(100);Rhodospirillales(100);Acetobacteraceae(100);Roseomonas(100);unclassified(100);	JQ977350	Roseomonas sp. Atb2 16S ribosomal RNA gene, partial sequence	Acetobacteraceae	ICM3C9K02EKK7B	Otu064	3	0	1	0	2	0	0	0	0	0	0	0	0	0	0	0	0	0	0	0	0	0	0	0	0	0	0	0	0	0	0	0	1	0	0	0	0	0	0	1	0	0	0	0
Bacteria(100);TM6(100);SJA-4(98);unclassified(98);unclassified(98);unclassified(98);unclassified(98);	KC327983	Uncultured bacterium clone SPTFE1_476 16S ribosomal RNA gene, partial sequence	other	ICM3C9K02D3KX0	Otu065	1	0	0	0	1	0	0	0	0	0	0	0	0	0	0	0	0	0	0	0	0	0	0	0	0	0	0	0	0	0	0	0	0	0	0	0	0	0	0	1	0	0	0	0
Bacteria(100);Firmicutes(100);Bacilli(100);Lactobacillales(100);Enterococcaceae(100);Enterococcus(100);unclassified(90);	KF032811	Bacterium LGM93 16S ribosomal RNA gene, partial sequence	other	ICM3C9K02DBOXX	Otu066	6	0	4	0	2	0	0	0	0	0	0	0	0	0	0	0	0	0	0	0	0	0	0	0	0	0	3	1	0	0	0	0	0	0	0	1	0	0	0	1	0	0	0	0
Bacteria(100);Proteobacteria(100);Alphaproteobacteria(100);unclassified;unclassified;unclassified;unclassified;	KC172369	Uncultured Sphingomonas sp. clone DM11-56 16S ribosomal RNA gene, partial sequence	Alphaproteobacteria	ICM3C9K02EK74B	Otu067	15	0	9	0	6	0	0	0	0	0	0	0	0	0	0	0	0	0	0	0	0	0	0	0	0	0	7	0	1	0	0	0	1	0	0	1	0	0	0	1	0	0	0	4
Bacteria(100);Proteobacteria(100);unclassified;unclassified;unclassified;unclassified;unclassified;	JX635586	Uncultured bacterium clone HBYTM9301B9C17 16S ribosomal RNA gene, partial sequence	other	ICM3C9K02EHKN0	Otu068	3	0	0	0	3	0	0	0	0	0	0	0	0	0	0	0	0	0	0	0	0	0	0	0	0	0	0	0	0	0	0	0	0	0	0	0	0	0	0	1	0	0	0	0
Bacteria(100);Proteobacteria(100);Gammaproteobacteria(100);Alteromonadales(100);Pseudoalteromonadaceae(88);Pseudoalteromonas(88);unclassified;	KF021728	Pseudoalteromonas sp. H-41 16S ribosomal RNA gene, partial sequence	Gammaproteobacteria	ICM3C9K02C5FFJ	Otu069	1	0	0	0	1	0	0	0	0	0	0	0	0	0	0	0	0	0	0	0	0	0	0	0	0	0	0	0	0	0	0	0	0	0	0	0	0	0	0	1	0	0	0	0
Bacteria(100);Bacteroidetes(100);unclassified;unclassified;unclassified;unclassified;unclassified;	KF228161	Pedobacter daechungensis clone C10-0AF4G_11038 16S ribosomal RNA gene, partial sequence	other	ICM3C9K02DP9ZX	Otu070	1	0	0	0	1	0	0	0	0	0	0	0	0	0	0	0	0	0	0	0	0	0	0	0	0	0	0	0	0	0	0	0	0	0	0	0	0	0	0	1	0	0	0	0
Bacteria(100);TM7(100);TM7-1(100);unclassified(100);unclassified(100);unclassified(100);unclassified(100);	JQ973467	Uncultured bacterium clone HA9 16S ribosomal RNA gene, partial sequence	other	ICM3C9K02CZJBM	Otu071	15	0	13	0	1	0	1	0	0	0	0	0	0	0	0	0	0	0	0	0	0	0	0	0	0	0	13	0	0	0	0	0	0	0	0	0	0	0	0	1	0	0	0	0
Bacteria(100);Proteobacteria(100);Alphaproteobacteria(100);Rhodospirillales(100);Acetobacteraceae(100);Roseomonas(90);unclassified(87);	KC515894	Uncultured Roseomonas sp. clone MRS1-252 16S ribosomal RNA gene, partial sequence	Acetobacteraceae	ICM3C9K02DZ8JE	Otu072	12	0	6	0	5	0	1	0	0	0	0	0	0	0	0	0	0	0	0	0	0	0	0	0	0	0	6	0	0	0	0	0	0	0	0	0	0	0	0	1	0	0	0	0
Bacteria(100);Actinobacteria(100);Actinobacteria(100);Actinomycetales(100);Geodermatophilaceae(100);unclassified;unclassified;	KC606908	Uncultured bacterium clone BAC2_1_C11 16S ribosomal RNA gene, partial sequence	Actinomycetales	ICM3C9K02EVAL2	Otu073	71	0	43	0	20	1	7	0	0	0	0	0	0	0	0	0	0	0	0	0	0	1	1	0	0	0	28	1	1	2	4	1	2	0	2	0	0	0	0	3	1	0	0	5
Bacteria(100);Firmicutes(100);Bacilli(100);Lactobacillales(100);Lactobacillaceae(100);Lactobacillus(100);Lactobacillus_delbrueckii(95);	KC920823	Lactobacillus delbrueckii subsp. bulgaricus strain KT6 16S ribosomal RNA gene, partial sequence	Lactobacillus sp.	ICM3C9K02DW8M6	Otu074	3	0	0	0	3	0	0	0	0	0	0	0	0	0	0	0	0	0	0	0	0	0	0	0	0	0	0	0	0	0	0	0	0	0	0	0	0	0	0	2	0	0	0	0
Bacteria(100);Proteobacteria(100);Betaproteobacteria(100);Burkholderiales(99);Comamonadaceae(99);Ramlibacter(99);unclassified(99);	JQ795341	Uncultured beta proteobacterium clone Aug-VN132 16S ribosomal RNA gene, partial sequence	other	ICM3C9K02C3YTW	Otu075	7	0	3	0	3	0	1	0	0	0	0	0	0	0	0	0	0	0	0	0	0	0	0	0	0	0	0	2	0	0	0	0	1	0	0	1	0	0	0	1	0	0	0	0
Bacteria(100);Actinobacteria(100);Actinobacteria(100);Actinomycetales(100);Micrococcaceae(88);unclassified;unclassified;	KC554863	Uncultured bacterium clone A3-444. 16S ribosomal RNA gene, partial sequence	Actinomycetales	ICM3C9K02DWZ0N	Otu076	18	0	9	0	7	0	2	0	0	0	0	0	0	0	0	0	0	0	0	0	0	0	0	3	0	0	0	0	0	0	1	0	0	5	0	0	0	0	0	0	2	1	0	1
Bacteria(100);Firmicutes(100);Bacilli(100);Bacillales(100);unclassified;unclassified;unclassified;	KC311560	Oceanobacillus sp. GD04 16S ribosomal RNA gene, partial sequence	Firmicutes	ICM3C9K02CZBUT	Otu077	1	0	0	0	1	0	0	0	0	0	0	0	0	0	0	0	0	0	0	0	0	0	0	0	0	0	0	0	0	0	0	0	0	0	0	0	0	0	0	0	1	0	0	0
Bacteria(100);Proteobacteria(100);Alphaproteobacteria(100);Rhodospirillales(100);Acetobacteraceae(100);Roseomonas(100);unclassified(100);	JX100086	Uncultured bacterium clone HLLHb154 16S ribosomal RNA gene, partial sequence	Acetobacteraceae	ICM3C9K02EM2LR	Otu078	7	0	1	0	3	0	3	0	0	0	0	0	0	0	0	0	0	0	0	0	0	0	1	0	0	0	0	0	0	0	0	0	0	0	0	0	0	1	0	0	2	0	0	0
Bacteria(100);Firmicutes(100);Clostridia(100);Clostridiales(100);Clostridiaceae(92);Clostridium(92);Clostridium_hiranonis(92);	JX635864	Uncultured bacterium clone HBYTM9302IDVJV 16S ribosomal RNA gene, partial sequence	Firmicutes	ICM3C9K02DR70V	Otu079	97	0	88	0	1	0	8	0	0	0	0	0	0	0	0	0	0	0	0	0	0	0	2	0	0	2	28	29	0	0	4	0	15	6	2	0	0	0	0	0	1	0	0	0
Bacteria(100);Firmicutes(100);Bacilli(100);Lactobacillales(100);Lactobacillaceae(99);Lactobacillus(99);Firm4(98);	HE613304	Uncultured bacterium partial 16S rRNA gene, clone 73_15	Firm 4	ICM3C9K02D0A1C	Otu080	13994	4680	10	8787	8	509	0	1180	275	53	0	434	697	133	125	274	210	237	168	364	530	0	0	0	4	0	0	3	1	0	1	0	1	0	0	0	0	0	0	0	1	5	0	0
Bacteria(100);Firmicutes(100);Bacilli(100);Bacillales(100);Paenibacillaceae(83);Brevibacillus(83);unclassified(83);	KC873888	Uncultured bacterium clone S67_012 16S ribosomal RNA gene, partial sequence	Firmicutes	ICM3C9K02EJSXI	Otu081	1	0	0	0	1	0	0	0	0	0	0	0	0	0	0	0	0	0	0	0	0	0	0	0	0	0	0	0	0	0	0	0	0	0	0	0	0	0	0	0	1	0	0	0
Bacteria(100);Proteobacteria(100);Betaproteobacteria(100);Burkholderiales(84);unclassified;unclassified;unclassified;	KC606205	Uncultured bacterium clone CSbiofilm_2_040210_G09 16S ribosomal RNA gene, partial sequence	other	ICM3C9K02ETD7A	Otu082	4	0	3	0	1	0	0	0	0	0	0	0	0	0	0	0	0	0	0	0	0	0	0	0	0	0	1	1	0	0	0	0	1	0	0	0	0	0	0	0	1	0	0	0
Bacteria(100);Proteobacteria(100);Gammaproteobacteria(100);Xanthomonadales(98);Xanthomonadaceae(98);unclassified;unclassified;	AB809961	Uncultured gamma proteobacterium gene for 16S ribosomal RNA, partial sequence, clone: AN346	Gammaproteobacteria	ICM3C9K02DY5Q3	Otu083	3386	11	2378	2	784	166	45	0	0	0	0	1	1	3	2	1	1	0	2	0	0	79	24	40	0	213	294	49	199	242	94	29	103	1002	10	91	43	32	0	51	43	77	8	170
Bacteria(100);Proteobacteria(100);Gammaproteobacteria(100);Pseudomonadales(99);Pseudomonadaceae(99);unclassified(96);unclassified(96);	JQ437532	Uncultured bacterium clone AMM-9 16S ribosomal RNA gene, partial sequence	Gammaproteobacteria	ICM3C9K02EDHP6	Otu084	4349	3044	4	1291	3	7	0	49	0	0	1	2909	6	24	0	0	0	0	1	0	54	0	0	0	4	0	0	0	0	0	0	0	0	0	0	0	0	0	0	0	0	3	0	0
Bacteria(100);Firmicutes(100);Bacilli(100);Lactobacillales(100);Carnobacteriaceae(100);Granulicatella(99);unclassified(99);	KC676133	Uncultured Granulicatella sp. clone 5H062 16S ribosomal RNA gene, partial sequence	other	ICM3C9K02ELMCM	Otu085	24	0	21	0	3	0	0	0	0	0	0	0	0	0	0	0	0	0	0	0	0	0	0	4	0	0	0	0	0	0	0	0	17	0	0	0	0	0	0	0	0	2	0	0
Bacteria(100);Proteobacteria(100);Gammaproteobacteria(100);Xanthomonadales(99);Xanthomonadaceae(99);Thermomonas(96);unclassified;	JQ103466	Uncultured bacterium clone J3_6_346 16S ribosomal RNA gene, partial sequence	Gammaproteobacteria	ICM3C9K02ETD0B	Otu086	1	0	0	0	1	0	0	0	0	0	0	0	0	0	0	0	0	0	0	0	0	0	0	0	0	0	0	0	0	0	0	0	0	0	0	0	0	0	0	0	0	1	0	0
Bacteria(100);Actinobacteria(100);Actinobacteria(100);Actinomycetales(100);Nocardioidaceae(99);Aeromicrobium(99);unclassified(99);	JQ427451	Uncultured bacterium clone CT0C2AB08 16S ribosomal RNA gene, partial sequence	Actinomycetales	ICM3C9K02D2XAM	Otu087	1	0	0	0	1	0	0	0	0	0	0	0	0	0	0	0	0	0	0	0	0	0	0	0	0	0	0	0	0	0	0	0	0	0	0	0	0	0	0	0	0	1	0	0
Bacteria(100);Actinobacteria(100);Actinobacteria(100);Actinomycetales(100);Streptomycetaceae(85);Streptomyces(85);unclassified(82);	JX094815	Streptomyces sp. YIM M 11391 16S ribosomal RNA gene, partial sequence	Actinomycetales	ICM3C9K02EJ42I	Otu088	4	0	0	0	4	0	0	0	0	0	0	0	0	0	0	0	0	0	0	0	0	0	0	0	0	0	0	0	0	0	0	0	0	0	0	0	0	0	0	0	0	4	0	0
Bacteria(100);Actinobacteria(100);Actinobacteria(100);Actinomycetales(100);unclassified;unclassified;unclassified;	KC994889	Rhodococcus sp. HH43 16S ribosomal RNA gene, partial sequence	Actinomycetales	ICM3C9K02DGSSQ	Otu089	272	1	207	0	43	5	16	0	0	0	0	0	0	0	0	0	0	0	1	0	0	3	3	3	0	2	46	70	9	5	25	1	21	19	0	3	5	3	0	3	0	3	0	3
Bacteria(100);Proteobacteria(100);Alphaproteobacteria(100);Rhodospirillales(100);Rhodospirillaceae(100);Skermanella(100);unclassified(100);	KC764224	Uncultured bacterium clone SCPI084 16S ribosomal RNA gene, partial sequence	Alphaproteobacteria	ICM3C9K02DNQ5L	Otu090	71	0	58	0	6	5	2	0	0	0	0	0	0	0	0	0	0	0	0	0	0	0	2	0	0	1	35	1	0	0	1	0	9	9	0	0	0	0	0	1	0	1	0	4
Bacteria(100);Firmicutes(100);Bacilli(100);Bacillales(100);Staphylococcaceae(99);Salinicoccus(99);unclassified(99);	KF021739	Salinicoccus sp. H-54 16S ribosomal RNA gene, partial sequence	Firmicutes	ICM3C9K02EJWWC	Otu091	378	0	370	0	5	0	3	0	0	0	0	0	0	0	0	0	0	0	0	0	0	0	6	0	0	3	170	7	22	18	20	0	84	38	2	0	0	0	0	1	0	0	2	1
Bacteria(100);Proteobacteria(100);Gammaproteobacteria(100);Pseudomonadales(100);Moraxellaceae(98);Acinetobacter(98);unclassified;	KC631628	Acinetobacter sp. HF5-2 16S ribosomal RNA gene, partial sequence	Gammaproteobacteria	ICM3C9K02ECO3B	Otu092	1618	0	1600	1	2	14	1	0	0	0	0	0	0	0	0	0	0	0	0	0	0	3	0	445	0	41	0	12	1093	2	0	0	3	0	1	0	0	0	0	0	0	0	1	1
Bacteria(100);Proteobacteria(100);Betaproteobacteria(100);Hydrogenophilales(84);Hydrogenophilaceae(84);Thiobacillus(84);unclassified(84);	JF341663	Uncultured bacterium clone 011MICCcrown 16S ribosomal RNA gene, partial sequence	other	ICM3C9K02D50L9	Otu093	1	0	0	0	1	0	0	0	0	0	0	0	0	0	0	0	0	0	0	0	0	0	0	0	0	0	0	0	0	0	0	0	0	0	0	0	0	0	0	0	0	0	1	0
Bacteria(100);Bacteroidetes(100);Flavobacteria(98);Flavobacteriales(98);Flavobacteriaceae(97);Flavobacterium(82);unclassified;	JQ977271	Flavobacterium sp. Eza24 16S ribosomal RNA gene, partial sequence	other	ICM3C9K02EQJY3	Otu094	1	0	0	0	1	0	0	0	0	0	0	0	0	0	0	0	0	0	0	0	0	0	0	0	0	0	0	0	0	0	0	0	0	0	0	0	0	0	0	0	0	0	1	0
Bacteria(100);Proteobacteria(100);Betaproteobacteria(100);Burkholderiales(98);Comamonadaceae(89);unclassified;unclassified;	KC607193	Uncultured bacterium clone CarbonSeq11b_030410_D08 16S ribosomal RNA gene, partial sequence	other	ICM3C9K02D5QGM	Otu095	6	0	0	0	6	0	0	0	0	0	0	0	0	0	0	0	0	0	0	0	0	0	0	0	0	0	0	0	0	0	0	0	0	0	0	0	0	0	0	0	0	0	0	6
Bacteria(100);Firmicutes(100);Bacilli(99);Lactobacillales(99);Carnobacteriaceae(97);unclassified(96);unclassified(96);	JX639970	Uncultured bacterium clone HA3ER6P01CB6LL 16S ribosomal RNA gene, partial sequence	other	ICM3C9K02C24DA	Otu096	16	0	12	0	4	0	0	0	0	0	0	0	0	0	0	0	0	0	0	0	0	0	0	0	0	0	11	0	1	0	0	0	0	0	0	0	0	0	0	0	0	0	0	4
Bacteria(100);Bacteroidetes(100);Sphingobacteria(100);Sphingobacteriales(100);Chitinophagaceae(99);unclassified(93);unclassified(93);	KC560021	Bacteroidetes bacterium RG1-1 16S ribosomal RNA gene, partial sequence	other	ICM3C9K02C5JC7	Otu097	5	0	1	0	4	0	0	0	0	0	0	0	0	0	0	0	0	0	0	0	0	0	0	0	0	0	0	0	0	0	0	0	1	0	0	0	1	0	0	0	0	0	0	3
Bacteria(100);Proteobacteria(100);Gammaproteobacteria(100);Gammaproteobacteria_order_incertae_sedis(100);Gammaproteobacteria_family_incertae_sedis(100);Gamma-1(99);unclassified;	JQ936674	Gilliamella apicola strain wkB1 16S ribosomal RNA gene, complete sequence	Gamma 1 Gilliamella sp.	ICM3C9K02EORFG	Otu098	38083	22960	344	9512	30	5237	0	783	419	2544	10	5638	615	1542	1106	774	1961	1361	3095	1874	1238	1	3	4	220	9	0	27	1	2	1	10	50	16	0	0	2	1	0	1	2	5	0	11
Bacteria(100);Proteobacteria(100);Alphaproteobacteria(99);Sphingomonadales(99);Sphingomonadaceae(99);Sphingomonas(87);Sphingomonas_wittichii(87);	JQ629699	Uncultured bacterium clone Reactor3_55 16S ribosomal RNA gene, partial sequence	Alphaproteobacteria	ICM3C9K02D3O2B	Otu099	3	0	0	0	3	0	0	0	0	0	0	0	0	0	0	0	0	0	0	0	0	0	0	0	0	0	0	0	0	0	0	0	0	0	0	0	0	0	0	0	0	0	0	3
Bacteria(100);Proteobacteria(100);Alphaproteobacteria(100);Sphingomonadales(100);unclassified;unclassified;unclassified;	JX633948	Uncultured bacterium clone G8XQE6O04IF13W 16S ribosomal RNA gene, partial sequence	Alphaproteobacteria	ICM3C9K02EK9XW	Otu100	3	0	0	0	3	0	0	0	0	0	0	0	0	0	0	0	0	0	0	0	0	0	0	0	0	0	0	0	0	0	0	0	0	0	0	0	0	0	0	0	0	0	0	3
Bacteria(100);Proteobacteria(100);Alphaproteobacteria(100);Rhodospirillales(100);Acetobacteraceae(100);Roseomonas(99);unclassified;	HM362532	Uncultured bacterium clone BG123 16S ribosomal RNA gene, partial sequence	Acetobacteraceae	ICM3C9K02DD6IH	Otu101	18	0	14	0	4	0	0	0	0	0	0	0	0	0	0	0	0	0	0	0	0	0	0	0	0	0	14	0	0	0	0	0	0	0	0	0	0	0	0	0	0	0	0	4
Bacteria(100);Actinobacteria(100);Actinobacteria(100);Coriobacteriales(98);Coriobacteriaceae(98);Enterorhabdus(87);unclassified;	EU470333	Uncultured bacterium clone GZ_aaa04f08 16S ribosomal RNA gene, partial sequence	other	ICM3C9K02C63O6	Otu102	4	0	2	0	2	0	0	0	0	0	0	0	0	0	0	0	0	0	0	0	0	0	0	0	0	0	2	0	0	0	0	0	0	0	0	0	0	0	0	0	0	0	0	2
Bacteria(100);Proteobacteria(100);Alphaproteobacteria(99);Rhodobacterales(88);Rhodobacteraceae(88);unclassified;unclassified;	JX633057	Uncultured bacterium clone G8XQE6O03HFSBI 16S ribosomal RNA gene, partial sequence	Alphaproteobacteria	ICM3C9K02C8D3J	Otu103	7	0	4	0	3	0	0	0	0	0	0	0	0	0	0	0	0	0	0	0	0	0	0	0	0	0	0	4	0	0	0	0	0	0	0	0	0	0	0	0	0	0	0	3
Bacteria(100);Bacteroidetes(100);Sphingobacteria(99);Sphingobacteriales(99);Chitinophagaceae(99);Flavisolibacter(97);unclassified(97);	JQ400772	Uncultured Flavisolibacter sp. clone CNY_00665 16S ribosomal RNA gene, partial sequence	other	ICM3C9K02EIUIN	Otu104	5	0	1	0	4	0	0	0	0	0	0	0	0	0	0	0	0	0	0	0	0	0	0	0	0	0	0	0	0	0	1	0	0	0	0	0	0	0	0	2	0	0	0	2
Bacteria(100);Firmicutes(100);Bacilli(100);Bacillales(100);Bacillaceae(90);Bacillus(89);unclassified;	JQ373097	Uncultured bacterium clone NTS001Powera3_13533 16S ribosomal RNA gene, partial sequence	Firmicutes	ICM3C9K02C1FMK	Otu105	6	0	1	0	3	2	0	0	0	0	0	0	0	0	0	0	0	0	0	0	0	0	0	0	0	0	1	0	0	0	0	0	0	0	0	0	0	0	0	1	0	0	0	2
Bacteria(100);Actinobacteria(100);Actinobacteria(100);Actinomycetales(100);Intrasporangiaceae(95);Ornithinimicrobium(90);unclassified;	JQ948045	Ornithinimicrobium sp. B2 16S ribosomal RNA gene, partial sequence	Actinomycetales	ICM3C9K02DZUIG	Otu106	174	0	153	0	17	0	4	0	0	0	0	0	0	0	0	0	0	0	0	0	0	0	2	12	0	5	52	5	0	3	13	0	38	21	2	1	1	0	0	2	1	1	0	5
Bacteria(100);Proteobacteria(100);Alphaproteobacteria(100);Rhizobiales(100);Hyphomicrobiaceae(96);Pedomicrobium(96);Pedomicrobium_australicum(86);	KC764188	Uncultured bacterium clone SCPI083 16S ribosomal RNA gene, partial sequence	Alphaproteobacteria	ICM3C9K02DLLH8	Otu107	51	0	43	0	6	1	1	0	0	0	0	0	0	0	0	0	0	0	0	0	0	2	2	7	0	6	8	1	0	6	0	1	2	8	0	0	0	0	0	0	0	0	0	4
Bacteria(100);Firmicutes(100);Clostridia(100);Clostridiales(100);Clostridiales_Incertae_Sedis_XVII(100);Thermaerobacter(100);unclassified;	EU214630	Thermaerobacter subterraneus strain ir-3 16S ribosomal RNA gene, partial sequence	Firmicutes	ICM3C9K02D3UHU	Otu108	1	0	0	0	1	0	0	0	0	0	0	0	0	0	0	0	0	0	0	0	0	0	0	0	0	0	0	0	0	0	0	0	0	0	0	0	0	0	0	0	0	0	0	1
Bacteria(100);Firmicutes(100);Bacilli(99);Bacillales(99);unclassified;unclassified;unclassified;	JN087516	Geobacillus sp. EFT1 16S ribosomal RNA gene, partial sequence	Firmicutes	ICM3C9K02DOW66	Otu109	1	0	0	0	1	0	0	0	0	0	0	0	0	0	0	0	0	0	0	0	0	0	0	0	0	0	0	0	0	0	0	0	0	0	0	0	0	0	0	0	0	0	0	1
Bacteria(100);Proteobacteria(100);Alphaproteobacteria(100);Rhizobiales(98);Bradyrhizobiaceae(95);unclassified;unclassified;	KC873139	Uncultured bacterium clone S42_061 16S ribosomal RNA gene, partial sequence	Alphaproteobacteria	ICM3C9K02EYIEG	Otu110	6	0	0	0	6	0	0	0	0	0	0	0	0	0	0	0	0	0	0	0	0	0	0	0	0	0	0	0	0	0	0	0	0	0	0	0	1	3	0	0	0	0	0	2
Bacteria(100);Proteobacteria(100);Alphaproteobacteria(100);Rhizobiales(100);unclassified;unclassified;unclassified;	KC624617	Uncultured bacterium clone T1S301D04 16S ribosomal RNA gene, partial sequence	Alphaproteobacteria	ICM3C9K02CZL0L	Otu111	7	0	5	0	2	0	0	0	0	0	0	0	0	0	0	0	0	0	0	0	0	0	2	0	0	0	2	0	0	0	1	0	0	0	0	0	0	1	0	0	0	0	0	1
Bacteria(100);Firmicutes(100);Bacilli(99);Bacillales(99);Bacillaceae(90);Bacillus(90);Bacillus_thermoamylovorans(80);	JX543762	Uncultured bacterium clone SeqID233 16S ribosomal RNA gene, partial sequence	Firmicutes	ICM3C9K02EM5LZ	Otu112	4	0	2	0	2	0	0	0	0	0	0	0	0	0	0	0	0	0	0	0	0	0	0	0	0	0	2	0	0	0	0	0	0	0	0	0	0	0	0	0	0	0	0	2
Bacteria(100);Proteobacteria(100);Gammaproteobacteria(100);Pseudomonadales(100);Moraxellaceae(100);Acinetobacter(100);Acinetobacter_septicus(80);	JQ680956	Paenibacillus chondroitinus strain BM0619 16S ribosomal RNA gene, partial sequence	Gammaproteobacteria	ICM3C9K02C8XSJ	Otu113	2	0	0	0	2	0	0	0	0	0	0	0	0	0	0	0	0	0	0	0	0	0	0	0	0	0	0	0	0	0	0	0	0	0	0	0	0	0	0	0	0	0	0	1
Bacteria(100);Proteobacteria(100);Alphaproteobacteria(99);Rhodospirillales(99);Acetobacteraceae(99);Roseomonas(98);unclassified(95);	KC559980	Uncultured bacterium clone B20 16S ribosomal RNA gene, partial sequence	Acetobacteraceae	ICM3C9K02ET2GY	Otu114	9	0	6	0	2	0	1	0	0	0	0	0	0	0	0	0	0	0	0	0	0	0	1	0	0	0	1	3	0	0	0	1	0	0	0	0	0	0	0	0	0	0	0	2
Bacteria(100);Firmicutes(100);Clostridia(100);Clostridiales(100);Clostridiales_Family_XI._Incertae_Sedis(99);Anaerococcus(99);unclassified(85);	JF236234	Uncultured bacterium clone ncd2736f01c1 16S ribosomal RNA gene, partial sequence	Firmicutes	ICM3C9K02EELQT	Otu115	1	0	0	0	1	0	0	0	0	0	0	0	0	0	0	0	0	0	0	0	0	0	0	0	0	0	0	0	0	0	0	0	0	0	0	0	0	0	0	0	0	0	0	1
Bacteria(100);Firmicutes(100);Bacilli(100);Lactobacillales(100);Lactobacillaceae(97);unclassified;unclassified;	KC755095	Lactobacillus sp. 6225121 16S ribosomal RNA gene, partial sequence	Lactobacillus sp.	ICM3C9K02D5905	Otu116	1	0	0	0	1	0	0	0	0	0	0	0	0	0	0	0	0	0	0	0	0	0	0	0	0	0	0	0	0	0	0	0	0	0	0	0	0	0	0	0	0	0	0	1
Bacteria(100);Bacteroidetes(100);Sphingobacteria(99);Sphingobacteriales(99);Flexibacteraceae(89);unclassified;unclassified;	AB696475	Uncultured bacterium gene for 16S rRNA, partial sequence, clone: T4CLN45	other	ICM3C9K02C8GJI	Otu117	1	0	0	0	1	0	0	0	0	0	0	0	0	0	0	0	0	0	0	0	0	0	0	0	0	0	0	0	0	0	0	0	0	0	0	0	0	0	0	0	0	0	0	1
Bacteria(100);Proteobacteria(100);Alphaproteobacteria(100);Rhizobiales(97);unclassified;unclassified;unclassified;	KC625186	Uncultured bacterium clone T2S302G05 16S ribosomal RNA gene, partial sequence	Alphaproteobacteria	ICM3C9K02DY5JR	Otu118	63	0	52	0	8	1	2	0	0	0	0	0	0	0	0	0	0	0	0	0	0	0	0	0	0	0	22	6	0	0	0	0	2	22	0	0	0	0	0	0	0	0	0	2
Bacteria(100);Actinobacteria(100);Actinobacteria(100);Actinomycetales(100);unclassified;unclassified;unclassified;	JX949771	Frondihabitans sp. MDT1-44 16S ribosomal RNA gene, partial sequence	Actinomycetales	ICM3C9K02DTYR8	Otu119	4	0	2	0	2	0	0	0	0	0	0	0	0	0	0	0	0	0	0	0	0	0	0	0	0	0	0	2	0	0	0	0	0	0	0	0	1	0	0	0	0	0	0	1
Bacteria(100);Proteobacteria(100);Alphaproteobacteria(100);unclassified;unclassified;unclassified;unclassified;	JQ384196	Uncultured bacterium clone NT03h3_17807 16S ribosomal RNA gene, partial sequence	Alphaproteobacteria	ICM3C9K02C33EA	Otu120	3	0	1	0	2	0	0	0	0	0	0	0	0	0	0	0	0	0	0	0	0	0	0	0	0	0	0	0	0	1	0	0	0	0	0	0	0	0	0	0	0	0	0	2
Bacteria(100);Proteobacteria(100);Alphaproteobacteria(100);Rhizobiales(99);Rhizobiaceae(99);Agrobacterium(99);Rhizobium_sp._IRBG_74(96);	KF150369	Agrobacterium tumefaciens strain JN60 16S ribosomal RNA gene, partial sequence	Alphaproteobacteria	ICM3C9K02DH0WR	Otu121	9	0	4	0	5	0	0	0	0	0	0	0	0	0	0	0	0	0	0	0	0	0	0	0	0	4	0	0	0	0	0	0	0	0	0	1	0	0	0	0	1	1	0	1
Bacteria(100);Proteobacteria(100);Alphaproteobacteria(100);Rhizobiales(99);Rhizobiaceae(99);Agrobacterium(99);Agrobacterium_rubi(80);	JX292370	Rhizobium sp. L32C555A00 16S ribosomal RNA gene, partial sequence	Alphaproteobacteria	ICM3C9K02ERN45	Otu122	1	0	0	0	1	0	0	0	0	0	0	0	0	0	0	0	0	0	0	0	0	0	0	0	0	0	0	0	0	0	0	0	0	0	0	0	0	0	0	0	0	0	0	1
Bacteria(100);Proteobacteria(100);Betaproteobacteria(100);Burkholderiales(96);unclassified;unclassified;unclassified;	KC299053	Uncultured bacterium clone 1287 16S ribosomal RNA gene, partial sequence	other	ICM3C9K02EHV19	Otu123	1	0	0	0	1	0	0	0	0	0	0	0	0	0	0	0	0	0	0	0	0	0	0	0	0	0	0	0	0	0	0	0	0	0	0	0	0	0	0	0	0	0	0	1
Bacteria(100);Actinobacteria(100);Actinobacteria(100);Actinomycetales(100);Nocardioidaceae(100);Aeromicrobium(100);Aeromicrobium_fastidiosum(82);	DQ298370	Uncultured bacterium clone PR56 16S ribosomal RNA gene, partial sequence	Actinomycetales	ICM3C9K02DYPK7	Otu124	1	0	0	0	1	0	0	0	0	0	0	0	0	0	0	0	0	0	0	0	0	0	0	0	0	0	0	0	0	0	0	0	0	0	0	0	0	0	0	0	0	0	0	1
Bacteria(100);Proteobacteria(100);Alphaproteobacteria(98);Rhizobiales(93);Brucellaceae(83);unclassified;unclassified;	.	.	Alphaproteobacteria	ICM3C9K02ED0NM	Otu125	1	0	0	0	1	0	0	0	0	0	0	0	0	0	0	0	0	0	0	0	0	0	0	0	0	0	0	0	0	0	0	0	0	0	0	0	0	0	0	0	0	0	0	1
Bacteria(100);Proteobacteria(100);Betaproteobacteria(100);Burkholderiales(98);unclassified;unclassified;unclassified;	KC620894	Uncultured bacterium clone AMD-I78 16S ribosomal RNA gene, partial sequence	other	ICM3C9K02D6F4V	Otu126	1	0	0	0	1	0	0	0	0	0	0	0	0	0	0	0	0	0	0	0	0	0	0	0	0	0	0	0	0	0	0	0	0	0	0	0	0	0	0	0	0	0	0	1
Bacteria(100);Proteobacteria(100);Alphaproteobacteria(100);Sphingomonadales(100);Sphingomonadaceae(100);Sphingomonas(92);unclassified;	KC987002	Sphingomonas faeni strain TP-Snow-C72 16S ribosomal RNA gene, partial sequence	Alphaproteobacteria	ICM3C9K02EDR32	Otu127	1	0	0	0	1	0	0	0	0	0	0	0	0	0	0	0	0	0	0	0	0	0	0	0	0	0	0	0	0	0	0	0	0	0	0	0	0	0	0	0	0	0	0	1
Bacteria(100);Bacteroidetes(100);Sphingobacteria(100);Sphingobacteriales(100);Chitinophagaceae(99);unclassified;unclassified;	JQ400778	Uncultured Flavisolibacter sp. clone CNY_00673 16S ribosomal RNA gene, partial sequence	other	ICM3C9K02DT2G1	Otu128	1	0	0	0	1	0	0	0	0	0	0	0	0	0	0	0	0	0	0	0	0	0	0	0	0	0	0	0	0	0	0	0	0	0	0	0	0	0	0	0	0	0	0	1
Bacteria(100);Proteobacteria(100);Gammaproteobacteria(100);Pseudomonadales(100);Moraxellaceae(100);Psychrobacter(100);unclassified;	JX636291	Uncultured bacterium clone HBYTM9302H631J 16S ribosomal RNA gene, partial sequence	Gammaproteobacteria	ICM3C9K02ER2DW	Otu129	3	0	0	0	3	0	0	0	0	0	0	0	0	0	0	0	0	0	0	0	0	0	0	0	0	0	0	0	0	0	0	0	0	0	0	0	0	0	0	0	0	0	0	3
Bacteria(100);Bacteroidetes(100);Sphingobacteria(100);Sphingobacteriales(100);Chitinophagaceae(100);Segetibacter(100);unclassified(100);	JQ400945	Uncultured Segetibacter sp. clone CNY_00885 16S ribosomal RNA gene, partial sequence	other	ICM3C9K02EO1RS	Otu130	10	0	9	0	1	0	0	0	0	0	0	0	0	0	0	0	0	0	0	0	0	0	1	0	0	8	0	0	0	0	0	0	0	0	0	0	0	0	0	0	0	0	0	1
Bacteria(100);Proteobacteria(100);Alphaproteobacteria(100);Rhizobiales(97);unclassified;unclassified;unclassified;	JF226078	Uncultured bacterium clone ncd2576d05c1 16S ribosomal RNA gene, partial sequence	Alphaproteobacteria	ICM3C9K02DYSNQ	Otu131	1	0	0	0	1	0	0	0	0	0	0	0	0	0	0	0	0	0	0	0	0	0	0	0	0	0	0	0	0	0	0	0	0	0	0	0	0	0	0	0	0	0	0	0
Bacteria(100);Proteobacteria(100);Betaproteobacteria(100);Burkholderiales(96);Burkholderiaceae(92);Cupriavidus(85);unclassified;	JF276749	Uncultured bacterium clone 11-99 16S ribosomal RNA gene, partial sequence	other	ICM3C9K02EC3QU	Otu132	1	0	0	0	1	0	0	0	0	0	0	0	0	0	0	0	0	0	0	0	0	0	0	0	0	0	0	0	0	0	0	0	0	0	0	0	0	0	0	0	0	0	0	0
Bacteria(100);Actinobacteria(100);Actinobacteria(100);Actinomycetales(100);unclassified;unclassified;unclassified;	JF910788	Uncultured bacterium clone Baft-02E5 16S ribosomal RNA gene, partial sequence	Actinomycetales	ICM3C9K02C6AXH	Otu133	1	0	0	0	1	0	0	0	0	0	0	0	0	0	0	0	0	0	0	0	0	0	0	0	0	0	0	0	0	0	0	0	0	0	0	0	0	0	0	0	0	0	0	0
Bacteria(100);Proteobacteria(100);Deltaproteobacteria(100);Myxococcales(100);Polyangiaceae(100);Sorangium(93);unclassified;	NR_102788	Sorangium cellulosum So ce56 strain So ce 56 16S ribosomal RNA, complete sequence	other	ICM3C9K02ECXKM	Otu134	8	0	0	0	8	0	0	0	0	0	0	0	0	0	0	0	0	0	0	0	0	0	0	0	0	0	0	0	0	0	0	0	0	0	0	0	0	0	0	0	0	0	0	0
Bacteria(100);Proteobacteria(100);Alphaproteobacteria(100);Sphingomonadales(100);Erythrobacteraceae(100);Erythrobacter(97);unclassified(87);	KC607126	Uncultured bacterium clone CarbonSeq024_022210_D07 16S ribosomal RNA gene, partial sequence	Alphaproteobacteria	ICM3C9K02C1AUB	Otu135	9	0	5	0	4	0	0	0	0	0	0	0	0	0	0	0	0	0	0	0	0	0	0	0	0	0	0	5	0	0	0	0	0	0	0	0	0	0	0	0	0	0	0	0
Bacteria(100);Firmicutes(100);Bacilli(100);Bacillales(100);Planococcaceae(99);Solibacillus(91);unclassified(86);	HE610416	Uncultured bacterium partial 16S rRNA gene, clone meg2	Firmicutes	ICM3C9K02CX3WR	Otu136	9	0	5	0	3	0	1	0	0	0	0	0	0	0	0	0	0	0	0	0	0	0	1	0	0	0	4	0	0	0	0	0	0	0	0	0	0	0	0	0	0	0	0	0
Bacteria(100);Proteobacteria(100);Gammaproteobacteria(100);Xanthomonadales(94);Xanthomonadaceae(94);unclassified;unclassified;	KC662312	Uncultured bacterium clone T107 16S ribosomal RNA gene, partial sequence	Gammaproteobacteria	ICM3C9K02DBNAZ	Otu137	2	0	0	0	2	0	0	0	0	0	0	0	0	0	0	0	0	0	0	0	0	0	0	0	0	0	0	0	0	0	0	0	0	0	0	0	0	0	0	0	0	0	0	0
Bacteria(100);Proteobacteria(100);Gammaproteobacteria(100);Pseudomonadales(99);Moraxellaceae(99);Acinetobacter(99);unclassified;	KC682695	Uncultured bacterium clone ABEsIN_C11 16S ribosomal RNA gene, partial sequence	Gammaproteobacteria	ICM3C9K02D8AGV	Otu138	8	0	2	0	6	0	0	0	0	0	0	0	0	0	0	0	0	0	0	0	0	0	0	0	0	0	0	1	0	0	0	0	1	0	0	0	0	0	0	0	0	0	0	3
Bacteria(100);Actinobacteria(100);Actinobacteria(100);Actinomycetales(100);unclassified;unclassified;unclassified;	KC606937	Uncultured bacterium clone CSbiofilm_14_040210_B11 16S ribosomal RNA gene, partial sequence	Actinomycetales	ICM3C9K02DVK86	Otu139	5	0	3	0	2	0	0	0	0	0	0	0	0	0	0	0	0	0	0	0	0	0	0	0	0	0	0	3	0	0	0	0	0	0	0	1	0	0	0	0	0	0	0	0
Bacteria(100);Bacteroidetes(100);Bacteroidia(100);Bacteroidales(100);Bacteroidaceae(99);Bacteroides(99);unclassified(94);	JX640464	Uncultured bacterium clone HA3ER6P01CKZAR 16S ribosomal RNA gene, partial sequence	other	ICM3C9K02C9UYJ	Otu140	1	0	0	0	1	0	0	0	0	0	0	0	0	0	0	0	0	0	0	0	0	0	0	0	0	0	0	0	0	0	0	0	0	0	0	0	0	0	0	0	0	0	0	0
Bacteria(100);Actinobacteria(100);Actinobacteria(100);Actinomycetales(100);Dietziaceae(84);Dietzia(84);unclassified;	KF052080	Dietzia cinnamea strain BC07 16S ribosomal RNA gene, partial sequence	Actinomycetales	ICM3C9K02DKZ5U	Otu141	37	0	35	0	2	0	0	0	0	0	0	0	0	0	0	0	0	0	0	0	0	0	0	4	0	0	18	7	0	2	0	0	4	0	0	0	1	0	0	0	0	0	0	0
Bacteria(100);Actinobacteria(100);Actinobacteria(100);Actinomycetales(100);Actinomycetaceae(80);unclassified;unclassified;	JX637779	Uncultured bacterium clone HA3ER6P01DJBQH 16S ribosomal RNA gene, partial sequence	Actinomycetales	ICM3C9K02D3O9I	Otu142	4	0	2	0	1	0	1	0	0	0	0	0	0	0	0	0	0	0	0	0	0	0	0	0	0	0	0	0	2	0	0	0	0	0	0	0	0	0	0	0	0	0	0	0
Bacteria(100);Proteobacteria(100);Gammaproteobacteria(100);Pseudomonadales(99);Moraxellaceae(99);Acinetobacter(99);unclassified;	KF018061	Uncultured Acinetobacter sp. clone AC 16S ribosomal RNA gene, partial sequence	Gammaproteobacteria	ICM3C9K02D2K7N	Otu143	30	0	25	0	5	0	0	0	0	0	0	0	0	0	0	0	0	0	0	0	0	0	0	1	0	0	0	0	12	1	0	1	1	9	0	0	0	0	0	0	0	0	0	3
Bacteria(100);Actinobacteria(100);Actinobacteria(100);Actinomycetales(100);Micrococcaceae(92);unclassified;unclassified;	JN187089	Nesterenkonia sp. BSJ27 16S ribosomal RNA gene, partial sequence	Actinomycetales	ICM3C9K02DBLL6	Otu144	40	0	37	0	3	0	0	0	0	0	0	0	0	0	0	0	0	0	0	0	0	0	0	0	0	3	7	0	1	1	3	0	2	20	0	0	0	0	0	0	0	0	0	0
Bacteria(100);Actinobacteria(100);Actinobacteria(100);Rubrobacterales(100);Rubrobacteraceae(100);Rubrobacter(100);unclassified(99);	JQ401345	Uncultured Rubrobacter sp. clone CNY_01381 16S ribosomal RNA gene, partial sequence	other	ICM3C9K02DVZ7W	Otu145	1	0	0	0	1	0	0	0	0	0	0	0	0	0	0	0	0	0	0	0	0	0	0	0	0	0	0	0	0	0	0	0	0	0	0	0	0	0	0	0	0	0	0	0
Bacteria(100);Proteobacteria(100);Betaproteobacteria(100);Nitrosomonadales(91);Nitrosomonadaceae(91);unclassified;unclassified;	JQ372952	Uncultured bacterium clone NTS002Powera1_9236 16S ribosomal RNA gene, partial sequence	other	ICM3C9K02DSLHE	Otu146	2	0	0	0	2	0	0	0	0	0	0	0	0	0	0	0	0	0	0	0	0	0	0	0	0	0	0	0	0	0	0	0	0	0	0	0	0	0	0	0	0	0	0	0
Bacteria(100);Proteobacteria(100);Gammaproteobacteria(100);Enterobacteriales(100);Enterobacteriaceae(100);Xenorhabdus(90);unclassified(90);	KC605510	Uncultured bacterium clone CarbonSeq09b_030410_5868 16S ribosomal RNA gene, partial sequence	Enterobacteriaceae	ICM3C9K02C06TC	Otu147	22394	5459	874	3	31	15954	73	5458	0	0	0	0	0	0	0	0	1	0	0	0	0	0	3	14	0	9	17	40	11	1	0	0	35	741	3	7	0	1	0	13	0	1	0	0
Bacteria(100);Firmicutes(100);Bacilli(100);Lactobacillales(100);Lactobacillaceae(100);Lactobacillus(100);Firm5(84);	AB810039	Lactobacillus sp. AcjLac18 gene for 16S ribosomal RNA, partial sequence	Firm 5	ICM3C9K01AQART	Otu148	194234	86626	898	95163	189	11347	11	8648	5634	4205	43	13525	3581	7413	7929	5457	2031	10595	2502	7482	7581	4	0	0	870	0	1	13	1	0	0	0	9	0	0	4	20	22	0	11	3	21	7	21
Bacteria(100);Actinobacteria(100);Actinobacteria(100);Bifidobacteriales(100);Bifidobacteriaceae(100);Bifidobacterium(100);BeeBifido(100);	HM534861	Bifidobacterium coryneforme strain Amshmt5 16S ribosomal RNA gene, partial sequence	Bifidobacterium from honey bees	ICM3C9K01BAXT9	Otu149	596	165	11	372	0	48	0	1	2	11	0	29	21	2	7	6	25	33	13	8	7	0	0	5	0	0	0	0	0	0	0	2	0	4	0	0	0	0	0	0	0	0	0	0
Bacteria(100);Proteobacteria(100);Gammaproteobacteria(100);Gammaproteobacteria_order_incertae_sedis(97);Gammaproteobacteria_family_incertae_sedis(97);Gamma-1(96);unclassified;	JQ581775	Uncultured gamma proteobacterium clone gAZ107.2_c22 16S ribosomal RNA gene, partial sequence	Gamma 1	ICM3C9K01B88EB	Otu150	6	0	0	5	0	1	0	0	0	0	0	0	0	0	0	0	0	0	0	0	0	0	0	0	0	0	0	0	0	0	0	0	0	0	0	0	0	0	0	0	0	0	0	0
Bacteria(100);Proteobacteria(100);Gammaproteobacteria(100);Gammaproteobacteria_order_incertae_sedis(91);Gammaproteobacteria_family_incertae_sedis(91);unclassified;unclassified;	.	.	Gammaproteobacteria	ICM3C9K01A5790	Otu151	2	0	0	2	0	0	0	0	0	0	0	0	0	0	0	0	0	0	0	0	0	0	0	0	0	0	0	0	0	0	0	0	0	0	0	0	0	0	0	0	0	0	0	0
Bacteria(100);Proteobacteria(100);Gammaproteobacteria(100);Pseudomonadales(99);Pseudomonadaceae(99);unclassified(96);unclassified(96);	JQ437532	Uncultured bacterium clone AMM-9 16S ribosomal RNA gene, partial sequence	Gammaproteobacteria	ICM3C9K01BUVCO	Otu152	68	3	58	6	0	1	0	0	0	0	0	3	0	0	0	0	0	0	0	0	0	0	0	0	57	1	0	0	0	0	0	0	0	0	0	0	0	0	0	0	0	0	0	0
Bacteria(100);Proteobacteria(100);Gammaproteobacteria(100);Enterobacteriales(99);Enterobacteriaceae(99);Arsenophonus(91);unclassified;	DQ837612	Uncultured gamma proteobacterium clone HBG_B4V1-1 16S ribosomal RNA gene, partial sequence	Enterobacteriaceae	ICM3C9K01BQOC3	Otu153	9771	0	2	4	0	6855	2910	0	0	0	0	0	0	0	0	0	0	0	0	0	0	0	0	0	0	2	0	0	0	0	0	0	0	0	0	0	0	0	0	0	0	0	0	0
Bacteria(100);Firmicutes(100);Bacilli(100);Lactobacillales(100);Lactobacillaceae(100);Lactobacillus(100);Firm4(99);	AB810024	Lactobacillus sp. AcjLac3 gene for 16S ribosomal RNA, partial sequence	Firm 4	ICM3C9K01AYK6Z	Otu154	241	31	0	209	0	1	0	1	3	0	0	6	2	1	0	0	0	0	0	11	7	0	0	0	0	0	0	0	0	0	0	0	0	0	0	0	0	0	0	0	0	0	0	0
Bacteria(100);Firmicutes(100);Bacilli(99);Lactobacillales(99);Lactobacillaceae(98);Lactobacillus(98);Firm4(81);	AB810024	Lactobacillus sp. AcjLac3 gene for 16S ribosomal RNA, partial sequence	Firm 4	ICM3C9K01BKIF1	Otu155	13	3	0	10	0	0	0	2	0	0	0	0	0	0	1	0	0	0	0	0	0	0	0	0	0	0	0	0	0	0	0	0	0	0	0	0	0	0	0	0	0	0	0	0
Bacteria(100);Proteobacteria(100);Betaproteobacteria(100);Neisseriales(100);Neisseriaceae(100);Beta(100);unclassified;	KC477411	Uncultured Candidatus Snodgrassella sp. clone BtBU5 16S ribosomal RNA gene, partial sequence	Snodgrassella sp.	ICM3C9K01BVG6P	Otu156	234	102	36	67	0	29	0	0	1	1	0	2	3	1	11	32	7	3	40	1	0	0	0	0	27	0	0	0	0	1	4	0	4	0	0	0	0	0	0	0	0	0	0	0
Bacteria(100);Firmicutes(100);Bacilli(99);Lactobacillales(99);Lactobacillaceae(99);Lactobacillus(99);Firm5(87);	AB810023	Lactobacillus sp. AcjLac1 gene for 16S ribosomal RNA, partial sequence	Firm 5	ICM3C9K01AOP0E	Otu157	1	0	0	1	0	0	0	0	0	0	0	0	0	0	0	0	0	0	0	0	0	0	0	0	0	0	0	0	0	0	0	0	0	0	0	0	0	0	0	0	0	0	0	0
Bacteria(100);Firmicutes(100);Bacilli(100);Lactobacillales(99);Lactobacillaceae(99);Lactobacillus(99);Firm5(97);	AB810023	Lactobacillus sp. AcjLac1 gene for 16S ribosomal RNA, partial sequence	Lactobacillus sp.	ICM3C9K01A2EIC	Otu158	14	4	0	10	0	0	0	0	0	0	0	0	0	1	0	0	0	0	0	2	1	0	0	0	0	0	0	0	0	0	0	0	0	0	0	0	0	0	0	0	0	0	0	0
Bacteria(100);Firmicutes(100);Bacilli(100);Lactobacillales(100);Lactobacillaceae(100);Lactobacillus(100);Firm4(100);	.	.	Firm 4	ICM3C9K01AU8G7	Otu159	5	0	0	5	0	0	0	0	0	0	0	0	0	0	0	0	0	0	0	0	0	0	0	0	0	0	0	0	0	0	0	0	0	0	0	0	0	0	0	0	0	0	0	0
Bacteria(100);Firmicutes(100);Bacilli(100);Lactobacillales(100);Lactobacillaceae(100);Lactobacillus(100);Firm5(100);	AB810023	Lactobacillus sp. AcjLac1 gene for 16S ribosomal RNA, partial sequence	Firm 5	ICM3C9K01BDTI6	Otu160	3	0	0	3	0	0	0	0	0	0	0	0	0	0	0	0	0	0	0	0	0	0	0	0	0	0	0	0	0	0	0	0	0	0	0	0	0	0	0	0	0	0	0	0
Bacteria(100);Firmicutes(100);Bacilli(99);Lactobacillales(99);Lactobacillaceae(99);Lactobacillus(99);Firm5(98);	KC354363	Uncultured Lactobacillus sp. clone G4SXT0Z01AYJLY 16S ribosomal RNA gene, partial sequence	Firm 5	ICM3C9K01BHUJQ	Otu161	17	11	0	4	0	2	0	4	0	0	0	0	0	2	2	0	2	0	0	0	1	0	0	0	0	0	0	0	0	0	0	0	0	0	0	0	0	0	0	0	0	0	0	0
Bacteria(100);Firmicutes(100);Bacilli(100);Lactobacillales(100);Lactobacillaceae(99);Lactobacillus(99);Firm4(99);	AB810024	Lactobacillus sp. AcjLac3 gene for 16S ribosomal RNA, partial sequence	Firm 4	ICM3C9K01BE5ZO	Otu162	7	1	0	6	0	0	0	0	0	0	0	1	0	0	0	0	0	0	0	0	0	0	0	0	0	0	0	0	0	0	0	0	0	0	0	0	0	0	0	0	0	0	0	0
Bacteria(100);Firmicutes(100);Bacilli(100);Lactobacillales(100);Lactobacillaceae(97);Lactobacillus(97);Firm5(94);	.	.	Firm 5	ICM3C9K01AJQTG	Otu163	3	0	0	3	0	0	0	0	0	0	0	0	0	0	0	0	0	0	0	0	0	0	0	0	0	0	0	0	0	0	0	0	0	0	0	0	0	0	0	0	0	0	0	0
Bacteria(100);Proteobacteria(100);Gammaproteobacteria(100);Gammaproteobacteria_order_incertae_sedis(98);Gammaproteobacteria_family_incertae_sedis(98);unclassified;unclassified;	JQ581789	Uncultured gamma proteobacterium clone gMD299.4_c8 16S ribosomal RNA gene, partial sequence	Gammaproteobacteria	ICM3C9K01A14AA	Otu164	12	11	0	1	0	0	0	0	0	0	0	2	0	0	0	1	0	8	0	0	0	0	0	0	0	0	0	0	0	0	0	0	0	0	0	0	0	0	0	0	0	0	0	0
Bacteria(100);Firmicutes(100);Bacilli(100);Lactobacillales(97);Lactobacillaceae(96);Lactobacillus(96);Firm5(91);	KC354363	Uncultured Lactobacillus sp. clone G4SXT0Z01AYJLY 16S ribosomal RNA gene, partial sequence	Firm 5	ICM3C9K01AL83G	Otu165	19	6	0	12	0	1	0	1	0	0	0	0	0	0	0	3	0	1	0	1	0	0	0	0	0	0	0	0	0	0	0	0	0	0	0	0	0	0	0	0	0	0	0	0
Bacteria(100);Firmicutes(100);Bacilli(100);Lactobacillales(100);Lactobacillaceae(100);Lactobacillus(100);Firm4(100);	JQ437511	Uncultured bacterium clone AMH-38 16S ribosomal RNA gene, partial sequence	Firm 4	ICM3C9K01AJQJE	Otu166	6	0	0	6	0	0	0	0	0	0	0	0	0	0	0	0	0	0	0	0	0	0	0	0	0	0	0	0	0	0	0	0	0	0	0	0	0	0	0	0	0	0	0	0
Bacteria(100);Firmicutes(100);Bacilli(99);Lactobacillales(99);Lactobacillaceae(96);Lactobacillus(96);Firm5(85);	.	.	Firm 5	ICM3C9K01BTAJD	Otu167	10	0	0	10	0	0	0	0	0	0	0	0	0	0	0	0	0	0	0	0	0	0	0	0	0	0	0	0	0	0	0	0	0	0	0	0	0	0	0	0	0	0	0	0
Bacteria(100);Firmicutes(100);Bacilli(100);Lactobacillales(100);Lactobacillaceae(100);Lactobacillus(100);unclassified;	.	.	Lactobacillus sp.	ICM3C9K01ANEER	Otu168	1	0	0	1	0	0	0	0	0	0	0	0	0	0	0	0	0	0	0	0	0	0	0	0	0	0	0	0	0	0	0	0	0	0	0	0	0	0	0	0	0	0	0	0
Bacteria(100);Firmicutes(100);Bacilli(100);Lactobacillales(100);Lactobacillaceae(100);Lactobacillus(100);Firm5(95);	AB810023	Lactobacillus sp. AcjLac1 gene for 16S ribosomal RNA, partial sequence	Firm 5	ICM3C9K01BMA89	Otu169	1	0	0	1	0	0	0	0	0	0	0	0	0	0	0	0	0	0	0	0	0	0	0	0	0	0	0	0	0	0	0	0	0	0	0	0	0	0	0	0	0	0	0	0
Bacteria(100);Firmicutes(100);Bacilli(100);Lactobacillales(99);Lactobacillaceae(99);Lactobacillus(99);Firm5(89);	KC354363	Uncultured Lactobacillus sp. clone G4SXT0Z01AYJLY 16S ribosomal RNA gene, partial sequence	Lactobacillus sp.	ICM3C9K01AWOUL	Otu170	9	8	0	1	0	0	0	0	0	1	0	0	0	0	1	0	0	1	1	0	4	0	0	0	0	0	0	0	0	0	0	0	0	0	0	0	0	0	0	0	0	0	0	0
Bacteria(100);Firmicutes(100);Bacilli(100);Lactobacillales(100);Lactobacillaceae(100);Lactobacillus(100);Firm5(90);	AB810039	Lactobacillus sp. AcjLac18 gene for 16S ribosomal RNA, partial sequence	Firm 5	ICM3C9K01BB0H3	Otu171	79	19	0	49	0	11	0	1	3	2	0	4	2	0	1	2	2	0	1	1	0	0	0	0	0	0	0	0	0	0	0	0	0	0	0	0	0	0	0	0	0	0	0	0
Bacteria(100);Firmicutes(100);Bacilli(100);Lactobacillales(100);Lactobacillaceae(100);Lactobacillus(100);Firm4(83);	.	.	Firm 4	ICM3C9K01BP9EN	Otu172	5	0	0	5	0	0	0	0	0	0	0	0	0	0	0	0	0	0	0	0	0	0	0	0	0	0	0	0	0	0	0	0	0	0	0	0	0	0	0	0	0	0	0	0
Bacteria(100);Firmicutes(100);Bacilli(100);Lactobacillales(100);Lactobacillaceae(100);Lactobacillus(100);Firm4(87);	.	.	Firm 4	ICM3C9K01A108K	Otu173	2	0	0	2	0	0	0	0	0	0	0	0	0	0	0	0	0	0	0	0	0	0	0	0	0	0	0	0	0	0	0	0	0	0	0	0	0	0	0	0	0	0	0	0
Bacteria(100);Proteobacteria(100);Alphaproteobacteria(99);Rhodospirillales(99);Acetobacteraceae(99);Alpha2.1(95);unclassified;	HE660714	Uncultured bacterium partial 16S rRNA gene, clone 2231	Alpha 2.1	ICM3C9K01CCLBT	Otu174	7	3	0	4	0	0	0	1	1	0	0	0	0	1	0	0	0	0	0	0	0	0	0	0	0	0	0	0	0	0	0	0	0	0	0	0	0	0	0	0	0	0	0	0
Bacteria(100);Firmicutes(100);Bacilli(99);Lactobacillales(94);Lactobacillaceae(93);Lactobacillus(92);Firm5(83);	AB810023	Lactobacillus sp. AcjLac1 gene for 16S ribosomal RNA, partial sequence	Firm 5	ICM3C9K01B301Z	Otu175	7	3	0	4	0	0	0	0	0	0	0	3	0	0	0	0	0	0	0	0	0	0	0	0	0	0	0	0	0	0	0	0	0	0	0	0	0	0	0	0	0	0	0	0
Bacteria(100);Proteobacteria(100);Betaproteobacteria(100);Neisseriales(93);Neisseriaceae(93);unclassified;unclassified;	KC477411	Uncultured Candidatus Snodgrassella sp. clone BtBU5 16S ribosomal RNA gene, partial sequence	Snodgrassella sp.	ICM3C9K01CCWDU	Otu176	1	0	0	1	0	0	0	0	0	0	0	0	0	0	0	0	0	0	0	0	0	0	0	0	0	0	0	0	0	0	0	0	0	0	0	0	0	0	0	0	0	0	0	0
Bacteria(100);Firmicutes(100);Bacilli(100);Lactobacillales(100);Lactobacillaceae(100);Lactobacillus(95);unclassified;	.	.	Lactobacillus sp.	ICM3C9K01BQIYF	Otu177	13	1	0	12	0	0	0	0	0	0	0	1	0	0	0	0	0	0	0	0	0	0	0	0	0	0	0	0	0	0	0	0	0	0	0	0	0	0	0	0	0	0	0	0
Bacteria(100);Firmicutes(100);Bacilli(100);Lactobacillales(100);Lactobacillaceae(100);Lactobacillus(100);Firm5(99);	AB810023	Lactobacillus sp. AcjLac1 gene for 16S ribosomal RNA, partial sequence	Firm 5	ICM3C9K01BZCN1	Otu178	23	6	0	15	0	2	0	0	1	0	0	0	0	0	1	1	0	1	1	0	1	0	0	0	0	0	0	0	0	0	0	0	0	0	0	0	0	0	0	0	0	0	0	0
Bacteria(100);Firmicutes(100);Bacilli(100);Lactobacillales(100);Lactobacillaceae(100);Lactobacillus(100);Firm5(100);	AB810023	Lactobacillus sp. AcjLac1 gene for 16S ribosomal RNA, partial sequence	Firm 5	ICM3C9K01AZFTT	Otu179	36	24	0	11	0	1	0	2	1	0	0	2	2	1	5	0	1	4	1	0	5	0	0	0	0	0	0	0	0	0	0	0	0	0	0	0	0	0	0	0	0	0	0	0
Bacteria(100);Firmicutes(100);Bacilli(100);Lactobacillales(96);Lactobacillaceae(96);Lactobacillus(96);Firm5(89);	.	.	Firm 5	ICM3C9K01BR1J3	Otu180	4	1	0	2	0	1	0	0	0	0	0	0	0	0	0	0	0	1	0	0	0	0	0	0	0	0	0	0	0	0	0	0	0	0	0	0	0	0	0	0	0	0	0	0
Bacteria(100);Firmicutes(100);Bacilli(100);Lactobacillales(100);Lactobacillaceae(99);Lactobacillus(99);Firm4(95);	.	.	Firm 4	ICM3C9K01CCDEQ	Otu181	1	0	0	1	0	0	0	0	0	0	0	0	0	0	0	0	0	0	0	0	0	0	0	0	0	0	0	0	0	0	0	0	0	0	0	0	0	0	0	0	0	0	0	0
Bacteria(100);Firmicutes(100);Bacilli(99);Lactobacillales(99);Lactobacillaceae(98);Lactobacillus(96);unclassified;	.	.	Lactobacillus sp.	ICM3C9K01B9HXP	Otu182	2	0	0	2	0	0	0	0	0	0	0	0	0	0	0	0	0	0	0	0	0	0	0	0	0	0	0	0	0	0	0	0	0	0	0	0	0	0	0	0	0	0	0	0
Bacteria(100);Firmicutes(100);Bacilli(99);Lactobacillales(99);Lactobacillaceae(99);Lactobacillus(99);Firm4(91);	HM113352	Uncultured Lactobacillus sp. clone SHOG756 16S ribosomal RNA gene, partial sequence	Firm 4	ICM3C9K01A5CII	Otu183	5	0	0	5	0	0	0	0	0	0	0	0	0	0	0	0	0	0	0	0	0	0	0	0	0	0	0	0	0	0	0	0	0	0	0	0	0	0	0	0	0	0	0	0
Bacteria(100);Firmicutes(100);Bacilli(100);Lactobacillales(100);Lactobacillaceae(100);Lactobacillus(100);Firm5(86);	AB810039	Lactobacillus sp. AcjLac18 gene for 16S ribosomal RNA, partial sequence	Firm 5	ICM3C9K01AZ7V8	Otu184	4	0	0	2	0	2	0	0	0	0	0	0	0	0	0	0	0	0	0	0	0	0	0	0	0	0	0	0	0	0	0	0	0	0	0	0	0	0	0	0	0	0	0	0
Bacteria(100);Proteobacteria(100);Gammaproteobacteria(100);Gammaproteobacteria_order_incertae_sedis(98);Gammaproteobacteria_family_incertae_sedis(98);unclassified;unclassified;	.	.	Gammaproteobacteria	ICM3C9K01B5O1A	Otu185	1	0	0	1	0	0	0	0	0	0	0	0	0	0	0	0	0	0	0	0	0	0	0	0	0	0	0	0	0	0	0	0	0	0	0	0	0	0	0	0	0	0	0	0
Bacteria(100);Firmicutes(100);Bacilli(100);Lactobacillales(100);Lactobacillaceae(100);Lactobacillus(100);Firm4(97);	.	.	Firm 4	ICM3C9K01A1M3V	Otu186	5	0	0	5	0	0	0	0	0	0	0	0	0	0	0	0	0	0	0	0	0	0	0	0	0	0	0	0	0	0	0	0	0	0	0	0	0	0	0	0	0	0	0	0
Bacteria(100);Firmicutes(100);Bacilli(100);Lactobacillales(99);Lactobacillaceae(98);Lactobacillus(98);unclassified;	.	.	Lactobacillus sp.	ICM3C9K01BO4HJ	Otu187	4	0	0	4	0	0	0	0	0	0	0	0	0	0	0	0	0	0	0	0	0	0	0	0	0	0	0	0	0	0	0	0	0	0	0	0	0	0	0	0	0	0	0	0
Bacteria(100);Firmicutes(100);Bacilli(100);Lactobacillales(100);Lactobacillaceae(100);Lactobacillus(100);Firm4(98);	.	.	Firm 4	ICM3C9K01A9VPI	Otu188	1	0	0	1	0	0	0	0	0	0	0	0	0	0	0	0	0	0	0	0	0	0	0	0	0	0	0	0	0	0	0	0	0	0	0	0	0	0	0	0	0	0	0	0
Bacteria(100);Firmicutes(100);Bacilli(100);Lactobacillales(100);Lactobacillaceae(99);Lactobacillus(99);Firm4(96);	.	.	Firm 4	ICM3C9K01AZ0TW	Otu189	2	0	0	2	0	0	0	0	0	0	0	0	0	0	0	0	0	0	0	0	0	0	0	0	0	0	0	0	0	0	0	0	0	0	0	0	0	0	0	0	0	0	0	0
Bacteria(100);Firmicutes(100);Bacilli(100);Lactobacillales(100);Lactobacillaceae(99);Lactobacillus(99);Firm4(97);	.	.	Firm 4	ICM3C9K01B5WFL	Otu190	2	0	0	2	0	0	0	0	0	0	0	0	0	0	0	0	0	0	0	0	0	0	0	0	0	0	0	0	0	0	0	0	0	0	0	0	0	0	0	0	0	0	0	0
Bacteria(100);Firmicutes(100);Bacilli(100);Lactobacillales(100);Lactobacillaceae(99);Lactobacillus(91);unclassified;	.	.	Lactobacillus sp.	ICM3C9K01BVZL9	Otu191	2	0	0	2	0	0	0	0	0	0	0	0	0	0	0	0	0	0	0	0	0	0	0	0	0	0	0	0	0	0	0	0	0	0	0	0	0	0	0	0	0	0	0	0
Bacteria(100);Firmicutes(100);Bacilli(100);Lactobacillales(100);Lactobacillaceae(100);Lactobacillus(99);Firm4(96);	.	.	Firm 4	ICM3C9K01BQNVJ	Otu192	1	0	0	1	0	0	0	0	0	0	0	0	0	0	0	0	0	0	0	0	0	0	0	0	0	0	0	0	0	0	0	0	0	0	0	0	0	0	0	0	0	0	0	0
Bacteria(100);Firmicutes(100);Bacilli(100);Lactobacillales(100);Lactobacillaceae(99);Lactobacillus(99);Firm5(94);	HM113114	Uncultured Lactobacillus sp. clone SHOG418 16S ribosomal RNA gene, partial sequence	Firm 5	ICM3C9K01AGZ03	Otu193	3	1	0	2	0	0	0	0	0	0	0	0	0	0	0	0	0	1	0	0	0	0	0	0	0	0	0	0	0	0	0	0	0	0	0	0	0	0	0	0	0	0	0	0
Bacteria(100);Proteobacteria(100);Gammaproteobacteria(99);Pseudomonadales(92);Pseudomonadaceae(92);unclassified(92);unclassified(92);	JQ437532	Uncultured bacterium clone AMM-9 16S ribosomal RNA gene, partial sequence	Gammaproteobacteria	ICM3C9K01B0BZP	Otu194	1	0	0	1	0	0	0	0	0	0	0	0	0	0	0	0	0	0	0	0	0	0	0	0	0	0	0	0	0	0	0	0	0	0	0	0	0	0	0	0	0	0	0	0
Bacteria(100);Actinobacteria(100);Actinobacteria(100);Actinomycetales(100);Corynebacteriaceae(83);Corynebacterium(83);unclassified;	JX637079	Uncultured bacterium clone HBYTM9302GUOUC 16S ribosomal RNA gene, partial sequence	Actinomycetales	ICM3C9K01B0XDS	Otu195	516	0	511	2	1	1	1	0	0	0	0	0	0	0	0	0	0	0	0	0	0	0	2	0	0	3	4	499	0	0	0	0	3	0	0	0	0	0	0	0	0	0	0	0
Bacteria(100);Firmicutes(100);Bacilli(100);Lactobacillales(100);Lactobacillaceae(100);Lactobacillus(100);Firm4(100);	.	.	Firm 4	ICM3C9K01BT5CB	Otu196	1	0	0	1	0	0	0	0	0	0	0	0	0	0	0	0	0	0	0	0	0	0	0	0	0	0	0	0	0	0	0	0	0	0	0	0	0	0	0	0	0	0	0	0
Bacteria(100);Firmicutes(100);Bacilli(100);Lactobacillales(100);Lactobacillaceae(100);Lactobacillus(100);unclassified;	.	.	Lactobacillus sp.	ICM3C9K01AV4CP	Otu197	1	0	0	1	0	0	0	0	0	0	0	0	0	0	0	0	0	0	0	0	0	0	0	0	0	0	0	0	0	0	0	0	0	0	0	0	0	0	0	0	0	0	0	0
Bacteria(100);Firmicutes(100);Bacilli(100);Lactobacillales(100);Lactobacillaceae(99);Lactobacillus(90);Firm4(81);	.	.	Firm 4	ICM3C9K01BBUAE	Otu198	1	0	0	1	0	0	0	0	0	0	0	0	0	0	0	0	0	0	0	0	0	0	0	0	0	0	0	0	0	0	0	0	0	0	0	0	0	0	0	0	0	0	0	0
Bacteria(100);Firmicutes(100);Bacilli(100);Lactobacillales(100);Lactobacillaceae(100);Lactobacillus(100);Firm4(98);	HE613304	Uncultured bacterium partial 16S rRNA gene, clone 73_15	Firm 4	ICM3C9K01BUV4A	Otu199	4	0	0	4	0	0	0	0	0	0	0	0	0	0	0	0	0	0	0	0	0	0	0	0	0	0	0	0	0	0	0	0	0	0	0	0	0	0	0	0	0	0	0	0
Bacteria(100);Firmicutes(100);Bacilli(99);Lactobacillales(98);Lactobacillaceae(98);Lactobacillus(98);unclassified;	.	.	Lactobacillus sp.	ICM3C9K01AUFYG	Otu200	3	0	0	3	0	0	0	0	0	0	0	0	0	0	0	0	0	0	0	0	0	0	0	0	0	0	0	0	0	0	0	0	0	0	0	0	0	0	0	0	0	0	0	0
Bacteria(100);Firmicutes(100);Bacilli(100);Lactobacillales(100);Lactobacillaceae(99);Lactobacillus(98);Firm4(91);	AB810024	Lactobacillus sp. AcjLac3 gene for 16S ribosomal RNA, partial sequence	Firm 4	ICM3C9K01AOHPQ	Otu201	1	0	0	1	0	0	0	0	0	0	0	0	0	0	0	0	0	0	0	0	0	0	0	0	0	0	0	0	0	0	0	0	0	0	0	0	0	0	0	0	0	0	0	0
Bacteria(100);Firmicutes(100);Bacilli(98);Lactobacillales(98);Lactobacillaceae(98);Lactobacillus(98);Firm4(91);	AB810024	Lactobacillus sp. AcjLac3 gene for 16S ribosomal RNA, partial sequence	Firm 4	ICM3C9K01AM2R8	Otu202	20	4	0	16	0	0	0	1	0	0	0	3	0	0	0	0	0	0	0	0	0	0	0	0	0	0	0	0	0	0	0	0	0	0	0	0	0	0	0	0	0	0	0	0
Bacteria(100);Proteobacteria(100);Gammaproteobacteria(100);Gammaproteobacteria_order_incertae_sedis(100);Gammaproteobacteria_family_incertae_sedis(100);Gamma2(89);unclassified;	JX878306	Frischella perrara strain PEB0191 16S ribosomal RNA gene, partial sequence	Gamma 2	ICM3C9K01A5JHU	Otu203	1	0	0	1	0	0	0	0	0	0	0	0	0	0	0	0	0	0	0	0	0	0	0	0	0	0	0	0	0	0	0	0	0	0	0	0	0	0	0	0	0	0	0	0
Bacteria(100);Firmicutes(100);Bacilli(98);Lactobacillales(98);Lactobacillaceae(98);Lactobacillus(96);Firm4(94);	AB810024	Lactobacillus sp. AcjLac3 gene for 16S ribosomal RNA, partial sequence	Firm 4	H3QVG8204IXZHX	Otu204	6	5	0	1	0	0	0	2	1	0	0	0	1	1	0	0	0	0	0	0	0	0	0	0	0	0	0	0	0	0	0	0	0	0	0	0	0	0	0	0	0	0	0	0
Bacteria(100);Proteobacteria(100);Betaproteobacteria(100);Neisseriales(100);Neisseriaceae(100);Beta(100);unclassified;	KC477411	Uncultured Candidatus Snodgrassella sp. clone BtBU5 16S ribosomal RNA gene, partial sequence	Snodgrassella sp.	H3QVG8204I9DLL	Otu205	12	7	0	5	0	0	0	1	0	0	0	0	0	0	1	1	0	0	1	3	0	0	0	0	0	0	0	0	0	0	0	0	0	0	0	0	0	0	0	0	0	0	0	0
Bacteria(100);Proteobacteria(100);Alphaproteobacteria(100);Sphingomonadales(100);Sphingomonadaceae(100);Sphingobium(98);unclassified;	KC873421	Uncultured bacterium clone S61_016 16S ribosomal RNA gene, partial sequence	Alphaproteobacteria	H3QVG8204IIOA9	Otu206	8	1	7	0	0	0	0	0	1	0	0	0	0	0	0	0	0	0	0	0	0	0	0	0	0	0	0	0	5	0	0	0	2	0	0	0	0	0	0	0	0	0	0	0
Bacteria(100);Firmicutes(100);Bacilli(100);Lactobacillales(97);Lactobacillaceae(97);Lactobacillus(96);Firm5(83);	AB810023	Lactobacillus sp. AcjLac1 gene for 16S ribosomal RNA, partial sequence	Firm 5	H3QVG8204JAUSJ	Otu207	3	1	0	2	0	0	0	0	1	0	0	0	0	0	0	0	0	0	0	0	0	0	0	0	0	0	0	0	0	0	0	0	0	0	0	0	0	0	0	0	0	0	0	0
Bacteria(100);Proteobacteria(100);Gammaproteobacteria(100);Pseudomonadales(99);Pseudomonadaceae(99);unclassified(98);unclassified(98);	JQ437532	Uncultured bacterium clone AMM-9 16S ribosomal RNA gene, partial sequence	Gammaproteobacteria	H3QVG8204ITGHY	Otu208	9	9	0	0	0	0	0	0	0	0	0	9	0	0	0	0	0	0	0	0	0	0	0	0	0	0	0	0	0	0	0	0	0	0	0	0	0	0	0	0	0	0	0	0
Bacteria(100);Firmicutes(100);Bacilli(100);Lactobacillales(100);Lactobacillaceae(100);Lactobacillus(100);Firm5(99);	FJ861329	Lactobacillus sp. SDR1 16S ribosomal RNA gene, partial sequence	Firm 5	H3QVG8204I04XE	Otu209	10	6	0	1	0	3	0	1	2	0	0	2	0	0	1	0	0	0	0	0	0	0	0	0	0	0	0	0	0	0	0	0	0	0	0	0	0	0	0	0	0	0	0	0
Bacteria(100);Proteobacteria(100);Gammaproteobacteria(100);Pseudomonadales(80);Pseudomonadaceae(80);unclassified(80);unclassified(80);	JQ437532	Uncultured bacterium clone AMM-9 16S ribosomal RNA gene, partial sequence	Gammaproteobacteria	H3QVG8204I8PBL	Otu210	1	1	0	0	0	0	0	0	0	0	0	1	0	0	0	0	0	0	0	0	0	0	0	0	0	0	0	0	0	0	0	0	0	0	0	0	0	0	0	0	0	0	0	0
Bacteria(100);Proteobacteria(100);Gammaproteobacteria(100);Gammaproteobacteria_order_incertae_sedis(100);Gammaproteobacteria_family_incertae_sedis(100);Gamma-1Gilliamella(86);unclassified;	HE660964	Uncultured bacterium partial 16S rRNA gene, clone 29850	Gamma 1 Gilliamella apicola (Gamma 1)	H3QVG8204JAZ1H	Otu211	6886	146	5	2	0	6727	6	0	0	1	0	99	43	1	0	1	0	1	0	0	0	0	0	0	0	0	0	0	0	1	0	0	0	4	0	0	0	0	0	0	0	0	0	0
Bacteria(100);Firmicutes(100);Bacilli(99);Lactobacillales(98);Lactobacillaceae(97);Lactobacillus(97);Firm5(92);	HM534786	Lactobacillus sp. Adhmro12 16S ribosomal RNA gene, partial sequence	Lactobacillus sp.	H3QVG8204IADQ4	Otu212	7	2	0	0	5	0	0	0	0	0	0	1	0	0	0	0	0	0	0	0	1	0	0	0	0	0	0	0	0	0	0	0	0	0	0	5	0	0	0	0	0	0	0	0
Bacteria(100);Firmicutes(100);Bacilli(100);Lactobacillales(100);Lactobacillaceae(100);Lactobacillus(100);Firm5(93);	AB810023	Lactobacillus sp. AcjLac1 gene for 16S ribosomal RNA, partial sequence	Firm 5	H3QVG8204IFW5L	Otu213	9	4	0	5	0	0	0	0	0	0	0	1	0	0	0	0	0	0	0	1	2	0	0	0	0	0	0	0	0	0	0	0	0	0	0	0	0	0	0	0	0	0	0	0
Bacteria(100);Proteobacteria(100);Gammaproteobacteria(100);Gammaproteobacteria_order_incertae_sedis(99);Gammaproteobacteria_family_incertae_sedis(99);Gamma-1(95);unclassified;	JQ581795	Uncultured gamma proteobacterium clone gMD216.5_c23 16S ribosomal RNA gene, partial sequence	Gamma 1	H3QVG8204JZXLR	Otu214	12	7	0	4	0	1	0	0	0	0	0	2	0	1	2	0	0	0	1	1	0	0	0	0	0	0	0	0	0	0	0	0	0	0	0	0	0	0	0	0	0	0	0	0
Bacteria(100);Bacteroidetes(100);Bacteroidia(100);Bacteroidales(100);Prevotellaceae(100);Prevotella(100);Prevotella_histicola(84);	JQ997334	Uncultured Prevotella sp. clone GKJWQY101BZ91A 16S ribosomal RNA gene, partial sequence	other	H3QVG8204JAXCO	Otu215	1	1	0	0	0	0	0	0	0	0	0	0	1	0	0	0	0	0	0	0	0	0	0	0	0	0	0	0	0	0	0	0	0	0	0	0	0	0	0	0	0	0	0	0
Bacteria(100);Proteobacteria(100);Gammaproteobacteria(99);Gammaproteobacteria_order_incertae_sedis(98);Gammaproteobacteria_family_incertae_sedis(98);Gamma2(87);unclassified;	JX878306	Frischella perrara strain PEB0191 16S ribosomal RNA gene, partial sequence	Gamma 2 Frishchella perrara (Gamma 2)	H3QVG8204IKMV8	Otu216	1	1	0	0	0	0	0	0	0	0	0	0	1	0	0	0	0	0	0	0	0	0	0	0	0	0	0	0	0	0	0	0	0	0	0	0	0	0	0	0	0	0	0	0
Bacteria(100);Firmicutes(100);Bacilli(99);Lactobacillales(99);Lactobacillaceae(99);Lactobacillus(99);Firm5(90);	.	.	Firm 5	H3QVG8204JRQO1	Otu217	1	1	0	0	0	0	0	0	0	0	0	0	1	0	0	0	0	0	0	0	0	0	0	0	0	0	0	0	0	0	0	0	0	0	0	0	0	0	0	0	0	0	0	0
Bacteria(100);Firmicutes(100);Bacilli(100);Lactobacillales(99);Lactobacillaceae(99);Lactobacillus(99);Firm5(98);	AB810039	Lactobacillus sp. AcjLac18 gene for 16S ribosomal RNA, partial sequence	Lactobacillus sp.	H3QVG8204H9EQY	Otu218	3	1	0	2	0	0	0	0	0	0	0	0	0	1	0	0	0	0	0	0	0	0	0	0	0	0	0	0	0	0	0	0	0	0	0	0	0	0	0	0	0	0	0	0
Bacteria(100);Proteobacteria(100);Alphaproteobacteria(99);Rhodospirillales(99);Acetobacteraceae(99);Alpha2.1(92);unclassified;	.	.	Alpha 2.1	H3QVG8204J07AE	Otu219	1	1	0	0	0	0	0	0	0	0	0	0	0	1	0	0	0	0	0	0	0	0	0	0	0	0	0	0	0	0	0	0	0	0	0	0	0	0	0	0	0	0	0	0
Bacteria(100);Proteobacteria(100);Gammaproteobacteria(98);Gammaproteobacteria_order_incertae_sedis(91);Gammaproteobacteria_family_incertae_sedis(91);unclassified;unclassified;	.	.	Gammaproteobacteria	H3QVG8204I0PTV	Otu220	1	1	0	0	0	0	0	0	0	0	0	0	0	1	0	0	0	0	0	0	0	0	0	0	0	0	0	0	0	0	0	0	0	0	0	0	0	0	0	0	0	0	0	0
Bacteria(100);Firmicutes(100);Bacilli(100);Lactobacillales(100);Lactobacillaceae(100);Lactobacillus(100);Firm5(91);	AB810039	Lactobacillus sp. AcjLac18 gene for 16S ribosomal RNA, partial sequence	Firm 5	H3QVG8204JLPZR	Otu221	1	1	0	0	0	0	0	0	0	0	0	0	0	0	1	0	0	0	0	0	0	0	0	0	0	0	0	0	0	0	0	0	0	0	0	0	0	0	0	0	0	0	0	0
Bacteria(100);Firmicutes(100);Bacilli(100);Lactobacillales(100);Lactobacillaceae(100);Lactobacillus(100);Firm5(100);	AB810039	Lactobacillus sp. AcjLac18 gene for 16S ribosomal RNA, partial sequence	Firm 5	H3QVG8204JNJ7G	Otu222	13	5	0	7	1	0	0	0	0	0	0	2	0	0	1	2	0	0	0	0	0	0	0	0	0	0	0	0	0	0	0	0	0	0	0	0	0	0	0	0	0	0	0	1
Bacteria(100);Proteobacteria(100);Betaproteobacteria(99);Neisseriales(93);Neisseriaceae(93);unclassified;unclassified;	KC477411	Uncultured Candidatus Snodgrassella sp. clone BtBU5 16S ribosomal RNA gene, partial sequence	other	H3QVG8204IWPDX	Otu223	3	2	0	1	0	0	0	0	1	0	0	0	0	0	0	1	0	0	0	0	0	0	0	0	0	0	0	0	0	0	0	0	0	0	0	0	0	0	0	0	0	0	0	0
Bacteria(100);Proteobacteria(100);Gammaproteobacteria(100);unclassified;unclassified;unclassified;unclassified;	JQ581789	Uncultured gamma proteobacterium clone gMD299.4_c8 16S ribosomal RNA gene, partial sequence	Gammaproteobacteria	H3QVG8204I42ZJ	Otu224	1	1	0	0	0	0	0	0	0	0	0	0	0	0	0	1	0	0	0	0	0	0	0	0	0	0	0	0	0	0	0	0	0	0	0	0	0	0	0	0	0	0	0	0
Bacteria(100);Firmicutes(100);Clostridia(100);Clostridiales(100);Veillonellaceae(99);Veillonella(99);unclassified;	JX642994	Uncultured bacterium clone HBYTM9301CEK9K 16S ribosomal RNA gene, partial sequence	Firmicutes	H3QVG8204I7643	Otu225	1	1	0	0	0	0	0	0	0	0	0	0	0	0	0	1	0	0	0	0	0	0	0	0	0	0	0	0	0	0	0	0	0	0	0	0	0	0	0	0	0	0	0	0
Bacteria(100);Firmicutes(100);Bacilli(98);Lactobacillales(98);Lactobacillaceae(98);Lactobacillus(98);Firm5(84);	.	.	Firm 5	H3QVG8204IE29L	Otu226	2	2	0	0	0	0	0	0	0	0	0	0	0	0	0	0	2	0	0	0	0	0	0	0	0	0	0	0	0	0	0	0	0	0	0	0	0	0	0	0	0	0	0	0
Bacteria(100);Proteobacteria(100);Betaproteobacteria(100);Neisseriales(100);Neisseriaceae(100);Beta(100);unclassified;	KC477411	Uncultured Candidatus Snodgrassella sp. clone BtBU5 16S ribosomal RNA gene, partial sequence	Snodgrassella sp.	H3QVG8204IIH9O	Otu227	88	49	0	24	1	14	0	0	1	2	0	1	1	0	10	6	1	2	24	0	1	0	0	0	0	0	0	0	0	0	0	0	0	0	0	0	0	0	0	0	0	0	0	0
Bacteria(100);Proteobacteria(100);Gammaproteobacteria(100);Gammaproteobacteria_order_incertae_sedis(94);Gammaproteobacteria_family_incertae_sedis(94);unclassified;unclassified;	.	.	Gammaproteobacteria	H3QVG8204IMO93	Otu228	1	1	0	0	0	0	0	0	0	0	0	0	0	0	0	0	1	0	0	0	0	0	0	0	0	0	0	0	0	0	0	0	0	0	0	0	0	0	0	0	0	0	0	0
Bacteria(100);Actinobacteria(100);Actinobacteria(100);Actinomycetales(100);Propionibacteriaceae(100);Propionibacterium(100);Propionibacterium_granulosum(100);	KC873330	Uncultured bacterium clone S51_076 16S ribosomal RNA gene, partial sequence	Actinomycetales	H3QVG8204JPL3V	Otu229	1	1	0	0	0	0	0	0	0	0	0	0	0	0	0	0	1	0	0	0	0	0	0	0	0	0	0	0	0	0	0	0	0	0	0	0	0	0	0	0	0	0	0	0
Bacteria(100);Firmicutes(100);Bacilli(100);Lactobacillales(100);Lactobacillaceae(100);Lactobacillus(100);Firm5(94);	KC354363	Uncultured Lactobacillus sp. clone G4SXT0Z01AYJLY 16S ribosomal RNA gene, partial sequence	Firm 5	H3QVG8204J4AT4	Otu230	3	3	0	0	0	0	0	1	0	0	0	0	0	0	0	1	1	0	0	0	0	0	0	0	0	0	0	0	0	0	0	0	0	0	0	0	0	0	0	0	0	0	0	0
Bacteria(100);Proteobacteria(100);Betaproteobacteria(100);Neisseriales(95);Neisseriaceae(95);unclassified;unclassified;	JQ746645	Snodgrassella alvi strain wkB12 16S ribosomal RNA gene, complete sequence	Snodgrassella alvi (Beta)	H3QVG8204JKD21	Otu231	1	1	0	0	0	0	0	0	0	0	0	0	0	0	0	0	0	0	1	0	0	0	0	0	0	0	0	0	0	0	0	0	0	0	0	0	0	0	0	0	0	0	0	0
Bacteria(100);Proteobacteria(100);Betaproteobacteria(100);Neisseriales(96);Neisseriaceae(96);unclassified;unclassified;	JQ581959	Uncultured beta proteobacterium clone bMD365.2_c11 16S ribosomal RNA gene, partial sequence	other	H3QVG8204IWQGY	Otu232	1	1	0	0	0	0	0	0	0	0	0	0	0	0	0	0	0	0	1	0	0	0	0	0	0	0	0	0	0	0	0	0	0	0	0	0	0	0	0	0	0	0	0	0
Bacteria(100);Proteobacteria(100);Betaproteobacteria(99);unclassified;unclassified;unclassified;unclassified;	.	.	other	H3QVG8204H6P29	Otu233	8	8	0	0	0	0	0	0	0	1	0	0	0	0	1	0	0	0	5	1	0	0	0	0	0	0	0	0	0	0	0	0	0	0	0	0	0	0	0	0	0	0	0	0
Bacteria(100);Firmicutes(100);Bacilli(100);Lactobacillales(98);Lactobacillaceae(98);Lactobacillus(98);Firm5(96);	AB810039	Lactobacillus sp. AcjLac18 gene for 16S ribosomal RNA, partial sequence	Firm 5	H3QVG8204IVIP1	Otu234	1	1	0	0	0	0	0	0	0	0	0	0	0	0	0	0	0	0	0	0	1	0	0	0	0	0	0	0	0	0	0	0	0	0	0	0	0	0	0	0	0	0	0	0
Bacteria(100);Firmicutes(100);Bacilli(100);Lactobacillales(100);Lactobacillaceae(95);Lactobacillus(95);unclassified;	HM113352	Uncultured Lactobacillus sp. clone SHOG756 16S ribosomal RNA gene, partial sequence	Lactobacillus sp.	H3QVG8204H4AL9	Otu235	2	1	0	1	0	0	0	0	0	0	0	0	0	0	0	0	0	0	0	0	1	0	0	0	0	0	0	0	0	0	0	0	0	0	0	0	0	0	0	0	0	0	0	0
Bacteria(100);Bacteroidetes(100);Sphingobacteria(98);Sphingobacteriales(98);Chitinophagaceae(98);unclassified;unclassified;	KC990536	Uncultured bacterium clone ZZQ1B-75 16S ribosomal RNA gene, partial sequence	other	H3QVG8203G1U5Y	Otu236	100	0	100	0	0	0	0	0	0	0	0	0	0	0	0	0	0	0	0	0	0	2	0	15	0	17	6	1	6	12	2	0	9	29	1	0	0	0	0	0	0	0	0	0
Bacteria(100);Chloroflexi(100);Chloroflexi(100);Herpetosiphonales(100);Herpetosiphonaceae(100);Herpetosiphon(100);unclassified(100);	NR_074236	Herpetosiphon aurantiacus DSM 785 16S ribosomal RNA, complete sequence	other	H3QVG8203G9M9T	Otu237	2	0	2	0	0	0	0	0	0	0	0	0	0	0	0	0	0	0	0	0	0	2	0	0	0	0	0	0	0	0	0	0	0	0	0	0	0	0	0	0	0	0	0	0
Bacteria(100);Bacteroidetes(100);unclassified;unclassified;unclassified;unclassified;unclassified;	JQ374863	Uncultured bacterium clone NT51d2_21143 16S ribosomal RNA gene, partial sequence	other	H3QVG8203GACR9	Otu238	5	0	5	0	0	0	0	0	0	0	0	0	0	0	0	0	0	0	0	0	0	1	0	0	0	0	0	0	3	0	1	0	0	0	0	0	0	0	0	0	0	0	0	0
Bacteria(100);Proteobacteria(100);Alphaproteobacteria(100);Rhizobiales(95);Bradyrhizobiaceae(90);unclassified;unclassified;	HQ482683	Uncultured bacterium clone Pohang_WWTP_December.2005_3907 16S ribosomal RNA gene, partial sequence	Alphaproteobacteria	H3QVG8203GRM94	Otu239	1	0	1	0	0	0	0	0	0	0	0	0	0	0	0	0	0	0	0	0	0	1	0	0	0	0	0	0	0	0	0	0	0	0	0	0	0	0	0	0	0	0	0	0
Bacteria(100);Chloroflexi(100);SOGA31(100);unclassified(100);unclassified(100);unclassified(100);unclassified(100);	JQ401530	Uncultured Chloroflexi bacterium clone CNY_01647 16S ribosomal RNA gene, partial sequence	other	H3QVG8203G72K5	Otu240	28	0	25	0	1	0	2	0	0	0	0	0	0	0	0	0	0	0	0	0	0	1	1	0	0	2	7	0	0	0	1	0	3	10	0	0	0	0	0	0	1	0	0	0
Bacteria(100);Actinobacteria(100);Actinobacteria(100);Actinomycetales(100);Glycomycetaceae(100);Glycomyces(100);unclassified;	HF585148	Glycomyces lechevalierae partial 16S rRNA gene, isolate C34	Actinomycetales	H3QVG8203FM3GH	Otu241	1	0	1	0	0	0	0	0	0	0	0	0	0	0	0	0	0	0	0	0	0	1	0	0	0	0	0	0	0	0	0	0	0	0	0	0	0	0	0	0	0	0	0	0
Bacteria(100);Bacteroidetes(100);Sphingobacteria(100);Sphingobacteriales(100);Cyclobacteriaceae(99);Aquiflexum(90);unclassified(90);	FJ754870	Uncultured Bacteroidetes bacterium clone Aerocomp_Ni203 16S ribosomal RNA gene, partial sequence	other	H3QVG8203FUQCI	Otu242	8	0	8	0	0	0	0	0	0	0	0	0	0	0	0	0	0	0	0	0	0	1	0	0	0	1	0	3	0	0	0	0	3	0	0	0	0	0	0	0	0	0	0	0
Bacteria(100);Proteobacteria(100);Alphaproteobacteria(100);Sphingomonadales(100);Sphingomonadaceae(100);Sphingomonas(91);unclassified;	KC625324	Uncultured bacterium clone T2S303H11 16S ribosomal RNA gene, partial sequence	Alphaproteobacteria	H3QVG8203GX7D5	Otu243	15	0	13	0	2	0	0	0	0	0	0	0	0	0	0	0	0	0	0	0	0	1	1	0	0	0	0	3	0	0	2	0	2	4	0	2	0	0	0	0	0	0	0	0
Bacteria(100);Firmicutes(100);Bacilli(100);Bacillales(100);unclassified;unclassified;unclassified;	JX543676	Uncultured bacterium clone SeqID146 16S ribosomal RNA gene, partial sequence	Firmicutes	H3QVG8203FYR3W	Otu244	2097	2	2044	0	48	2	1	0	0	0	0	0	0	2	0	0	0	0	0	0	0	0	7	3	0	16	5	1920	3	13	9	2	12	51	3	0	2	4	0	1	0	1	0	31
Bacteria(100);Firmicutes(100);Bacilli(99);Bacillales(99);Planococcaceae(97);unclassified;unclassified;	JX298464	Bacillus sp. 1961BAB 16S ribosomal RNA gene, partial sequence	Firmicutes	H3QVG8203FSQ00	Otu245	61	0	60	0	0	0	1	0	0	0	0	0	0	0	0	0	0	0	0	0	0	0	6	0	0	1	41	6	0	0	0	0	6	0	0	0	0	0	0	0	0	0	0	0
Bacteria(100);Actinobacteria(100);Actinobacteria(100);Actinomycetales(100);Micromonosporaceae(100);unclassified;unclassified;	KC447702	Uncultured actinobacterium clone RLBp4959 16S ribosomal RNA gene, partial sequence	Actinomycetales	H3QVG8203F1ZA2	Otu246	2	0	2	0	0	0	0	0	0	0	0	0	0	0	0	0	0	0	0	0	0	0	2	0	0	0	0	0	0	0	0	0	0	0	0	0	0	0	0	0	0	0	0	0
Bacteria(100);Firmicutes(100);unclassified;unclassified;unclassified;unclassified;unclassified;	JX640812	Uncultured bacterium clone HA3ER6P01BXMIB 16S ribosomal RNA gene, partial sequence	Firmicutes	H3QVG8203GYR6G	Otu247	4	0	4	0	0	0	0	0	0	0	0	0	0	0	0	0	0	0	0	0	0	0	2	0	0	0	0	1	0	0	1	0	0	0	0	0	0	0	0	0	0	0	0	0
Bacteria(100);Actinobacteria(100);Actinobacteria(100);Actinomycetales(100);Yaniellaceae(99);Yaniella(99);unclassified(99);	JQ729681	Yaniella sp. YUAB-SO-24 16S ribosomal RNA gene, partial sequence	Actinomycetales	H3QVG8203FNFJT	Otu248	135	0	124	0	6	2	3	0	0	0	0	0	0	0	0	0	0	0	0	0	0	0	6	2	0	2	29	7	10	3	28	0	24	13	0	0	1	0	0	0	1	0	0	0
Bacteria(100);Proteobacteria(100);Alphaproteobacteria(100);Rhizobiales(100);Hyphomicrobiaceae(94);Rhodoplanes(94);unclassified;	AB821161	Uncultured bacterium gene for 16S rRNA, partial sequence, clone: GJ16S2_D02	Alphaproteobacteria	H3QVG8203GTJS3	Otu249	1	0	1	0	0	0	0	0	0	0	0	0	0	0	0	0	0	0	0	0	0	0	1	0	0	0	0	0	0	0	0	0	0	0	0	0	0	0	0	0	0	0	0	0
Bacteria(100);Proteobacteria(100);Alphaproteobacteria(100);Rhizobiales(99);Bradyrhizobiaceae(98);Bosea(98);unclassified(98);	JX635498	Uncultured bacterium clone HA3ER6P01C8TOK 16S ribosomal RNA gene, partial sequence	Alphaproteobacteria	H3QVG8203GZT6J	Otu250	5	0	4	0	0	1	0	0	0	0	0	0	0	0	0	0	0	0	0	0	0	0	3	0	0	0	0	1	0	0	0	0	0	0	0	0	0	0	0	0	0	0	0	0
Bacteria(100);Thermi(100);Deinococci(100);Deinococcales(100);Deinococcaceae(100);Deinococcus(100);Deinococcus_papagonensis(98);	KF037396	Uncultured bacterium clone HL506 16S ribosomal RNA gene, partial sequence	other	H3QVG8203HB1RL	Otu251	1	0	1	0	0	0	0	0	0	0	0	0	0	0	0	0	0	0	0	0	0	0	1	0	0	0	0	0	0	0	0	0	0	0	0	0	0	0	0	0	0	0	0	0
Bacteria(100);Firmicutes(100);Bacilli(100);Bacillales(100);Planococcaceae(89);unclassified;unclassified;	EU723830	Bacillus anthracis strain HDDMM10 16S ribosomal RNA gene, partial sequence	Firmicutes	H3QVG8203F7CMO	Otu252	87	0	87	0	0	0	0	0	0	0	0	0	0	0	0	0	0	0	0	0	0	0	4	2	0	0	17	1	12	0	18	0	11	22	0	0	0	0	0	0	0	0	0	0
Bacteria(100);Proteobacteria(100);Gammaproteobacteria(100);Pseudomonadales(100);Moraxellaceae(100);Psychrobacter(100);unclassified;	KC734202	Bacterium 14W521 16S ribosomal RNA gene, partial sequence	Gammaproteobacteria	H3QVG8203GBWF7	Otu253	16	0	13	0	3	0	0	0	0	0	0	0	0	0	0	0	0	0	0	0	0	0	1	0	0	0	0	2	0	0	7	0	3	0	0	0	1	0	0	2	0	0	0	0
Bacteria(100);Proteobacteria(100);Alphaproteobacteria(100);Rhizobiales(96);unclassified;unclassified;unclassified;	KC904963	Rhizobium sp. YW14 16S ribosomal RNA gene, partial sequence	Alphaproteobacteria	H3QVG8203HERQ8	Otu254	19	0	10	0	7	0	2	0	0	0	0	0	0	0	0	0	0	0	0	0	0	0	2	0	0	0	2	3	2	0	1	0	0	0	0	6	1	0	0	0	0	0	0	0
Bacteria(100);Actinobacteria(100);Actinobacteria(100);Actinomycetales(100);unclassified;unclassified;unclassified;	.	.	Actinomycetales	H3QVG8203FN4C1	Otu255	1	0	1	0	0	0	0	0	0	0	0	0	0	0	0	0	0	0	0	0	0	0	1	0	0	0	0	0	0	0	0	0	0	0	0	0	0	0	0	0	0	0	0	0
Bacteria(100);Proteobacteria(100);Alphaproteobacteria(100);Sphingomonadales(100);unclassified;unclassified;unclassified;	KC764360	Uncultured bacterium clone SOPI073 16S ribosomal RNA gene, partial sequence	Alphaproteobacteria	H3QVG8203GV6NR	Otu256	57	0	35	0	13	2	7	0	0	0	0	0	0	0	0	0	0	0	0	0	0	0	2	0	0	8	9	5	0	7	3	1	0	0	0	2	0	0	0	4	1	0	0	4
Bacteria(100);Proteobacteria(100);Alphaproteobacteria(100);Rhizobiales(100);Aurantimonadaceae(98);unclassified(98);unclassified(98);	JX491426	Rhizobiales bacterium 14-01bPB 16S ribosomal RNA gene, partial sequence	Alphaproteobacteria	H3QVG8203FOU0K	Otu257	3	0	3	0	0	0	0	0	0	0	0	0	0	0	0	0	0	0	0	0	0	0	1	2	0	0	0	0	0	0	0	0	0	0	0	0	0	0	0	0	0	0	0	0
Bacteria(100);Bacteroidetes(100);Sphingobacteria(100);Sphingobacteriales(100);Chitinophagaceae(100);Flavisolibacter(100);unclassified(100);	KC453665	Uncultured Sphingobacterium sp. clone RLBp4269 16S ribosomal RNA gene, partial sequence	other	H3QVG8203FWEMT	Otu258	12	0	10	0	2	0	0	0	0	0	0	0	0	0	0	0	0	0	0	0	0	1	1	0	0	0	2	0	6	0	0	0	0	0	0	0	0	0	0	0	0	2	0	0
Bacteria(100);Bacteroidetes(100);Flavobacteria(100);Flavobacteriales(100);Flavobacteriaceae(99);Wautersiella(86);unclassified(86);	EU779437	Uncultured bacterium clone AFZEB_aaj72h08 16S ribosomal RNA gene, partial sequence	other	H3QVG8203GJ6E2	Otu259	1	0	1	0	0	0	0	0	0	0	0	0	0	0	0	0	0	0	0	0	0	0	1	0	0	0	0	0	0	0	0	0	0	0	0	0	0	0	0	0	0	0	0	0
Bacteria(100);Firmicutes(100);Bacilli(100);Bacillales(100);Planococcaceae(95);unclassified;unclassified;	JX631927	Uncultured bacterium clone G8XQE6O03G1CL9 16S ribosomal RNA gene, partial sequence	Firmicutes	H3QVG8203GABHY	Otu260	6	0	6	0	0	0	0	0	0	0	0	0	0	0	0	0	0	0	0	0	0	0	1	0	0	0	5	0	0	0	0	0	0	0	0	0	0	0	0	0	0	0	0	0
Bacteria(100);Proteobacteria(100);Alphaproteobacteria(100);unclassified;unclassified;unclassified;unclassified;	JX095836	Uncultured bacterium clone C2-82 16S ribosomal RNA gene, partial sequence	Alphaproteobacteria	H3QVG8203GMKTS	Otu261	2	0	1	0	1	0	0	0	0	0	0	0	0	0	0	0	0	0	0	0	0	0	1	0	0	0	0	0	0	0	0	0	0	0	0	0	0	0	0	0	0	0	0	0
Bacteria(100);Proteobacteria(100);Alphaproteobacteria(100);Sphingomonadales(100);unclassified;unclassified;unclassified;	KC624319	Uncultured bacterium clone T1S202A12 16S ribosomal RNA gene, partial sequence	Alphaproteobacteria	H3QVG8203GZXDN	Otu262	2	0	1	0	1	0	0	0	0	0	0	0	0	0	0	0	0	0	0	0	0	0	1	0	0	0	0	0	0	0	0	0	0	0	0	0	0	0	0	0	0	0	0	0
Bacteria(100);Bacteroidetes(100);Flavobacteria(82);Flavobacteriales(82);Flavobacteriaceae(82);unclassified;unclassified;	JF979273	Uncultured bacterium clone 1f12 16S ribosomal RNA gene, partial sequence	other	H3QVG8203G7UFU	Otu263	5	0	5	0	0	0	0	0	0	0	0	0	0	0	0	0	0	0	0	0	0	0	1	0	0	0	0	0	0	3	1	0	0	0	0	0	0	0	0	0	0	0	0	0
Bacteria(100);Bacteroidetes(100);Flavobacteria(100);Flavobacteriales(100);Flavobacteriaceae(100);Wautersiella(99);unclassified(99);	JX633297	Uncultured bacterium clone G8XQE6O04H6CHV 16S ribosomal RNA gene, partial sequence	other	H3QVG8203FVM0N	Otu264	1	0	1	0	0	0	0	0	0	0	0	0	0	0	0	0	0	0	0	0	0	0	1	0	0	0	0	0	0	0	0	0	0	0	0	0	0	0	0	0	0	0	0	0
Bacteria(100);Bacteroidetes(100);Sphingobacteria(100);Sphingobacteriales(100);Flexibacteraceae(92);Adhaeribacter(88);unclassified(88);	JQ400996	Uncultured Adhaeribacter sp. clone CNY_00944 16S ribosomal RNA gene, partial sequence	other	H3QVG8203GTT5W	Otu265	22	0	22	0	0	0	0	0	0	0	0	0	0	0	0	0	0	0	0	0	0	0	3	1	0	2	16	0	0	0	0	0	0	0	0	0	0	0	0	0	0	0	0	0
Bacteria(100);Proteobacteria(100);Alphaproteobacteria(95);Rhizobiales(91);unclassified;unclassified;unclassified;	KC534392	Devosia sp. VBW339 16S ribosomal RNA gene, partial sequence	Alphaproteobacteria	H3QVG8203HEHVY	Otu266	10	0	9	0	0	1	0	0	0	0	0	0	0	0	0	0	0	0	0	0	0	0	1	0	0	0	0	6	0	0	0	0	2	0	0	0	0	0	0	0	0	0	0	0
Bacteria(100);Proteobacteria(100);Alphaproteobacteria(100);Sphingomonadales(100);unclassified;unclassified;unclassified;	KC764198	Uncultured bacterium clone SCPI067 16S ribosomal RNA gene, partial sequence	Alphaproteobacteria	H3QVG8203GGE2Y	Otu267	13	0	11	0	2	0	0	0	0	0	0	0	0	0	0	0	0	0	0	0	0	0	2	0	0	1	4	0	2	0	0	0	2	0	0	0	0	0	0	0	0	0	0	2
Bacteria(100);Proteobacteria(100);Alphaproteobacteria(100);Rhodobacterales(100);Rhodobacteraceae(100);Paracoccus(93);unclassified;	HM717010	Uncultured bacterium clone GB7N87004IPURQ small subunit ribosomal RNA gene, partial sequence	Alphaproteobacteria	H3QVG8203G7EO5	Otu268	57	0	54	0	1	2	0	0	0	0	0	0	0	0	0	0	0	0	0	0	0	2	2	1	0	0	3	12	2	10	0	0	7	15	0	0	0	0	0	0	0	0	0	0
Bacteria(100);Proteobacteria(100);Alphaproteobacteria(100);Rhizobiales(99);unclassified;unclassified;unclassified;	HE962154	Rhodoplanes sp. JA527 partial 16S rRNA gene, strain JA527	Alphaproteobacteria	H3QVG8203FYPGC	Otu269	1	0	1	0	0	0	0	0	0	0	0	0	0	0	0	0	0	0	0	0	0	0	1	0	0	0	0	0	0	0	0	0	0	0	0	0	0	0	0	0	0	0	0	0
Bacteria(100);Actinobacteria(100);Actinobacteria(100);Actinomycetales(100);unclassified;unclassified;unclassified;	JX239764	Uncultured Gordonia sp. clone S10 16S ribosomal RNA gene, partial sequence	Actinomycetales	H3QVG8203FYRD3	Otu270	12	0	7	0	2	0	3	0	0	0	0	0	0	0	0	0	0	0	0	0	0	0	2	0	0	0	1	1	0	0	1	1	1	0	0	0	0	0	0	0	0	0	0	1
Bacteria(100);Bacteroidetes(100);Flavobacteria(92);Flavobacteriales(92);Flavobacteriaceae(80);unclassified;unclassified;	JX633930	Uncultured bacterium clone G8XQE6O04IEF5F 16S ribosomal RNA gene, partial sequence	other	H3QVG8203HGBQP	Otu271	1	0	1	0	0	0	0	0	0	0	0	0	0	0	0	0	0	0	0	0	0	0	1	0	0	0	0	0	0	0	0	0	0	0	0	0	0	0	0	0	0	0	0	0
Bacteria(100);Proteobacteria(100);Alphaproteobacteria(98);unclassified;unclassified;unclassified;unclassified;	JQ386693	Uncultured bacterium clone NT04c10_14698 16S ribosomal RNA gene, partial sequence	Alphaproteobacteria	H3QVG8203FOJMF	Otu272	1	0	1	0	0	0	0	0	0	0	0	0	0	0	0	0	0	0	0	0	0	0	1	0	0	0	0	0	0	0	0	0	0	0	0	0	0	0	0	0	0	0	0	0
Bacteria(100);Actinobacteria(100);Actinobacteria(100);Actinomycetales(100);Pseudonocardiaceae(94);unclassified;unclassified;	JX860378	Saccharothrix sp. FMA_239 16S ribosomal RNA gene, partial sequence	Actinomycetales	H3QVG8203GH6DT	Otu273	7	0	5	0	1	0	1	0	0	0	0	0	0	0	0	0	0	0	0	0	0	0	1	0	0	0	2	0	0	0	2	0	0	0	0	0	0	0	0	0	0	0	0	0
Bacteria(100);Actinobacteria(100);Actinobacteria(100);Acidimicrobiales(100);Iamiaceae(100);unclassified(97);unclassified(97);	KC554368	Uncultured bacterium clone 7-787 16S ribosomal RNA gene, partial sequence	other	H3QVG8203GWFAO	Otu274	22	0	22	0	0	0	0	0	0	0	0	0	0	0	0	0	0	0	0	0	0	0	2	1	0	0	4	0	0	0	0	0	1	14	0	0	0	0	0	0	0	0	0	0
Bacteria(100);Tenericutes(100);Mollicutes(100);Entomoplasmatales(100);Entomoplasmataceae(100);Mesoplasma(95);unclassified;	GAJY01002490	TSA: Megalurothrips sjostedti Megal_trimmed_contig_2517 transcribed RNA sequence	other	H3QVG8203GD7X6	Otu275	97	0	97	0	0	0	0	0	0	0	0	0	0	0	0	0	0	0	0	0	0	0	0	6	0	0	0	0	32	59	0	0	0	0	0	0	0	0	0	0	0	0	0	0
Bacteria(100);Proteobacteria(100);Gammaproteobacteria(100);unclassified;unclassified;unclassified;unclassified;	.	.	Gammaproteobacteria	H3QVG8203FPX2T	Otu276	8	0	8	0	0	0	0	0	0	0	0	0	0	0	0	0	0	0	0	0	0	0	0	8	0	0	0	0	0	0	0	0	0	0	0	0	0	0	0	0	0	0	0	0
Bacteria(100);Proteobacteria(100);Gammaproteobacteria(100);unclassified;unclassified;unclassified;unclassified;	FJ959829	Uncultured bacterium clone D8A8_183 16S ribosomal RNA gene, partial sequence	Gammaproteobacteria	H3QVG8203HH3YL	Otu277	4	0	4	0	0	0	0	0	0	0	0	0	0	0	0	0	0	0	0	0	0	0	0	4	0	0	0	0	0	0	0	0	0	0	0	0	0	0	0	0	0	0	0	0
Bacteria(100);Proteobacteria(100);Alphaproteobacteria(100);Caulobacterales(94);Caulobacteraceae(94);unclassified;unclassified;	KF032803	Bacterium LGM85 16S ribosomal RNA gene, partial sequence	Alphaproteobacteria	H3QVG8203G1H38	Otu278	14	0	13	0	1	0	0	0	0	0	0	0	0	0	0	0	0	0	0	0	0	0	0	3	0	0	0	7	0	0	0	0	3	0	0	0	0	1	0	0	0	0	0	0
Bacteria(100);Bacteroidetes(100);Flavobacteria(100);Flavobacteriales(100);Flavobacteriaceae(100);Capnocytophaga(99);unclassified;	KC866280	Capnocytophaga sputigena strain V1067808 16S ribosomal RNA gene, partial sequence	other	H3QVG8203GEZZ8	Otu279	5	0	5	0	0	0	0	0	0	0	0	0	0	0	0	0	0	0	0	0	0	0	0	5	0	0	0	0	0	0	0	0	0	0	0	0	0	0	0	0	0	0	0	0
Bacteria(100);Proteobacteria(100);Betaproteobacteria(99);Burkholderiales(99);unclassified;unclassified;unclassified;	KC607147	Uncultured bacterium clone CarbonSeq10b_030410_G04 16S ribosomal RNA gene, partial sequence	other	H3QVG8203GEO2G	Otu280	7	0	6	0	1	0	0	0	0	0	0	0	0	0	0	0	0	0	0	0	0	0	0	3	0	0	0	0	0	0	0	0	0	3	0	0	0	0	0	0	0	1	0	0
Bacteria(100);Firmicutes(100);Clostridia(99);Clostridiales(99);unclassified;unclassified;unclassified;	JX637182	Uncultured bacterium clone HA3ER6P01ASU02 16S ribosomal RNA gene, partial sequence	Firmicutes	H3QVG8203FW4EO	Otu281	3	0	3	0	0	0	0	0	0	0	0	0	0	0	0	0	0	0	0	0	0	0	0	3	0	0	0	0	0	0	0	0	0	0	0	0	0	0	0	0	0	0	0	0
Bacteria(100);Bacteroidetes(100);Flavobacteria(98);Flavobacteriales(98);Flavobacteriaceae(97);Myroides(80);unclassified;	KC734171	Bacterium 14W235 16S ribosomal RNA gene, partial sequence	other	H3QVG8203GKM6V	Otu282	4	0	4	0	0	0	0	0	0	0	0	0	0	0	0	0	0	0	0	0	0	0	0	2	0	0	0	0	2	0	0	0	0	0	0	0	0	0	0	0	0	0	0	0
Bacteria(100);Actinobacteria(100);Actinobacteria(100);Actinomycetales(100);Micrococcaceae(92);unclassified;unclassified;	NR_074690	Rothia mucilaginosa DY-18 strain DY-18 16S ribosomal RNA, complete sequence	Actinomycetales	H3QVG8203FM1G4	Otu283	3	0	3	0	0	0	0	0	0	0	0	0	0	0	0	0	0	0	0	0	0	0	0	2	0	0	0	0	0	0	0	0	1	0	0	0	0	0	0	0	0	0	0	0
Bacteria(100);Actinobacteria(100);Actinobacteria(100);Actinomycetales(100);Micrococcaceae(96);unclassified;unclassified;	KC470544	Kocuria sp. NII 1020 16S ribosomal RNA gene, partial sequence	Actinomycetales	H3QVG8203HDGRE	Otu284	5	0	5	0	0	0	0	0	0	0	0	0	0	0	0	0	0	0	0	0	0	0	0	5	0	0	0	0	0	0	0	0	0	0	0	0	0	0	0	0	0	0	0	0
Bacteria(100);Actinobacteria(100);Actinobacteria(100);Actinomycetales(100);unclassified;unclassified;unclassified;	EU289461	Uncultured bacterium clone 1-8G 16S ribosomal RNA gene, partial sequence	Actinomycetales	H3QVG8203G7MS2	Otu285	2	0	2	0	0	0	0	0	0	0	0	0	0	0	0	0	0	0	0	0	0	0	0	2	0	0	0	0	0	0	0	0	0	0	0	0	0	0	0	0	0	0	0	0
Bacteria(100);Chloroflexi(100);Bljii12(100);AKYG885(100);Dolo_23(100);unclassified(100);unclassified(100);	KC451009	Uncultured Clostridia bacterium clone RLBp4542 16S ribosomal RNA gene, partial sequence	other	H3QVG8203GBDAE	Otu286	2	0	2	0	0	0	0	0	0	0	0	0	0	0	0	0	0	0	0	0	0	0	0	2	0	0	0	0	0	0	0	0	0	0	0	0	0	0	0	0	0	0	0	0
Bacteria(100);Actinobacteria(100);Actinobacteria(100);Actinomycetales(100);Corynebacteriaceae(84);Corynebacterium(84);unclassified;	KC429600	Corynebacterium lipophiloflavum strain XFB-AW 16S ribosomal RNA gene, partial sequence	Actinomycetales	H3QVG8203F58YW	Otu287	7	0	7	0	0	0	0	0	0	0	0	0	0	0	0	0	0	0	0	0	0	0	0	4	0	0	0	0	2	1	0	0	0	0	0	0	0	0	0	0	0	0	0	0
Bacteria(100);Bacteroidetes(100);Flavobacteria(100);Flavobacteriales(100);Flavobacteriaceae(100);Capnocytophaga(100);Capnocytophaga_ochracea(98);	KC866161	Capnocytophaga sp. Melo48 16S ribosomal RNA gene, partial sequence	other	H3QVG8203FU30V	Otu288	3	0	3	0	0	0	0	0	0	0	0	0	0	0	0	0	0	0	0	0	0	0	0	3	0	0	0	0	0	0	0	0	0	0	0	0	0	0	0	0	0	0	0	0
Bacteria(100);Proteobacteria(100);Gammaproteobacteria(100);Pseudomonadales(99);Moraxellaceae(98);Acinetobacter(97);unclassified;	.	.	Gammaproteobacteria	H3QVG8203FOS72	Otu289	1	0	1	0	0	0	0	0	0	0	0	0	0	0	0	0	0	0	0	0	0	0	0	1	0	0	0	0	0	0	0	0	0	0	0	0	0	0	0	0	0	0	0	0
Bacteria(100);Firmicutes(100);Bacilli(100);Bacillales(100);Staphylococcaceae(100);Salinicoccus(93);unclassified(88);	GQ467517	Uncultured bacterium clone R4J3L4_H2 16S ribosomal RNA gene, partial sequence	Firmicutes	H3QVG8203GRSI4	Otu290	55	0	55	0	0	0	0	0	0	0	0	0	0	0	0	0	0	0	0	0	0	0	3	1	0	0	14	10	0	1	4	1	20	1	0	0	0	0	0	0	0	0	0	0
Bacteria(100);Bacteroidetes(100);Sphingobacteria(100);Sphingobacteriales(100);Chitinophagaceae(100);Sediminibacterium(99);unclassified(99);	JQ794634	Uncultured bacterium clone OTU-46 16S ribosomal RNA gene, partial sequence	other	H3QVG8203GICWP	Otu291	2	0	2	0	0	0	0	0	0	0	0	0	0	0	0	0	0	0	0	0	0	0	0	2	0	0	0	0	0	0	0	0	0	0	0	0	0	0	0	0	0	0	0	0
Bacteria(100);Actinobacteria(100);Actinobacteria(100);Actinomycetales(100);unclassified;unclassified;unclassified;	JF549623	Uncultured bacterium clone GDIC2IK01BHV2Q 16S ribosomal RNA gene, partial sequence	Actinomycetales	H3QVG8203HFKN3	Otu292	15	0	13	0	0	0	2	0	0	0	0	0	0	0	0	0	0	0	0	0	0	0	0	3	0	0	0	6	2	0	2	0	0	0	0	0	0	0	0	0	0	0	0	0
Bacteria(100);Proteobacteria(100);Alphaproteobacteria(99);Sphingomonadales(99);Sphingomonadaceae(99);unclassified;unclassified;	KC607424	Uncultured bacterium clone CarbonSeq10a_030410_G04 16S ribosomal RNA gene, partial sequence	Alphaproteobacteria	H3QVG8203HH7YE	Otu293	24	0	18	0	0	3	3	0	0	0	0	0	0	0	0	0	0	0	0	0	0	4	0	1	0	2	3	0	4	2	0	0	2	0	0	0	0	0	0	0	0	0	0	0
Bacteria(100);Proteobacteria(100);Alphaproteobacteria(100);Rhodobacterales(99);Rhodobacteraceae(99);Dinoroseobacter(84);unclassified(84);	JX041741	Uncultured alpha proteobacterium clone APC_2_D3 16S ribosomal RNA gene, partial sequence	Alphaproteobacteria	H3QVG8203F7BAT	Otu294	1	0	1	0	0	0	0	0	0	0	0	0	0	0	0	0	0	0	0	0	0	0	0	1	0	0	0	0	0	0	0	0	0	0	0	0	0	0	0	0	0	0	0	0
Bacteria(100);Proteobacteria(100);Alphaproteobacteria(100);Rhizobiales(100);unclassified;unclassified;unclassified;	KF037403	Uncultured bacterium clone HF514 16S ribosomal RNA gene, partial sequence	Alphaproteobacteria	H3QVG8203GV71G	Otu295	2	0	2	0	0	0	0	0	0	0	0	0	0	0	0	0	0	0	0	0	0	0	0	2	0	0	0	0	0	0	0	0	0	0	0	0	0	0	0	0	0	0	0	0
Bacteria(100);Firmicutes(100);Clostridia(100);Clostridiales(100);Clostridiales_Family_XI._Incertae_Sedis(100);Tissierella(100);unclassified(100);	KC845966	Uncultured bacterium clone DB41 16S ribosomal RNA gene, partial sequence	Firmicutes	H3QVG8203GB5O0	Otu296	4	0	4	0	0	0	0	0	0	0	0	0	0	0	0	0	0	0	0	0	0	0	0	4	0	0	0	0	0	0	0	0	0	0	0	0	0	0	0	0	0	0	0	0
Bacteria(100);Actinobacteria(100);Actinobacteria(100);Actinomycetales(100);Dermatophilaceae(99);unclassified(99);unclassified(99);	JF185536	Uncultured bacterium clone ncd2158b08c1 16S ribosomal RNA gene, partial sequence	Actinomycetales	H3QVG8203F87JF	Otu297	1	0	1	0	0	0	0	0	0	0	0	0	0	0	0	0	0	0	0	0	0	0	0	1	0	0	0	0	0	0	0	0	0	0	0	0	0	0	0	0	0	0	0	0
Bacteria(100);Chloroflexi(100);Bljii12(100);B07_WMSP1(100);FFCH4570(100);unclassified(100);unclassified(100);	JQ380860	Uncultured bacterium clone NCD3s1PowerKTS108921urunk00d1_13942 16S ribosomal RNA gene, partial sequence	other	H3QVG8203GOEPP	Otu298	1	0	1	0	0	0	0	0	0	0	0	0	0	0	0	0	0	0	0	0	0	0	0	1	0	0	0	0	0	0	0	0	0	0	0	0	0	0	0	0	0	0	0	0
Bacteria(100);Bacteroidetes(100);Flavobacteria(89);Flavobacteriales(89);unclassified;unclassified;unclassified;	AB239762	Uncultured bacterium gene for 16S rRNA, partial sequence, note: sequence type NZ-BA-8	other	H3QVG8203FXWQ6	Otu299	64	0	64	0	0	0	0	0	0	0	0	0	0	0	0	0	0	0	0	0	0	0	0	28	0	4	8	1	23	0	0	0	0	0	0	0	0	0	0	0	0	0	0	0
Bacteria(100);Firmicutes(100);Clostridia(100);Clostridiales(100);unclassified;unclassified;unclassified;	JX636380	Uncultured bacterium clone HA3ER6P01DVY0B 16S ribosomal RNA gene, partial sequence	Firmicutes	H3QVG8203G67HY	Otu300	4	0	4	0	0	0	0	0	0	0	0	0	0	0	0	0	0	0	0	0	0	0	0	1	0	0	0	0	0	0	0	0	0	3	0	0	0	0	0	0	0	0	0	0
Bacteria(100);Actinobacteria(100);Actinobacteria(100);Actinomycetales(100);unclassified;unclassified;unclassified;	KC554158	Uncultured bacterium clone 3-324 16S ribosomal RNA gene, partial sequence	Actinomycetales	H3QVG8203FPNS3	Otu301	2	0	1	0	1	0	0	0	0	0	0	0	0	0	0	0	0	0	0	0	0	0	0	1	0	0	0	0	0	0	0	0	0	0	0	0	1	0	0	0	0	0	0	0
Bacteria(100);Proteobacteria(100);Alphaproteobacteria(100);Sphingomonadales(100);Sphingomonadaceae(100);Sphingopyxis(100);unclassified(100);	KC873588	Uncultured bacterium clone S63_022 16S ribosomal RNA gene, partial sequence	Alphaproteobacteria	H3QVG8203GJICX	Otu302	1	0	1	0	0	0	0	0	0	0	0	0	0	0	0	0	0	0	0	0	0	0	0	1	0	0	0	0	0	0	0	0	0	0	0	0	0	0	0	0	0	0	0	0
Bacteria(100);Actinobacteria(100);Actinobacteria(100);Actinomycetales(100);Mycobacteriaceae(82);Mycobacterium(82);unclassified(80);	AB826001	Mycobacterium sp. SKDN-1 gene for 16S ribosomal RNA, partial sequence	Actinomycetales	H3QVG8203HKN6O	Otu303	23	0	12	0	11	0	0	0	0	0	0	0	0	0	0	0	0	0	0	0	0	0	0	1	0	1	0	5	1	0	2	0	2	0	0	0	0	0	0	0	0	0	0	3
Bacteria(100);Actinobacteria(100);Actinobacteria(100);Actinomycetales(100);unclassified;unclassified;unclassified;	KC554577	Uncultured bacterium clone 11-10 16S ribosomal RNA gene, partial sequence	Actinomycetales	H3QVG8203G1NS0	Otu304	1	0	1	0	0	0	0	0	0	0	0	0	0	0	0	0	0	0	0	0	0	0	0	1	0	0	0	0	0	0	0	0	0	0	0	0	0	0	0	0	0	0	0	0
Bacteria(100);Firmicutes(100);Bacilli(100);Lactobacillales(100);Leuconostocaceae(100);Leuconostoc(100);unclassified(93);	KF018066	Uncultured Leuconostoc sp. clone LE 16S ribosomal RNA gene, partial sequence	other	H3QVG8203HA45V	Otu305	15	0	13	0	0	2	0	0	0	0	0	0	0	0	0	0	0	0	0	0	0	0	0	2	0	8	3	0	0	0	0	0	0	0	0	0	0	0	0	0	0	0	0	0
Bacteria(100);Bacteroidetes(100);Sphingobacteria(100);Sphingobacteriales(100);Chitinophagaceae(97);unclassified;unclassified;	JF224310	Uncultured bacterium clone ncd2824e06c1 16S ribosomal RNA gene, partial sequence	other	H3QVG8203F6DOR	Otu306	20	0	19	0	1	0	0	0	0	0	0	0	0	0	0	0	0	0	0	0	0	0	0	0	0	6	0	0	0	0	0	0	0	13	0	0	0	0	0	0	0	0	0	0
Bacteria(100);Proteobacteria(100);Betaproteobacteria(100);Rhodocyclales(98);Rhodocyclaceae(98);Thauera(97);unclassified(97);	KC516507	Uncultured Thauera sp. clone MRS5-7 16S ribosomal RNA gene, partial sequence	other	H3QVG8203HID9O	Otu307	4	0	4	0	0	0	0	0	0	0	0	0	0	0	0	0	0	0	0	0	0	0	0	0	0	4	0	0	0	0	0	0	0	0	0	0	0	0	0	0	0	0	0	0
Bacteria(100);Proteobacteria(100);Alphaproteobacteria(100);Rhizobiales(100);Aurantimonadaceae(91);unclassified(91);unclassified(91);	KC764313	Uncultured bacterium clone SOPI034 16S ribosomal RNA gene, partial sequence	Alphaproteobacteria	H3QVG8203GSXG8	Otu308	21	0	21	0	0	0	0	0	0	0	0	0	0	0	0	0	0	0	0	0	0	0	0	0	0	3	9	1	0	7	0	0	1	0	0	0	0	0	0	0	0	0	0	0
Bacteria(100);Proteobacteria(100);Betaproteobacteria(100);Burkholderiales(100);Comamonadaceae(100);Acidovorax(91);unclassified(91);	KC873145	Uncultured bacterium clone S42_067 16S ribosomal RNA gene, partial sequence	other	H3QVG8203FNA2H	Otu309	60	0	51	0	9	0	0	0	0	0	0	0	0	0	0	0	0	0	0	0	0	1	2	0	0	14	0	4	12	1	3	0	4	10	0	0	0	0	0	5	0	0	0	1
Bacteria(100);Gemmatimonadetes(100);Gemmatimonadetes(100);Gemmatimonadales(100);Gemmatimonadaceae(100);unclassified(95);unclassified(95);	JQ370984	Uncultured bacterium clone WIR31Powerd10_19623 16S ribosomal RNA gene, partial sequence	other	H3QVG8203FQQ10	Otu310	2	0	2	0	0	0	0	0	0	0	0	0	0	0	0	0	0	0	0	0	0	0	0	0	0	2	0	0	0	0	0	0	0	0	0	0	0	0	0	0	0	0	0	0
Bacteria(100);Proteobacteria(100);Alphaproteobacteria(100);Rhizobiales(98);Methylocystaceae(95);unclassified(94);unclassified(94);	JX490041	Uncultured soil bacterium clone B160 16S ribosomal RNA gene, partial sequence	Alphaproteobacteria	H3QVG8203HF0N6	Otu311	2	0	2	0	0	0	0	0	0	0	0	0	0	0	0	0	0	0	0	0	0	0	0	0	0	2	0	0	0	0	0	0	0	0	0	0	0	0	0	0	0	0	0	0
Bacteria(100);Proteobacteria(100);Alphaproteobacteria(100);Sphingomonadales(100);Sphingomonadaceae(100);unclassified;unclassified;	KC252615	Sphingomonas sp. THG-DT81 16S ribosomal RNA gene, partial sequence	Alphaproteobacteria	H3QVG8203GK1HS	Otu312	10	0	7	0	0	3	0	0	0	0	0	0	0	0	0	0	0	0	0	0	0	0	0	0	0	2	3	0	0	2	0	0	0	0	0	0	0	0	0	0	0	0	0	0
Bacteria(100);Actinobacteria(100);Actinobacteria(100);Solirubrobacterales(100);unclassified;unclassified;unclassified;	JQ401838	Uncultured Rhizobiales bacterium clone CNY_02053 16S ribosomal RNA gene, partial sequence	other	H3QVG8203GJX8S	Otu313	2	0	2	0	0	0	0	0	0	0	0	0	0	0	0	0	0	0	0	0	0	0	0	0	0	2	0	0	0	0	0	0	0	0	0	0	0	0	0	0	0	0	0	0
Bacteria(100);Proteobacteria(100);Betaproteobacteria(99);Burkholderiales(90);Oxalobacteraceae(82);unclassified;unclassified;	AB507784	Uncultured beta proteobacterium gene for 16S ribosomal RNA, partial sequence, clone: comp2-52	other	H3QVG8203GP4BP	Otu314	1	0	1	0	0	0	0	0	0	0	0	0	0	0	0	0	0	0	0	0	0	0	0	0	0	1	0	0	0	0	0	0	0	0	0	0	0	0	0	0	0	0	0	0
Bacteria(100);Firmicutes(100);Bacilli(100);Lactobacillales(100);Lactobacillaceae(99);Lactobacillus(99);Lactobacillus_manihotivorans(89);	JN570407	Uncultured bacterium clone Plim_FZZ71GH08JG994 16S ribosomal RNA gene, partial sequence	Lactobacillus sp.	H3QVG8203GSKWY	Otu315	1	0	1	0	0	0	0	0	0	0	0	0	0	0	0	0	0	0	0	0	0	0	0	0	0	1	0	0	0	0	0	0	0	0	0	0	0	0	0	0	0	0	0	0
Bacteria(100);Proteobacteria(100);Alphaproteobacteria(100);Rhizobiales(100);Hyphomicrobiaceae(97);Hyphomicrobium(97);unclassified;	CP005587	Hyphomicrobium denitrificans 1NES1, complete genome	Alphaproteobacteria	H3QVG8203FWKLP	Otu316	3	0	3	0	0	0	0	0	0	0	0	0	0	0	0	0	0	0	0	0	0	0	0	0	0	2	1	0	0	0	0	0	0	0	0	0	0	0	0	0	0	0	0	0
Bacteria(100);Proteobacteria(100);Alphaproteobacteria(97);Rickettsiales(93);Mitochondria(93);Mitochondria_genus_incertae_sedis(93);unclassified;	GAHK01013517	TSA: Jatropha curcas Unigene969_JC-CK_1A transcribed RNA sequence	Alphaproteobacteria	H3QVG8203FK54H	Otu317	1	0	1	0	0	0	0	0	0	0	0	0	0	0	0	0	0	0	0	0	0	0	0	0	0	1	0	0	0	0	0	0	0	0	0	0	0	0	0	0	0	0	0	0
Bacteria(100);Firmicutes(100);Clostridia(98);Clostridiales(98);unclassified;unclassified;unclassified;	HM438655	Uncultured bacterium clone D2CKBa1 16S ribosomal RNA gene, partial sequence	Firmicutes	H3QVG8203FXINO	Otu318	3	0	3	0	0	0	0	0	0	0	0	0	0	0	0	0	0	0	0	0	0	0	0	0	0	1	0	0	0	2	0	0	0	0	0	0	0	0	0	0	0	0	0	0
Bacteria(100);Actinobacteria(100);Actinobacteria(100);Actinomycetales(100);unclassified;unclassified;unclassified;	FN667021	Uncultured compost bacterium partial 16S rRNA gene, clone PS92	Actinomycetales	H3QVG8203G4NKS	Otu319	1	0	1	0	0	0	0	0	0	0	0	0	0	0	0	0	0	0	0	0	0	0	0	0	0	1	0	0	0	0	0	0	0	0	0	0	0	0	0	0	0	0	0	0
Bacteria(100);Actinobacteria(100);Actinobacteria(100);Actinomycetales(100);Actinomycetaceae(82);unclassified;unclassified;	JQ259256	Actinomyces sp. 'ARUP UnID 60' 16S ribosomal RNA gene, partial sequence	Actinomycetales	H3QVG8203GE388	Otu320	1	0	1	0	0	0	0	0	0	0	0	0	0	0	0	0	0	0	0	0	0	0	0	0	0	1	0	0	0	0	0	0	0	0	0	0	0	0	0	0	0	0	0	0
Bacteria(100);Firmicutes(100);Bacilli(100);Bacillales(100);unclassified;unclassified;unclassified;	JX543939	Uncultured bacterium clone SeqID410 16S ribosomal RNA gene, partial sequence	Firmicutes	H3QVG8203F1PE7	Otu321	82	0	74	0	1	7	0	0	0	0	0	0	0	0	0	0	0	0	0	0	0	0	0	0	0	2	1	68	0	0	0	0	0	3	0	0	0	0	0	0	0	0	0	0
Bacteria(100);Proteobacteria(100);Betaproteobacteria(97);unclassified;unclassified;unclassified;unclassified;	KC972203	Uncultured bacterium clone BSNS1610 16S ribosomal RNA gene, partial sequence	other	H3QVG8203FX3UQ	Otu322	1	0	1	0	0	0	0	0	0	0	0	0	0	0	0	0	0	0	0	0	0	0	0	0	0	1	0	0	0	0	0	0	0	0	0	0	0	0	0	0	0	0	0	0
Bacteria(100);Proteobacteria(100);Betaproteobacteria(100);unclassified;unclassified;unclassified;unclassified;	KC606205	Uncultured bacterium clone CSbiofilm_2_040210_G09 16S ribosomal RNA gene, partial sequence	other	H3QVG8203GL5SN	Otu323	3	0	1	0	0	0	2	0	0	0	0	0	0	0	0	0	0	0	0	0	0	0	0	0	0	1	0	0	0	0	0	0	0	0	0	0	0	0	0	0	0	0	0	0
Bacteria(100);Proteobacteria(100);Gammaproteobacteria(100);Xanthomonadales(99);Xanthomonadaceae(99);unclassified;unclassified;	KC749338	Uncultured bacterium clone AMD-G63 16S ribosomal RNA gene, partial sequence	Gammaproteobacteria	H3QVG8203FPHXX	Otu324	1	0	1	0	0	0	0	0	0	0	0	0	0	0	0	0	0	0	0	0	0	0	0	0	0	1	0	0	0	0	0	0	0	0	0	0	0	0	0	0	0	0	0	0
Bacteria(100);Actinobacteria(100);Actinobacteria(100);Actinomycetales(100);Nocardioidaceae(94);Aeromicrobium(93);unclassified;	EU834249	Aeromicrobium kwangyangensis strain DS23 16S ribosomal RNA gene, partial sequence	Actinomycetales	H3QVG8203HKTDB	Otu325	1	0	1	0	0	0	0	0	0	0	0	0	0	0	0	0	0	0	0	0	0	0	0	0	0	1	0	0	0	0	0	0	0	0	0	0	0	0	0	0	0	0	0	0
Bacteria(100);Bacteroidetes(100);Flavobacteria(100);Flavobacteriales(100);Flavobacteriaceae(100);Flavobacterium(93);unclassified;	JQ375645	Uncultured bacterium clone NT61d9_21307 16S ribosomal RNA gene, partial sequence	other	H3QVG8203G028R	Otu326	1	0	1	0	0	0	0	0	0	0	0	0	0	0	0	0	0	0	0	0	0	0	0	0	0	1	0	0	0	0	0	0	0	0	0	0	0	0	0	0	0	0	0	0
Bacteria(100);Actinobacteria(100);Actinobacteria(100);Bifidobacteriales(100);Bifidobacteriaceae(100);Bifidobacterium(97);unclassified;	KC880055	Bifidobacterium sp. PB24 16S ribosomal RNA gene, partial sequence	other	H3QVG8203HEBM6	Otu327	1	0	1	0	0	0	0	0	0	0	0	0	0	0	0	0	0	0	0	0	0	0	0	0	0	1	0	0	0	0	0	0	0	0	0	0	0	0	0	0	0	0	0	0
Bacteria(100);Proteobacteria(100);Betaproteobacteria(100);unclassified;unclassified;unclassified;unclassified;	KC788632	Janthinobacterium sp. VITPRS26 16S ribosomal RNA gene, partial sequence	other	H3QVG8203F8ZLY	Otu328	155	0	139	0	16	0	0	0	0	0	0	0	0	0	0	0	0	0	0	0	0	0	2	0	0	4	68	25	8	8	10	4	10	0	0	3	1	0	0	0	1	0	0	3
Bacteria(100);Actinobacteria(100);Actinobacteria(100);Solirubrobacterales(100);unclassified;unclassified;unclassified;	JF176759	Uncultured bacterium clone ncd2050b05c2 16S ribosomal RNA gene, partial sequence	other	H3QVG8203GBV1R	Otu329	7	0	7	0	0	0	0	0	0	0	0	0	0	0	0	0	0	0	0	0	0	0	0	0	0	0	7	0	0	0	0	0	0	0	0	0	0	0	0	0	0	0	0	0
Bacteria(100);Actinobacteria(100);Actinobacteria(100);Actinomycetales(100);Nocardioidaceae(100);Aeromicrobium(100);unclassified(100);	KC554524	Uncultured bacterium clone 10-734 16S ribosomal RNA gene, partial sequence	Actinomycetales	H3QVG8203GHVH4	Otu330	9	0	9	0	0	0	0	0	0	0	0	0	0	0	0	0	0	0	0	0	0	0	1	0	0	0	7	1	0	0	0	0	0	0	0	0	0	0	0	0	0	0	0	0
Bacteria(100);Firmicutes(100);Bacilli(100);Lactobacillales(100);Aerococcaceae(100);Facklamia(89);unclassified(89);	JX640242	Uncultured bacterium clone HA3ER6P01DM5NS 16S ribosomal RNA gene	other	H3QVG8203F3PUH	Otu331	64	0	64	0	0	0	0	0	0	0	0	0	0	0	0	0	0	0	0	0	0	0	0	0	0	0	13	46	0	0	0	0	5	0	0	0	0	0	0	0	0	0	0	0
Bacteria(100);Bacteroidetes(100);Bacteroidia(99);Bacteroidales(99);Rikenellaceae(99);Alistipes(99);unclassified(99);	NR_102861	Alistipes shahii WAL 8301 strain WAL 8301 16S ribosomal RNA, complete sequence	other	H3QVG8203G9E2F	Otu332	16	0	16	0	0	0	0	0	0	0	0	0	0	0	0	0	0	0	0	0	0	0	0	0	0	0	10	5	0	0	0	0	1	0	0	0	0	0	0	0	0	0	0	0
Bacteria(100);Proteobacteria(100);Betaproteobacteria(100);Neisseriales(86);Neisseriaceae(86);unclassified;unclassified;	KC866295	Neisseria zoodegmatis strain V0545133 16S ribosomal RNA gene, partial sequence	other	H3QVG8203FRIUU	Otu333	11	0	11	0	0	0	0	0	0	0	0	0	0	0	0	0	0	0	0	0	0	0	0	4	0	0	6	0	0	0	0	1	0	0	0	0	0	0	0	0	0	0	0	0
Bacteria(100);Actinobacteria(100);Actinobacteria(100);Actinomycetales(100);Pseudonocardiaceae(98);Saccharopolyspora(96);unclassified(96);	KF017569	Saccharopolyspora sp. ICN16 16S ribosomal RNA gene, partial sequence	Actinomycetales	H3QVG8203G6II1	Otu334	28	0	28	0	0	0	0	0	0	0	0	0	0	0	0	0	0	0	0	0	0	0	0	1	0	0	21	5	0	0	0	0	1	0	0	0	0	0	0	0	0	0	0	0
Bacteria(100);Firmicutes(100);Bacilli(88);Bacillales(87);unclassified;unclassified;unclassified;	JX636404	Uncultured bacterium clone HBYTM9301BFLVJ 16S ribosomal RNA gene, partial sequence	Firmicutes	H3QVG8203GJMHF	Otu335	16	0	14	0	2	0	0	0	0	0	0	0	0	0	0	0	0	0	0	0	0	0	0	0	0	0	13	0	0	0	0	0	1	0	0	0	0	0	0	0	0	0	0	0
Bacteria(100);Actinobacteria(100);Actinobacteria(100);Acidimicrobiales(100);Acidimicrobiaceae(89);Ilumatobacter(88);unclassified;	JN547117	Uncultured bacterium clone NABC25IV031 16S ribosomal RNA gene, partial sequence	other	H3QVG8203GOZMT	Otu336	6	0	6	0	0	0	0	0	0	0	0	0	0	0	0	0	0	0	0	0	0	0	0	0	0	0	6	0	0	0	0	0	0	0	0	0	0	0	0	0	0	0	0	0
Bacteria(100);Firmicutes(100);Clostridia(95);Clostridiales(95);Clostridiaceae(89);unclassified;unclassified;	JX636699	Uncultured bacterium clone HA3ER6P01EMID3 16S ribosomal RNA gene, partial sequence	Firmicutes	H3QVG8203GXBN6	Otu337	23	0	23	0	0	0	0	0	0	0	0	0	0	0	0	0	0	0	0	0	0	0	0	0	0	0	11	1	2	0	3	0	6	0	0	0	0	0	0	0	0	0	0	0
Bacteria(100);Bacteroidetes(100);Sphingobacteria(100);Sphingobacteriales(100);Chitinophagaceae(98);Flavisolibacter(98);unclassified(98);	JQ371785	Uncultured bacterium clone NT04e10_21549 16S ribosomal RNA gene, partial sequence	other	H3QVG8203HBLD1	Otu338	22	0	20	0	1	0	1	0	0	0	0	0	0	0	0	0	0	0	0	0	0	0	2	0	0	0	10	0	3	4	0	0	1	0	0	0	0	0	0	0	0	0	0	0
Bacteria(100);Actinobacteria(100);Actinobacteria(100);Actinomycetales(100);unclassified;unclassified;unclassified;	KF032771	Bacterium LGM53 16S ribosomal RNA gene, partial sequence	Actinomycetales	H3QVG8203GREPB	Otu339	6	0	6	0	0	0	0	0	0	0	0	0	0	0	0	0	0	0	0	0	0	0	1	0	0	0	5	0	0	0	0	0	0	0	0	0	0	0	0	0	0	0	0	0
Bacteria(100);Actinobacteria(100);Actinobacteria(100);Actinomycetales(100);Bogoriellaceae(97);Georgenia(97);unclassified(97);	FJ672173	Uncultured bacterium clone Ll142-3E5 16S ribosomal RNA gene, partial sequence	Actinomycetales	H3QVG8203F5F7N	Otu340	11	0	11	0	0	0	0	0	0	0	0	0	0	0	0	0	0	0	0	0	0	0	0	0	0	0	7	1	0	0	0	0	0	3	0	0	0	0	0	0	0	0	0	0
Bacteria(100);Bacteroidetes(100);Bacteroidia(100);Bacteroidales(100);Rikenellaceae(100);Alistipes(100);unclassified(98);	JX095661	Uncultured bacterium clone Hdb2-87 16S ribosomal RNA gene, partial sequence	other	H3QVG8203HLYNZ	Otu341	6	0	6	0	0	0	0	0	0	0	0	0	0	0	0	0	0	0	0	0	0	0	0	0	0	0	6	0	0	0	0	0	0	0	0	0	0	0	0	0	0	0	0	0
Bacteria(100);Actinobacteria(100);Actinobacteria(100);Actinomycetales(100);Pseudonocardiaceae(94);unclassified;unclassified;	KC856802	Pseudonocardia sp. WMMB 256 16S ribosomal RNA gene, partial sequence	Actinomycetales	H3QVG8203FT3XJ	Otu342	14	0	14	0	0	0	0	0	0	0	0	0	0	0	0	0	0	0	0	0	0	0	0	1	0	0	5	6	0	0	1	1	0	0	0	0	0	0	0	0	0	0	0	0
Bacteria(100);Proteobacteria(100);Betaproteobacteria(100);Burkholderiales(95);unclassified;unclassified;unclassified;	KC006116	Uncultured Alcaligenaceae bacterium clone D3N58 16S ribosomal RNA gene, partial sequence	other	H3QVG8203F0P1R	Otu343	4	0	4	0	0	0	0	0	0	0	0	0	0	0	0	0	0	0	0	0	0	0	0	0	0	0	4	0	0	0	0	0	0	0	0	0	0	0	0	0	0	0	0	0
Bacteria(100);Actinobacteria(100);Actinobacteria(100);Actinomycetales(100);unclassified;unclassified;unclassified;	KC879690	Brevibacterium sp. CCZU12-1 16S ribosomal RNA gene, partial sequence	Actinomycetales	H3QVG8203GZFOP	Otu344	5	0	5	0	0	0	0	0	0	0	0	0	0	0	0	0	0	0	0	0	0	0	0	0	0	0	5	0	0	0	0	0	0	0	0	0	0	0	0	0	0	0	0	0
Bacteria(100);Firmicutes(100);Bacilli(100);Bacillales(100);unclassified;unclassified;unclassified;	KF021804	Bacillus sp. H-124 16S ribosomal RNA gene, partial sequence	Firmicutes	H3QVG8203HHXNL	Otu345	10	0	10	0	0	0	0	0	0	0	0	0	0	0	0	0	0	0	0	0	0	0	0	0	0	0	8	2	0	0	0	0	0	0	0	0	0	0	0	0	0	0	0	0
Bacteria(100);Firmicutes(100);Clostridia(100);Clostridiales(100);Lachnospiraceae(100);Ruminococcus(90);unclassified(89);	KC856690	Uncultured bacterium clone LUCCWR1904bE02008 16S ribosomal RNA gene, partial sequence	Firmicutes	H3QVG8203GIO3X	Otu346	24	0	24	0	0	0	0	0	0	0	0	0	0	0	0	0	0	0	0	0	0	0	2	0	0	0	5	16	0	0	0	0	1	0	0	0	0	0	0	0	0	0	0	0
Bacteria(100);Actinobacteria(100);Actinobacteria(100);Actinomycetales(100);Micromonosporaceae(99);unclassified;unclassified;	JQ378945	Uncultured bacterium clone NT30h5_20370 16S ribosomal RNA gene, partial sequence	Actinomycetales	H3QVG8203FNXW6	Otu347	5	0	5	0	0	0	0	0	0	0	0	0	0	0	0	0	0	0	0	0	0	0	0	0	0	0	5	0	0	0	0	0	0	0	0	0	0	0	0	0	0	0	0	0
Bacteria(100);Actinobacteria(100);Actinobacteria(100);Actinomycetales(100);unclassified;unclassified;unclassified;	KC554703	Uncultured bacterium clone 11-829 16S ribosomal RNA gene, partial sequence	Actinomycetales	H3QVG8203GKX6M	Otu348	8	0	8	0	0	0	0	0	0	0	0	0	0	0	0	0	0	0	0	0	0	0	0	0	0	0	7	0	0	0	0	0	1	0	0	0	0	0	0	0	0	0	0	0
Bacteria(100);Firmicutes(100);Clostridia(100);Clostridiales(100);Ruminococcaceae(94);unclassified;unclassified;	JX638559	Uncultured bacterium clone HBYTM9302HH04I 16S ribosomal RNA gene, partial sequence	Firmicutes	H3QVG8203GVSX6	Otu349	9	0	9	0	0	0	0	0	0	0	0	0	0	0	0	0	0	0	0	0	0	0	0	0	0	0	9	0	0	0	0	0	0	0	0	0	0	0	0	0	0	0	0	0
Bacteria(100);Actinobacteria(100);Actinobacteria(100);Actinomycetales(100);Micrococcaceae(89);unclassified;unclassified;	KC447515	Uncultured actinobacterium clone RLBp1234 16S ribosomal RNA gene, partial sequence	Actinomycetales	H3QVG8203HI80O	Otu350	33	0	31	0	1	0	1	0	0	0	0	0	0	0	0	0	0	0	0	0	0	0	0	0	0	0	17	1	1	1	1	2	5	2	1	1	0	0	0	0	0	0	0	0
Bacteria(100);Firmicutes(100);Bacilli(100);Lactobacillales(100);Streptococcaceae(100);Streptococcus(100);unclassified(95);	NR_102811	Streptococcus pasteurianus ATCC 43144 strain ATCC 43144 16S ribosomal RNA, complete sequence	other	H3QVG8203G351R	Otu351	23	0	22	0	0	0	1	0	0	0	0	0	0	0	0	0	0	0	0	0	0	0	0	0	0	0	13	0	0	2	0	0	7	0	0	0	0	0	0	0	0	0	0	0
Bacteria(100);Cyanobacteria(100);4C0d-2(100);YS2(100);unclassified(100);unclassified(100);unclassified(100);	JX633674	Uncultured bacterium clone G8XQE6O04I7OB3 16S ribosomal RNA gene, partial sequence	other	H3QVG8203GDIPC	Otu352	7	0	7	0	0	0	0	0	0	0	0	0	0	0	0	0	0	0	0	0	0	0	0	0	0	0	7	0	0	0	0	0	0	0	0	0	0	0	0	0	0	0	0	0
Bacteria(100);Actinobacteria(100);Actinobacteria(100);Actinomycetales(100);Nocardioidaceae(98);unclassified;unclassified;	JQ378088	Uncultured bacterium clone NT42b6_20449 16S ribosomal RNA gene, partial sequence	Actinomycetales	H3QVG8203HDJ6I	Otu353	21	0	21	0	0	0	0	0	0	0	0	0	0	0	0	0	0	0	0	0	0	0	0	0	0	0	17	0	0	2	2	0	0	0	0	0	0	0	0	0	0	0	0	0
Bacteria(100);Firmicutes(100);Bacilli(100);Bacillales(100);Planococcaceae(99);Solibacillus(90);unclassified(90);	HE610416	Uncultured bacterium partial 16S rRNA gene, clone meg2	Firmicutes	H3QVG8203FMHFC	Otu354	4	0	4	0	0	0	0	0	0	0	0	0	0	0	0	0	0	0	0	0	0	0	0	0	0	0	4	0	0	0	0	0	0	0	0	0	0	0	0	0	0	0	0	0
Bacteria(100);Proteobacteria(100);Alphaproteobacteria(100);Rhodospirillales(100);Acetobacteraceae(100);Roseomonas(98);unclassified(97);	.	.	Acetobacteraceae	H3QVG8203GYO2C	Otu355	4	0	4	0	0	0	0	0	0	0	0	0	0	0	0	0	0	0	0	0	0	0	0	0	0	0	4	0	0	0	0	0	0	0	0	0	0	0	0	0	0	0	0	0
Bacteria(100);Actinobacteria(100);Actinobacteria(100);Actinomycetales(100);unclassified;unclassified;unclassified;	KC879690	Brevibacterium sp. CCZU12-1 16S ribosomal RNA gene, partial sequence	Actinomycetales	H3QVG8203FRX4F	Otu356	3	0	3	0	0	0	0	0	0	0	0	0	0	0	0	0	0	0	0	0	0	0	0	0	0	0	3	0	0	0	0	0	0	0	0	0	0	0	0	0	0	0	0	0
Bacteria(100);Proteobacteria(100);Alphaproteobacteria(100);Rhodobacterales(99);Rhodobacteraceae(99);Paracoccus(94);unclassified;	JX573230	Uncultured bacterium clone 21Cs 16S ribosomal RNA gene, partial sequence	Alphaproteobacteria	H3QVG8203GI5YD	Otu357	13	0	12	0	1	0	0	0	0	0	0	0	0	0	0	0	0	0	0	0	0	2	0	0	0	1	3	0	0	0	0	0	6	0	0	0	0	0	0	0	1	0	0	0
Bacteria(100);Proteobacteria(100);Betaproteobacteria(100);Burkholderiales(100);Alcaligenaceae(90);Sutterella(90);unclassified(90);	JX639778	Uncultured bacterium clone HBYTM9302FQF4H 16S ribosomal RNA gene, partial sequence	other	H3QVG8203GX6RS	Otu358	4	0	4	0	0	0	0	0	0	0	0	0	0	0	0	0	0	0	0	0	0	0	0	0	0	0	4	0	0	0	0	0	0	0	0	0	0	0	0	0	0	0	0	0
Bacteria(100);Proteobacteria(100);Alphaproteobacteria(100);Caulobacterales(96);Caulobacteraceae(96);Phenylobacterium(95);unclassified(95);	KC928402	Uncultured Phenylobacterium sp. clone SY5Y1 16S ribosomal RNA gene, partial sequence	Alphaproteobacteria	H3QVG8203F9RVE	Otu359	4	0	4	0	0	0	0	0	0	0	0	0	0	0	0	0	0	0	0	0	0	0	0	0	0	0	4	0	0	0	0	0	0	0	0	0	0	0	0	0	0	0	0	0
Bacteria(100);Actinobacteria(100);Actinobacteria(100);Actinomycetales(100);Pseudonocardiaceae(88);unclassified;unclassified;	HQ877432	Saccharomonospora sp. AML899 16S ribosomal RNA gene, partial sequence	Actinomycetales	H3QVG8203GTDEG	Otu360	5	0	5	0	0	0	0	0	0	0	0	0	0	0	0	0	0	0	0	0	0	0	0	0	0	0	4	1	0	0	0	0	0	0	0	0	0	0	0	0	0	0	0	0
Bacteria(100);Proteobacteria(100);Gammaproteobacteria(100);Xanthomonadales(100);Xanthomonadaceae(100);Lysobacter(89);unclassified(89);	JN801137	Uncultured bacterium clone GL29101i10 16S ribosomal RNA gene, partial sequence	Gammaproteobacteria	H3QVG8203GJLW2	Otu361	20	0	20	0	0	0	0	0	0	0	0	0	0	0	0	0	0	0	0	0	0	0	2	0	0	0	4	9	0	0	1	0	4	0	0	0	0	0	0	0	0	0	0	0
Bacteria(100);Proteobacteria(100);Gammaproteobacteria(100);Xanthomonadales(99);Xanthomonadaceae(99);Lysobacter(86);unclassified(86);	JQ426296	Uncultured bacterium clone AN0C1CE09 16S ribosomal RNA gene, partial sequence	Gammaproteobacteria	H3QVG8203HHAA6	Otu362	8	0	7	0	1	0	0	0	0	0	0	0	0	0	0	0	0	0	0	0	0	0	0	0	0	0	5	1	0	0	0	0	0	1	0	0	0	0	0	0	0	0	0	0
Bacteria(100);Proteobacteria(100);unclassified;unclassified;unclassified;unclassified;unclassified;	JQ372531	Uncultured bacterium clone WIR21Fastb11_8804 16S ribosomal RNA gene, partial sequence	other	H3QVG8203FVTOQ	Otu363	5	0	4	0	1	0	0	0	0	0	0	0	0	0	0	0	0	0	0	0	0	0	0	0	0	0	4	0	0	0	0	0	0	0	0	0	0	0	0	0	0	0	0	0
Bacteria(100);Firmicutes(100);Bacilli(100);Lactobacillales(100);Carnobacteriaceae(100);unclassified(98);unclassified(98);	JX640214	Uncultured bacterium clone HA3ER6P01AMDUC 16S ribosomal RNA gene, partial sequence	other	H3QVG8203GA21S	Otu364	26	0	24	0	2	0	0	0	0	0	0	0	0	0	0	0	0	0	0	0	0	0	1	0	0	0	10	3	0	1	4	0	5	0	0	0	0	0	0	0	0	0	0	2
Bacteria(100);Bacteroidetes(100);Sphingobacteria(100);Sphingobacteriales(100);Flexibacteraceae(85);Pontibacter(85);unclassified(81);	HM730684	Uncultured bacterium clone GB7N87004JAF1E small subunit ribosomal RNA gene, partial sequence	other	H3QVG8203GWNL3	Otu365	4	0	4	0	0	0	0	0	0	0	0	0	0	0	0	0	0	0	0	0	0	0	0	0	0	0	4	0	0	0	0	0	0	0	0	0	0	0	0	0	0	0	0	0
Bacteria(100);Actinobacteria(100);Actinobacteria(100);Actinomycetales(100);unclassified;unclassified;unclassified;	KF021897	Micrococcus sp. H-247 16S ribosomal RNA gene, partial sequence	Actinomycetales	H3QVG8203GQ7JQ	Otu366	3	0	3	0	0	0	0	0	0	0	0	0	0	0	0	0	0	0	0	0	0	0	0	0	0	0	3	0	0	0	0	0	0	0	0	0	0	0	0	0	0	0	0	0
Bacteria(100);Actinobacteria(100);Actinobacteria(100);Actinomycetales(100);Geodermatophilaceae(100);Geodermatophilus(89);unclassified;	JQ377205	Uncultured bacterium clone NT51f4_19722 16S ribosomal RNA gene, partial sequence	Actinomycetales	H3QVG8203GKM6S	Otu367	5	0	5	0	0	0	0	0	0	0	0	0	0	0	0	0	0	0	0	0	0	0	0	0	0	0	5	0	0	0	0	0	0	0	0	0	0	0	0	0	0	0	0	0
Bacteria(100);Firmicutes(100);Clostridia(100);Clostridiales(100);Clostridiales_Family_XI._Incertae_Sedis(99);Finegoldia(96);unclassified;	KF007163	Finegoldia sp. S9 AA1-5 16S ribosomal RNA gene, partial sequence	Firmicutes	H3QVG8203GCWCO	Otu368	33	0	8	0	0	25	0	0	0	0	0	0	0	0	0	0	0	0	0	0	0	0	0	0	0	0	6	0	0	0	0	0	2	0	0	0	0	0	0	0	0	0	0	0
Bacteria(100);Proteobacteria(100);Alphaproteobacteria(100);Rhodobacterales(94);Rhodobacteraceae(94);unclassified;unclassified;	JQ071626	Uncultured Paracoccus sp. clone LL194 16S ribosomal RNA gene, partial sequence	Alphaproteobacteria	H3QVG8203HHNZI	Otu369	10	0	10	0	0	0	0	0	0	0	0	0	0	0	0	0	0	0	0	0	0	0	0	0	0	0	8	0	0	0	0	0	2	0	0	0	0	0	0	0	0	0	0	0
Bacteria(100);Bacteroidetes(100);Sphingobacteria(98);Sphingobacteriales(98);Chitinophagaceae(98);unclassified;unclassified;	KC442491	Uncultured Bacteroidetes bacterium clone 1H6 16S ribosomal RNA gene, partial sequence	other	H3QVG8203GWRO5	Otu370	7	0	7	0	0	0	0	0	0	0	0	0	0	0	0	0	0	0	0	0	0	0	0	2	0	0	5	0	0	0	0	0	0	0	0	0	0	0	0	0	0	0	0	0
Bacteria(100);Tenericutes(100);Mollicutes(100);Anaeroplasmatales(100);Anaeroplasmataceae(100);Anaeroplasma(100);unclassified(100);	JX106892	Uncultured bacterium clone MID47_35286 16S ribosomal RNA gene, partial sequence	other	H3QVG8203GHN7P	Otu371	3	0	3	0	0	0	0	0	0	0	0	0	0	0	0	0	0	0	0	0	0	0	0	0	0	0	3	0	0	0	0	0	0	0	0	0	0	0	0	0	0	0	0	0
Bacteria(100);Bacteroidetes(100);Bacteroidia(100);Bacteroidales(100);Bacteroidaceae(100);Bacteroides(100);unclassified;	JX640235	Uncultured bacterium clone HA3ER6P01CMMT0 16S ribosomal RNA gene, partial sequence	other	H3QVG8203GMDH8	Otu372	4	0	4	0	0	0	0	0	0	0	0	0	0	0	0	0	0	0	0	0	0	0	0	0	0	0	4	0	0	0	0	0	0	0	0	0	0	0	0	0	0	0	0	0
Bacteria(100);Proteobacteria(100);Deltaproteobacteria(99);Bdellovibrionales(99);Bdellovibrionaceae(99);Bdellovibrio(99);unclassified(99);	HQ120104	Uncultured bacterium isolate 1112934648831 16S ribosomal RNA gene, partial sequence	other	H3QVG8203FK8NT	Otu373	2	0	2	0	0	0	0	0	0	0	0	0	0	0	0	0	0	0	0	0	0	0	0	0	0	0	2	0	0	0	0	0	0	0	0	0	0	0	0	0	0	0	0	0
Bacteria(100);Bacteroidetes(100);Bacteroidia(100);Bacteroidales(100);Prevotellaceae(100);Prevotella(100);Prevotella_copri(100);	JX640091	Uncultured bacterium clone HBYTM9302F1VGD 16S ribosomal RNA gene, partial sequence	other	H3QVG8203F9LB9	Otu374	16	0	16	0	0	0	0	0	0	0	0	0	0	0	0	0	0	0	0	0	0	0	3	0	0	0	8	0	0	0	0	0	5	0	0	0	0	0	0	0	0	0	0	0
Bacteria(100);Firmicutes(100);Clostridia(100);Clostridiales(100);Clostridiales_Family_XI._Incertae_Sedis(81);Anaerococcus(81);unclassified;	JX640922	Uncultured bacterium clone HBYTM9301BUEHQ 16S ribosomal RNA gene, partial sequence	Firmicutes	H3QVG8203GMZG5	Otu375	3	0	3	0	0	0	0	0	0	0	0	0	0	0	0	0	0	0	0	0	0	0	0	0	0	0	3	0	0	0	0	0	0	0	0	0	0	0	0	0	0	0	0	0
Bacteria(100);Proteobacteria(100);Alphaproteobacteria(96);Sphingomonadales(96);Sphingomonadaceae(96);unclassified;unclassified;	KF037293	Uncultured bacterium clone HF724 16S ribosomal RNA gene, partial sequence	Alphaproteobacteria	H3QVG8203GPG57	Otu376	7	0	6	0	0	0	1	0	0	0	0	0	0	0	0	0	0	0	0	0	0	0	0	0	0	0	6	0	0	0	0	0	0	0	0	0	0	0	0	0	0	0	0	0
Bacteria(100);Firmicutes(100);Clostridia(98);Clostridiales(98);Lachnospiraceae(96);unclassified;unclassified;	JX640510	Uncultured bacterium clone HBYTM9302G5HLU 16S ribosomal RNA gene, partial sequence	Firmicutes	H3QVG8203FUON8	Otu377	9	0	9	0	0	0	0	0	0	0	0	0	0	0	0	0	0	0	0	0	0	0	1	0	0	0	5	0	2	0	0	0	1	0	0	0	0	0	0	0	0	0	0	0
Bacteria(100);Firmicutes(100);Clostridia(100);Clostridiales(100);Lachnospiraceae(100);unclassified;unclassified;	JX632083	Uncultured bacterium clone G8XQE6O03G79FB 16S ribosomal RNA gene, partial sequence	Firmicutes	H3QVG8203F9N7H	Otu378	11	0	11	0	0	0	0	0	0	0	0	0	0	0	0	0	0	0	0	0	0	0	0	0	0	0	3	7	0	0	1	0	0	0	0	0	0	0	0	0	0	0	0	0
Bacteria(100);Proteobacteria(100);Gammaproteobacteria(100);Alteromonadales(100);Idiomarinaceae(100);unclassified(99);unclassified(99);	KC705319	Idiomarina sp. HL78 16S ribosomal RNA gene, partial sequence	Gammaproteobacteria	H3QVG8203FZKGT	Otu379	4	0	4	0	0	0	0	0	0	0	0	0	0	0	0	0	0	0	0	0	0	0	0	0	0	0	2	0	0	0	2	0	0	0	0	0	0	0	0	0	0	0	0	0
Bacteria(100);Actinobacteria(100);Actinobacteria(100);Actinomycetales(100);unclassified;unclassified;unclassified;	KC789733	Williamsia sp. PL112 16S ribosomal RNA gene, partial sequence	Actinomycetales	H3QVG8203FYYFC	Otu380	11	0	8	0	3	0	0	0	0	0	0	0	0	0	0	0	0	0	0	0	0	0	0	0	0	0	8	0	0	0	0	0	0	0	0	2	0	0	0	0	0	0	0	1
Bacteria(100);Proteobacteria(100);Gammaproteobacteria(100);Pseudomonadales(99);Pseudomonadaceae(99);Pseudomonas(97);unclassified(86);	KF052079	Pseudomonas aeruginosa strain BOQ12 16S ribosomal RNA gene, partial sequence	Gammaproteobacteria	H3QVG8203GV9JI	Otu381	32	0	31	0	1	0	0	0	0	0	0	0	0	0	0	0	0	0	0	0	0	0	0	1	0	0	9	5	16	0	0	0	0	0	0	0	0	1	0	0	0	0	0	0
Bacteria(100);Firmicutes(100);Bacilli(100);Bacillales(100);Planococcaceae(100);Sporosarcina(96);unclassified(96);	KC160934	Sporosarcina sp. SS16.7 16S ribosomal RNA gene, partial sequence	Firmicutes	H3QVG8203FRZ5O	Otu382	7	1	4	0	2	0	0	0	0	0	0	0	1	0	0	0	0	0	0	0	0	0	0	1	0	0	3	0	0	0	0	0	0	0	0	0	0	0	0	0	0	0	0	2
Bacteria(100);Bacteroidetes(100);Flavobacteria(99);Flavobacteriales(99);Flavobacteriaceae(99);unclassified;unclassified;	AB736209	Uncultured Flavobacteriaceae bacterium gene for 16S rRNA, partial sequence, clone: 9i110	other	H3QVG8203HGU15	Otu383	2	0	2	0	0	0	0	0	0	0	0	0	0	0	0	0	0	0	0	0	0	0	0	0	0	0	2	0	0	0	0	0	0	0	0	0	0	0	0	0	0	0	0	0
Bacteria(100);Actinobacteria(100);Actinobacteria(100);Actinomycetales(100);unclassified;unclassified;unclassified;	KC702837	Arthrobacter sp. NG14 16S ribosomal RNA gene, partial sequence	Actinomycetales	H3QVG8203G2A3C	Otu384	18	0	18	0	0	0	0	0	0	0	0	0	0	0	0	0	0	0	0	0	0	0	0	0	0	0	2	0	16	0	0	0	0	0	0	0	0	0	0	0	0	0	0	0
Bacteria(100);Actinobacteria(100);Actinobacteria(100);Actinomycetales(100);unclassified;unclassified;unclassified;	HF912775	Nocardioides sp. Gbf-Lam-13 partial 16S rRNA gene, isolate Gbf-Lam-13	Actinomycetales	H3QVG8203GKTB3	Otu385	11	0	9	0	2	0	0	0	0	0	0	0	0	0	0	0	0	0	0	0	0	0	0	0	0	0	5	0	0	0	0	0	0	4	0	0	0	0	0	0	0	0	0	0
Bacteria(100);Proteobacteria(100);Alphaproteobacteria(100);Rhizobiales(100);Rhizobiaceae(82);unclassified;unclassified;	HE965926	Uncultured bacterium partial 16S rRNA gene, clone WT14L24	Alphaproteobacteria	H3QVG8203F9SDS	Otu386	5	0	5	0	0	0	0	0	0	0	0	0	0	0	0	0	0	0	0	0	0	0	0	0	0	0	5	0	0	0	0	0	0	0	0	0	0	0	0	0	0	0	0	0
Bacteria(100);Proteobacteria(100);Alphaproteobacteria(98);Sphingomonadales(95);Sphingomonadaceae(94);unclassified;unclassified;	KC216772	Uncultured Sphingomonadaceae bacterium clone PBW-197 16S ribosomal RNA gene, partial sequence	Alphaproteobacteria	H3QVG8203GBMBZ	Otu387	4	0	4	0	0	0	0	0	0	0	0	0	0	0	0	0	0	0	0	0	0	0	0	0	0	0	4	0	0	0	0	0	0	0	0	0	0	0	0	0	0	0	0	0
Bacteria(100);Acidobacteria(100);Acidobacteria_Gp6(99);Acidobacteria_Gp6_order_incertae_sedis(99);Acidobacteria_Gp6_family_incertae_sedis(99);Gp6(99);unclassified;	JQ910754	Uncultured bacterium clone S6_16S_38 16S ribosomal RNA gene, partial sequence	other	H3QVG8203GNV2H	Otu388	14	0	11	0	2	0	1	0	0	0	0	0	0	0	0	0	0	0	0	0	0	0	0	0	0	0	3	0	0	0	0	2	1	5	0	0	0	0	0	0	0	1	0	1
Bacteria(100);Actinobacteria(100);Actinobacteria(100);Rubrobacterales(99);Rubrobacteraceae(99);Rubrobacter(99);unclassified(94);	JQ400478	Uncultured Rubrobacter sp. clone CNY_00340 16S ribosomal RNA gene, partial sequence	other	H3QVG8203HG6VD	Otu389	4	0	4	0	0	0	0	0	0	0	0	0	0	0	0	0	0	0	0	0	0	0	0	0	0	0	4	0	0	0	0	0	0	0	0	0	0	0	0	0	0	0	0	0
Bacteria(100);Bacteroidetes(100);Bacteroidia(86);Bacteroidales(86);unclassified;unclassified;unclassified;	JX637812	Uncultured bacterium clone HBYTM9301A3SW9 16S ribosomal RNA gene, partial sequence	other	H3QVG8203G5S64	Otu390	10	0	10	0	0	0	0	0	0	0	0	0	0	0	0	0	0	0	0	0	0	0	0	0	0	0	5	0	1	0	0	0	4	0	0	0	0	0	0	0	0	0	0	0
Bacteria(100);Proteobacteria(100);Alphaproteobacteria(100);Caulobacterales(100);Caulobacteraceae(100);Phenylobacterium(99);unclassified(99);	KC607380	Uncultured bacterium clone bacflank_0693 16S ribosomal RNA gene, partial sequence	Alphaproteobacteria	H3QVG8203GW62V	Otu391	14	0	13	0	0	0	1	0	0	0	0	0	0	0	0	0	0	0	0	0	0	0	0	0	0	0	5	1	2	4	1	0	0	0	0	0	0	0	0	0	0	0	0	0
Bacteria(100);Proteobacteria(100);Alphaproteobacteria(100);Rhodobacterales(98);Rhodobacteraceae(97);unclassified;unclassified;	AB681114	Paracoccus kocurii gene for 16S rRNA, partial sequence, strain: NBRC 16713	Alphaproteobacteria	H3QVG8203G4XZS	Otu392	11	0	9	0	1	0	1	0	0	0	0	0	0	0	0	0	0	0	0	0	0	0	0	0	0	0	8	0	0	0	1	0	0	0	0	0	0	0	0	0	0	0	0	0
Bacteria(100);Bacteroidetes(100);Bacteroidia(92);Bacteroidales(92);RikenellaceaeII(92);unclassified(92);unclassified(92);	JX638958	Uncultured bacterium clone HBYTM9302I1UKT 16S ribosomal RNA gene, partial sequence	other	H3QVG8203GBPWB	Otu393	3	0	3	0	0	0	0	0	0	0	0	0	0	0	0	0	0	0	0	0	0	0	0	0	0	0	3	0	0	0	0	0	0	0	0	0	0	0	0	0	0	0	0	0
Bacteria(100);Proteobacteria(100);Alphaproteobacteria(100);Rhodobacterales(100);Rhodobacteraceae(100);unclassified;unclassified;	JQ977217	Paracoccus sp. Bcb10 16S ribosomal RNA gene, partial sequence	Alphaproteobacteria	H3QVG8203FU4R5	Otu394	11	0	9	0	0	0	2	0	0	0	0	0	0	0	0	0	0	0	0	0	0	0	0	0	0	0	8	0	0	0	0	0	1	0	0	0	0	0	0	0	0	0	0	0
Bacteria(100);Bacteroidetes(100);Bacteroidia(99);Bacteroidales(99);Marinilabiaceae(99);unclassified(99);unclassified(99);	JX391337	Uncultured bacterium clone HS001 16S ribosomal RNA gene, partial sequence	other	H3QVG8203GVT1M	Otu395	6	0	6	0	0	0	0	0	0	0	0	0	0	0	0	0	0	0	0	0	0	0	0	0	0	0	3	0	0	0	0	0	3	0	0	0	0	0	0	0	0	0	0	0
Bacteria(100);Proteobacteria(100);Gammaproteobacteria(99);unclassified;unclassified;unclassified;unclassified;	JQ401188	Uncultured Chloroflexi bacterium clone CNY_01186 16S ribosomal RNA gene, partial sequence	Gammaproteobacteria	H3QVG8203F9TNA	Otu396	8	0	8	0	0	0	0	0	0	0	0	0	0	0	0	0	0	0	0	0	0	0	0	0	0	0	5	1	0	0	0	0	2	0	0	0	0	0	0	0	0	0	0	0
Bacteria(100);Bacteroidetes(100);Sphingobacteria(100);Sphingobacteriales(100);Chitinophagaceae(100);Flavisolibacter(98);unclassified(98);	JX839707	Uncultured bacterium clone CDBPa1 16S ribosomal RNA gene, partial sequence	other	H3QVG8203GQ2L5	Otu397	4	0	2	0	2	0	0	0	0	0	0	0	0	0	0	0	0	0	0	0	0	0	0	0	0	0	2	0	0	0	0	0	0	0	0	0	0	0	0	0	0	0	0	2
Bacteria(100);Bacteroidetes(100);Sphingobacteria(81);Sphingobacteriales(81);unclassified;unclassified;unclassified;	JQ400993	Uncultured Adhaeribacter sp. clone CNY_00941 16S ribosomal RNA gene, partial sequence	other	H3QVG8203G09RV	Otu398	4	0	4	0	0	0	0	0	0	0	0	0	0	0	0	0	0	0	0	0	0	0	0	0	0	0	4	0	0	0	0	0	0	0	0	0	0	0	0	0	0	0	0	0
Bacteria(100);Gemmatimonadetes(100);Gemmatimonadetes(100);Gemmatimonadales(100);Gemmatimonadaceae(100);Gemmatimonas(95);unclassified(95);	KC321830	Uncultured bacterium clone SAB2_144 16S ribosomal RNA gene, partial sequence	other	H3QVG8203FMBXX	Otu399	1	0	1	0	0	0	0	0	0	0	0	0	0	0	0	0	0	0	0	0	0	0	0	0	0	0	1	0	0	0	0	0	0	0	0	0	0	0	0	0	0	0	0	0
Bacteria(100);Chloroflexi(100);Thermomicrobia(100);Sphaerobacterales(100);Sphaerobacterineae(100);HN1-15(100);unclassified(100);	JQ978845	Uncultured bacterium clone A-61 16S ribosomal RNA gene, partial sequence	other	H3QVG8203FSW6V	Otu400	5	0	5	0	0	0	0	0	0	0	0	0	0	0	0	0	0	0	0	0	0	0	0	0	0	1	2	0	2	0	0	0	0	0	0	0	0	0	0	0	0	0	0	0
Bacteria(100);Actinobacteria(100);Actinobacteria(100);Actinomycetales(100);Geodermatophilaceae(100);Geodermatophilus(91);unclassified(82);	KC554987	Uncultured bacterium clone K1-362. 16S ribosomal RNA gene, partial sequence	Actinomycetales	H3QVG8203GT8GE	Otu401	87	0	66	0	8	4	9	0	0	0	0	0	0	0	0	0	0	0	0	0	0	2	0	0	0	0	35	1	2	11	5	0	5	5	0	0	3	0	0	0	1	1	0	3
Bacteria(100);Bacteroidetes(100);Bacteroidia(99);Bacteroidales(99);Rikenellaceae(98);Alistipes(98);unclassified;	GU609930	Uncultured bacterium clone DF1753 16S ribosomal RNA gene, partial sequence	other	H3QVG8203FXV9G	Otu402	1	0	1	0	0	0	0	0	0	0	0	0	0	0	0	0	0	0	0	0	0	0	0	0	0	0	1	0	0	0	0	0	0	0	0	0	0	0	0	0	0	0	0	0
Bacteria(100);Actinobacteria(100);Actinobacteria(100);Actinomycetales(100);Nocardioidaceae(98);unclassified(98);unclassified(98);	JQ378182	Uncultured bacterium clone NT42e11_20467 16S ribosomal RNA gene, partial sequence	Actinomycetales	H3QVG8203HC7YA	Otu403	3	0	2	0	1	0	0	0	0	0	0	0	0	0	0	0	0	0	0	0	0	0	0	0	0	0	2	0	0	0	0	0	0	0	0	0	0	0	0	0	0	0	0	0
Bacteria(100);Proteobacteria(100);Gammaproteobacteria(100);Enterobacteriales(99);Enterobacteriaceae(99);unclassified;unclassified;	KC734353	Bacterium W52 16S ribosomal RNA gene, partial sequence	Enterobacteriaceae	H3QVG8203FW797	Otu404	2	1	1	0	0	0	0	0	0	0	0	0	0	0	0	0	1	0	0	0	0	0	0	0	0	0	1	0	0	0	0	0	0	0	0	0	0	0	0	0	0	0	0	0
Bacteria(100);Proteobacteria(100);Alphaproteobacteria(92);Rhizobiales(89);Methylocystaceae(82);unclassified(80);unclassified(80);	KC448998	Uncultured alpha proteobacterium clone RLBp4352 16S ribosomal RNA gene, partial sequence	Alphaproteobacteria	H3QVG8203G5GLY	Otu405	2	0	2	0	0	0	0	0	0	0	0	0	0	0	0	0	0	0	0	0	0	0	0	0	0	0	2	0	0	0	0	0	0	0	0	0	0	0	0	0	0	0	0	0
Bacteria(100);Actinobacteria(100);Actinobacteria(100);Actinomycetales(100);Micrococcaceae(98);Kocuria(95);Kocuria_rosea(88);	KC492511	Kocuria sp. BS10 16S ribosomal RNA gene, partial sequence	Actinomycetales	H3QVG8203GSV6S	Otu406	57	0	48	0	4	1	4	0	0	0	0	0	0	0	0	0	0	0	0	0	0	2	1	1	0	0	31	1	0	1	4	0	6	1	0	0	0	0	0	0	1	0	0	2
Bacteria(100);Firmicutes(100);Bacilli(100);Bacillales(100);Staphylococcaceae(97);Salinicoccus(92);unclassified(83);	JX634700	Uncultured bacterium clone G8XQE6O04J0UZS 16S ribosomal RNA gene, partial sequence	Firmicutes	H3QVG8203GYWHU	Otu407	1	0	1	0	0	0	0	0	0	0	0	0	0	0	0	0	0	0	0	0	0	0	0	0	0	0	1	0	0	0	0	0	0	0	0	0	0	0	0	0	0	0	0	0
Bacteria(100);Proteobacteria(100);Gammaproteobacteria(100);Legionellales(100);Legionellaceae(100);Legionella(100);unclassified;	KC620607	Uncultured bacterium clone AMD-A25 16S ribosomal RNA gene, partial sequence	Gammaproteobacteria	H3QVG8203HAA21	Otu408	2	0	2	0	0	0	0	0	0	0	0	0	0	0	0	0	0	0	0	0	0	0	0	0	0	0	2	0	0	0	0	0	0	0	0	0	0	0	0	0	0	0	0	0
Bacteria(100);Bacteroidetes(100);Sphingobacteria(100);Sphingobacteriales(100);Chitinophagaceae(99);unclassified(83);unclassified(83);	JQ793573	Uncultured Bacteroidetes bacterium clone SGR260 16S ribosomal RNA gene, partial sequence	other	H3QVG8203FN1PL	Otu409	9	0	9	0	0	0	0	0	0	0	0	0	0	0	0	0	0	0	0	0	0	0	0	0	0	3	6	0	0	0	0	0	0	0	0	0	0	0	0	0	0	0	0	0
Bacteria(100);Bacteroidetes(100);Sphingobacteria(100);Sphingobacteriales(100);Flexibacteraceae(95);Pontibacter(94);Pontibacter_korlensis(92);	JQ978833	Uncultured bacterium clone A-48 16S ribosomal RNA gene, partial sequence	other	H3QVG8203HC0TM	Otu410	14	0	13	0	1	0	0	0	0	0	0	0	0	0	0	0	0	0	0	0	0	0	2	0	0	0	3	0	0	0	0	0	0	8	0	0	0	0	0	0	1	0	0	0
Bacteria(100);Actinobacteria(100);Actinobacteria(100);Actinomycetales(100);Streptomycetaceae(98);Streptomyces(96);unclassified(88);	KC848663	Streptomyces purpurascens strain NGA28 16S ribosomal RNA gene, partial sequence	Actinomycetales	H3QVG8203GU62B	Otu411	9	0	4	0	5	0	0	0	0	0	0	0	0	0	0	0	0	0	0	0	0	0	0	0	0	0	3	1	0	0	0	0	0	0	0	0	0	0	0	0	0	0	0	0
Bacteria(100);Bacteroidetes(100);Sphingobacteria(97);Sphingobacteriales(97);Chitinophagaceae(95);unclassified(94);unclassified(94);	GU624517	Uncultured bacterium clone PF6622 16S ribosomal RNA gene, partial sequence	other	H3QVG8203GUVGI	Otu412	3	0	3	0	0	0	0	0	0	0	0	0	0	0	0	0	0	0	0	0	0	0	0	0	0	0	3	0	0	0	0	0	0	0	0	0	0	0	0	0	0	0	0	0
Bacteria(100);Firmicutes(100);Bacilli(100);Bacillales(100);unclassified;unclassified;unclassified;	KF021812	Bhargavaea sp. H-132 16S ribosomal RNA gene, partial sequence	Firmicutes	H3QVG8203G39KW	Otu413	15	0	15	0	0	0	0	0	0	0	0	0	0	0	0	0	0	0	0	0	0	0	0	0	0	0	3	9	0	0	0	0	2	0	1	0	0	0	0	0	0	0	0	0
Bacteria(100);Actinobacteria(100);Actinobacteria(100);Actinomycetales(100);unclassified;unclassified;unclassified;	NR_025261	Nocardioides aquiterrae strain GW-9 16S ribosomal RNA, partial sequence	Actinomycetales	H3QVG8203G4CQQ	Otu414	5	0	5	0	0	0	0	0	0	0	0	0	0	0	0	0	0	0	0	0	0	0	0	0	0	0	1	0	0	0	0	0	0	4	0	0	0	0	0	0	0	0	0	0
Bacteria(100);Actinobacteria(100);Actinobacteria(100);Actinomycetales(100);unclassified;unclassified;unclassified;	KF150504	Microbacterium oxydans strain JN270 16S ribosomal RNA gene, partial sequence	Actinomycetales	H3QVG8203GWWSN	Otu415	2	0	2	0	0	0	0	0	0	0	0	0	0	0	0	0	0	0	0	0	0	0	0	0	0	0	2	0	0	0	0	0	0	0	0	0	0	0	0	0	0	0	0	0
Bacteria(100);Firmicutes(100);Bacilli(100);Lactobacillales(100);Enterococcaceae(92);unclassified;unclassified;	JX887422	Uncultured bacterium clone CH12 16S ribosomal RNA gene, partial sequence	other	H3QVG8203FT2X4	Otu416	3	0	3	0	0	0	0	0	0	0	0	0	0	0	0	0	0	0	0	0	0	0	0	0	0	0	3	0	0	0	0	0	0	0	0	0	0	0	0	0	0	0	0	0
Bacteria(100);Proteobacteria(100);Gammaproteobacteria(100);Pasteurellales(96);Pasteurellaceae(96);Mannheimia(91);unclassified(91);	NR_102832	Mannheimia haemolytica USDA-ARS-USMARC-183 strain USDA-ARS-USMARC-183 16S ribosomal RNA, complete sequence	Gammaproteobacteria	H3QVG8203FVPZ3	Otu417	2	0	2	0	0	0	0	0	0	0	0	0	0	0	0	0	0	0	0	0	0	0	0	0	0	0	2	0	0	0	0	0	0	0	0	0	0	0	0	0	0	0	0	0
Bacteria(100);Proteobacteria(100);Alphaproteobacteria(100);Rhizobiales(100);Methylobacteriaceae(99);Methylobacterium(99);Methylobacterium_radiotolerans(92);	KC702828	Methylobacterium sp. NG05 16S ribosomal RNA gene, partial sequence	Alphaproteobacteria	H3QVG8203FXDA4	Otu418	10	0	4	0	5	0	1	0	0	0	0	0	0	0	0	0	0	0	0	0	0	0	1	0	0	0	1	0	0	0	1	0	0	1	0	0	0	0	0	0	0	0	0	5
Bacteria(100);Actinobacteria(100);Actinobacteria(100);Actinomycetales(100);unclassified;unclassified;unclassified;	KC764363	Uncultured bacterium clone SOPI086 16S ribosomal RNA gene, partial sequence	Actinomycetales	H3QVG8203G6Q6L	Otu419	12	0	12	0	0	0	0	0	0	0	0	0	0	0	0	0	0	0	0	0	0	0	0	0	0	0	3	0	0	0	0	0	5	4	0	0	0	0	0	0	0	0	0	0
Bacteria(100);Actinobacteria(100);Actinobacteria(100);Actinomycetales(98);unclassified;unclassified;unclassified;	JN172653	Uncultured soil bacterium clone eb_ebs116 16S ribosomal RNA gene, partial sequence	Actinomycetales	H3QVG8203G6S2Y	Otu420	2	0	2	0	0	0	0	0	0	0	0	0	0	0	0	0	0	0	0	0	0	0	0	0	0	0	2	0	0	0	0	0	0	0	0	0	0	0	0	0	0	0	0	0
Bacteria(100);Bacteroidetes(100);Sphingobacteria(98);Sphingobacteriales(98);Cytophagaceae(89);Arcicella(84);unclassified;	KC516543	Uncultured Arcicella sp. clone MRS5-43 16S ribosomal RNA gene, partial sequence	other	H3QVG8203GOW5R	Otu421	3	0	1	0	2	0	0	0	0	0	0	0	0	0	0	0	0	0	0	0	0	0	0	0	0	0	1	0	0	0	0	0	0	0	0	0	0	0	0	0	0	0	0	0
Bacteria(100);Firmicutes(100);Clostridia(100);Clostridiales(100);Lachnospiraceae(100);unclassified;unclassified;	AB612843	Uncultured rumen bacterium gene for 16S rRNA, partial sequence, clone: D-C-CA59	Firmicutes	H3QVG8203F4G2M	Otu422	2	0	2	0	0	0	0	0	0	0	0	0	0	0	0	0	0	0	0	0	0	0	0	0	0	0	2	0	0	0	0	0	0	0	0	0	0	0	0	0	0	0	0	0
Bacteria(100);Bacteroidetes(100);Sphingobacteria(99);Sphingobacteriales(99);Sphingobacteriaceae(99);Sphingobacterium(98);unclassified(96);	JF731241	Sphingobacterium composti Ten et al. 2007 strain M-SX103 16S ribosomal RNA gene, partial sequence	other	H3QVG8203F0PBF	Otu423	1	0	1	0	0	0	0	0	0	0	0	0	0	0	0	0	0	0	0	0	0	0	0	0	0	0	1	0	0	0	0	0	0	0	0	0	0	0	0	0	0	0	0	0
Bacteria(100);Actinobacteria(100);Actinobacteria(100);Actinomycetales(100);Microbacteriaceae(93);unclassified;unclassified;	KC986995	Salinibacterium sp. TP-Snow-C65 16S ribosomal RNA gene, partial sequence	Actinomycetales	H3QVG8203G1UOR	Otu424	3	0	2	0	1	0	0	0	0	0	0	0	0	0	0	0	0	0	0	0	0	0	0	0	0	0	2	0	0	0	0	0	0	0	0	0	0	1	0	0	0	0	0	0
Bacteria(100);Proteobacteria(100);Alphaproteobacteria(100);Rhizobiales(97);Aurantimonadaceae(95);unclassified(95);unclassified(95);	JF972711	Uncultured bacterium isolate DGGE gel band C3-1 16S ribosomal RNA gene, partial sequence	Alphaproteobacteria	H3QVG8203G9L5S	Otu425	4	0	3	0	0	0	1	0	0	0	0	0	0	0	0	0	0	0	0	0	0	0	0	0	0	0	1	1	0	0	1	0	0	0	0	0	0	0	0	0	0	0	0	0
Bacteria(100);Actinobacteria(100);Actinobacteria(100);Actinomycetales(100);Mycobacteriaceae(86);Mycobacterium(86);unclassified(86);	KC554479	Uncultured bacterium clone 9-870 16S ribosomal RNA gene, partial sequence	Actinomycetales	H3QVG8203HAAJF	Otu426	1	0	1	0	0	0	0	0	0	0	0	0	0	0	0	0	0	0	0	0	0	0	0	0	0	0	1	0	0	0	0	0	0	0	0	0	0	0	0	0	0	0	0	0
Bacteria(100);Actinobacteria(100);Actinobacteria(100);Actinomycetales(100);Microbacteriaceae(95);Agrococcus(93);Agrococcus_jenensis(93);	KF032795	Bacterium LGM77 16S ribosomal RNA gene, partial sequence	Actinomycetales	H3QVG8203GBFB9	Otu427	6	0	2	0	2	0	2	0	0	0	0	0	0	0	0	0	0	0	0	0	0	0	0	0	0	0	1	0	0	0	0	0	1	0	0	0	0	0	0	0	0	0	0	0
Bacteria(100);Bacteroidetes(100);Sphingobacteria(100);Sphingobacteriales(100);Chitinophagaceae(100);unclassified;unclassified;	HM486301	Uncultured Chitinophagaceae bacterium clone Jab PL2W2G6 16S ribosomal RNA gene, partial sequence	other	H3QVG8203GEOZN	Otu428	3	0	2	0	1	0	0	0	0	0	0	0	0	0	0	0	0	0	0	0	0	0	0	0	0	0	2	0	0	0	0	0	0	0	0	0	0	0	0	1	0	0	0	0
Bacteria(100);Proteobacteria(100);Gammaproteobacteria(100);Pseudomonadales(96);Moraxellaceae(96);Alkanindiges(96);unclassified(96);	JX196290	Uncultured bacterium clone IMCUGW13B59 16S ribosomal RNA gene, partial sequence	Gammaproteobacteria	H3QVG8203GLNBT	Otu429	3	0	3	0	0	0	0	0	0	0	0	0	0	0	0	0	0	0	0	0	0	0	0	0	0	0	3	0	0	0	0	0	0	0	0	0	0	0	0	0	0	0	0	0
Bacteria(100);Bacteroidetes(100);Sphingobacteria(89);Sphingobacteriales(89);unclassified;unclassified;unclassified;	KC606567	Uncultured bacterium clone CSbiofilm_14_040210_D06 16S ribosomal RNA gene, partial sequence	other	H3QVG8203GA3EH	Otu430	2	0	2	0	0	0	0	0	0	0	0	0	0	0	0	0	0	0	0	0	0	0	0	0	0	0	1	1	0	0	0	0	0	0	0	0	0	0	0	0	0	0	0	0
Bacteria(100);Actinobacteria(100);Actinobacteria(100);Actinomycetales(100);Pseudonocardiaceae(98);Thermocrispum(93);unclassified;	AB562480	Thermocrispum municipale gene for 16S rRNA, partial sequence, strain: 0916-(2)-4-50-5-1-1	Actinomycetales	H3QVG8203F8MBE	Otu431	1	0	1	0	0	0	0	0	0	0	0	0	0	0	0	0	0	0	0	0	0	0	0	0	0	0	1	0	0	0	0	0	0	0	0	0	0	0	0	0	0	0	0	0
Bacteria(100);Proteobacteria(100);Betaproteobacteria(100);Burkholderiales(100);Alcaligenaceae(97);unclassified;unclassified;	KC873068	Uncultured bacterium clone S41_067 16S ribosomal RNA gene, partial sequence	other	H3QVG8203G3739	Otu432	5	0	5	0	0	0	0	0	0	0	0	0	0	0	0	0	0	0	0	0	0	0	0	0	0	0	4	1	0	0	0	0	0	0	0	0	0	0	0	0	0	0	0	0
Bacteria(100);Firmicutes(100);Bacilli(100);Bacillales(100);Bacillaceae(88);Bacillus(87);unclassified;	KF021782	Bacillus sp. H-100 16S ribosomal RNA gene, partial sequence	Firmicutes	H3QVG8203F7GMS	Otu433	1	0	1	0	0	0	0	0	0	0	0	0	0	0	0	0	0	0	0	0	0	0	0	0	0	0	1	0	0	0	0	0	0	0	0	0	0	0	0	0	0	0	0	0
Bacteria(100);Proteobacteria(100);Alphaproteobacteria(100);Rhodobacterales(99);Rhodobacteraceae(99);unclassified;unclassified;	JF476351	Uncultured Rhodobacter sp. clone 0B046A1_00148 16S ribosomal RNA gene, partial sequence	Alphaproteobacteria	H3QVG8203GB4OV	Otu434	54	0	52	0	0	0	2	0	0	0	0	0	0	0	0	0	0	0	0	0	0	2	0	0	0	5	35	4	0	0	0	0	6	0	0	0	0	0	0	0	0	0	0	0
Bacteria(100);Proteobacteria(100);Alphaproteobacteria(100);Rhizobiales(96);Bradyrhizobiaceae(94);unclassified;unclassified;	JX910102	Bradyrhizobium japonicum strain NR31 16S ribosomal RNA gene, partial sequence	Alphaproteobacteria	H3QVG8203G6KRN	Otu435	1	0	1	0	0	0	0	0	0	0	0	0	0	0	0	0	0	0	0	0	0	0	0	0	0	0	1	0	0	0	0	0	0	0	0	0	0	0	0	0	0	0	0	0
Bacteria(100);Proteobacteria(100);Alphaproteobacteria(100);Sphingomonadales(96);Sphingomonadaceae(96);Kaistobacter(84);unclassified(84);	KC449519	Uncultured alpha proteobacterium clone RLBp6189 16S ribosomal RNA gene, partial sequence	Alphaproteobacteria	H3QVG8203FYO0J	Otu436	7	0	7	0	0	0	0	0	0	0	0	0	0	0	0	0	0	0	0	0	0	0	0	0	0	0	1	0	2	0	3	0	0	0	1	0	0	0	0	0	0	0	0	0
Bacteria(100);Proteobacteria(100);Gammaproteobacteria(100);Alteromonadales(100);Shewanellaceae(100);Shewanella(100);unclassified(91);	KC734351	Bacterium W410 16S ribosomal RNA gene, partial sequence	Gammaproteobacteria	H3QVG8203G96W1	Otu437	1	0	1	0	0	0	0	0	0	0	0	0	0	0	0	0	0	0	0	0	0	0	0	0	0	0	1	0	0	0	0	0	0	0	0	0	0	0	0	0	0	0	0	0
Bacteria(100);Actinobacteria(100);Actinobacteria(100);Actinomycetales(100);Micromonosporaceae(97);unclassified;unclassified;	KC554416	Uncultured bacterium clone 8-467 16S ribosomal RNA gene, partial sequence	Actinomycetales	H3QVG8203G7LWM	Otu438	1	0	1	0	0	0	0	0	0	0	0	0	0	0	0	0	0	0	0	0	0	0	0	0	0	0	1	0	0	0	0	0	0	0	0	0	0	0	0	0	0	0	0	0
Bacteria(100);Actinobacteria(100);Actinobacteria(100);Actinomycetales(100);unclassified;unclassified;unclassified;	KC788071	Cellulomonas oligotrophica strain E62 ZT-21-3 16S ribosomal RNA gene, partial sequence	Actinomycetales	H3QVG8203GH8B6	Otu439	2	0	2	0	0	0	0	0	0	0	0	0	0	0	0	0	0	0	0	0	0	0	0	0	0	0	2	0	0	0	0	0	0	0	0	0	0	0	0	0	0	0	0	0
Bacteria(100);Bacteroidetes(100);Sphingobacteria(99);Sphingobacteriales(99);Flexibacteraceae(97);Cytophaga(97);unclassified(97);	EU133665	Uncultured bacterium clone FFCH11997 16S ribosomal RNA gene, partial sequence	other	H3QVG8203FKRUP	Otu440	1	0	1	0	0	0	0	0	0	0	0	0	0	0	0	0	0	0	0	0	0	0	0	0	0	0	1	0	0	0	0	0	0	0	0	0	0	0	0	0	0	0	0	0
Bacteria(100);Actinobacteria(100);Actinobacteria(100);Actinomycetales(100);unclassified;unclassified;unclassified;	JQ291033	Uncultured Friedmanniella sp. clone MZ3-3-049 16S ribosomal RNA gene, partial sequence	Actinomycetales	H3QVG8203G14S1	Otu441	1	0	1	0	0	0	0	0	0	0	0	0	0	0	0	0	0	0	0	0	0	0	0	0	0	0	1	0	0	0	0	0	0	0	0	0	0	0	0	0	0	0	0	0
Bacteria(100);Proteobacteria(100);Alphaproteobacteria(99);Rhodospirillales(99);Acetobacteraceae(99);unclassified;unclassified;	JQ402771	Uncultured Belnapia sp. clone CNY_03233 16S ribosomal RNA gene, partial sequence	Acetobacteraceae	H3QVG8203G9ZYV	Otu442	4	0	1	0	3	0	0	0	0	0	0	0	0	0	0	0	0	0	0	0	0	0	0	0	0	0	1	0	0	0	0	0	0	0	0	0	0	0	0	0	0	0	0	3
Bacteria(100);Proteobacteria(100);Deltaproteobacteria(100);MIZ46(100);unclassified(100);unclassified(100);unclassified(100);	KC451478	Uncultured delta proteobacterium clone RLBp6360 16S ribosomal RNA gene, partial sequence	other	H3QVG8203G4U3I	Otu443	1	0	1	0	0	0	0	0	0	0	0	0	0	0	0	0	0	0	0	0	0	0	0	0	0	0	1	0	0	0	0	0	0	0	0	0	0	0	0	0	0	0	0	0
Bacteria(100);Chloroflexi(100);Thermomicrobia(100);Sphaerobacterales(100);Sphaerobacterineae(100);HN1-15(100);unclassified(100);	JQ738972	Uncultured bacterium clone SA_64 16S ribosomal RNA gene, partial sequence	other	H3QVG8203G4PB8	Otu444	3	0	3	0	0	0	0	0	0	0	0	0	0	0	0	0	0	0	0	0	0	0	1	0	0	0	2	0	0	0	0	0	0	0	0	0	0	0	0	0	0	0	0	0
Bacteria(100);Bacteroidetes(100);Flavobacteria(89);Flavobacteriales(89);Flavobacteriaceae(89);unclassified;unclassified;	.	.	other	H3QVG8203FT04Q	Otu445	1	0	1	0	0	0	0	0	0	0	0	0	0	0	0	0	0	0	0	0	0	0	0	0	0	0	1	0	0	0	0	0	0	0	0	0	0	0	0	0	0	0	0	0
Bacteria(100);Firmicutes(100);Clostridia(100);Clostridiales(100);Lachnospiraceae(100);Butyrivibrio(84);unclassified(84);	JX640007	Uncultured bacterium clone HA3ER6P01EVPA1 16S ribosomal RNA gene, partial sequence	Firmicutes	H3QVG8203FMG6N	Otu446	1	0	1	0	0	0	0	0	0	0	0	0	0	0	0	0	0	0	0	0	0	0	0	0	0	0	1	0	0	0	0	0	0	0	0	0	0	0	0	0	0	0	0	0
Bacteria(100);Actinobacteria(100);Actinobacteria(100);Actinomycetales(100);unclassified;unclassified;unclassified;	HM559084	Uncultured bacterium clone TIGU555 16S ribosomal RNA gene, partial sequence	Actinomycetales	H3QVG8203GQL2S	Otu447	2	0	1	0	1	0	0	0	0	0	0	0	0	0	0	0	0	0	0	0	0	0	0	0	0	0	1	0	0	0	0	0	0	0	0	0	0	0	0	0	0	0	0	0
Bacteria(100);Tenericutes(100);Erysipelotrichi(100);Erysipelotrichales(100);Erysipelotrichaceae(100);Allobaculum(100);unclassified(100);	AB809059	Clostridium sp. ARIAKE1333 gene for 16S ribosomal RNA, partial sequence	other	H3QVG8203G43TX	Otu448	1	0	1	0	0	0	0	0	0	0	0	0	0	0	0	0	0	0	0	0	0	0	0	0	0	0	1	0	0	0	0	0	0	0	0	0	0	0	0	0	0	0	0	0
Bacteria(100);Actinobacteria(100);Actinobacteria(100);Actinomycetales(94);unclassified;unclassified;unclassified;	HE663622	Uncultured bacterium partial 16S rRNA gene, clone ARC-27	Actinomycetales	H3QVG8203GYDQD	Otu449	1	0	1	0	0	0	0	0	0	0	0	0	0	0	0	0	0	0	0	0	0	0	0	0	0	0	1	0	0	0	0	0	0	0	0	0	0	0	0	0	0	0	0	0
Bacteria(100);Actinobacteria(100);Actinobacteria(100);Actinomycetales(100);Pseudonocardiaceae(90);unclassified;unclassified;	KC820865	Uncultured bacterium clone TERI-AS53 16S ribosomal RNA gene, partial sequence	Actinomycetales	H3QVG8203F4ZYL	Otu450	2	0	2	0	0	0	0	0	0	0	0	0	0	0	0	0	0	0	0	0	0	0	0	0	0	0	2	0	0	0	0	0	0	0	0	0	0	0	0	0	0	0	0	0
Bacteria(100);Firmicutes(100);Clostridia(100);Clostridiales(100);Clostridiaceae(96);unclassified;unclassified;	KF026317	Uncultured bacterium clone EMC-0124 16S ribosomal RNA gene, partial sequence	Firmicutes	H3QVG8203GQ52H	Otu451	1	0	1	0	0	0	0	0	0	0	0	0	0	0	0	0	0	0	0	0	0	0	0	0	0	0	1	0	0	0	0	0	0	0	0	0	0	0	0	0	0	0	0	0
Bacteria(100);Bacteroidetes(100);Bacteroidia(89);Bacteroidales(89);unclassified;unclassified;unclassified;	JX639032	Uncultured bacterium clone HA3ER6P01ASNH4 16S ribosomal RNA gene, partial sequence	other	H3QVG8203GOX37	Otu452	3	0	3	0	0	0	0	0	0	0	0	0	0	0	0	0	0	0	0	0	0	0	0	0	0	0	3	0	0	0	0	0	0	0	0	0	0	0	0	0	0	0	0	0
Bacteria(100);Proteobacteria(100);Alphaproteobacteria(100);Rhodobacterales(100);Rhodobacteraceae(100);Paracoccus(96);Paracoccus_zeaxanthinifaciens(95);	JX239761	Paracoccus sp. UBF-P7 16S ribosomal RNA gene, partial sequence	Alphaproteobacteria	H3QVG8203FPAAR	Otu453	5	0	5	0	0	0	0	0	0	0	0	0	0	0	0	0	0	0	0	0	0	0	0	0	0	0	4	0	0	0	1	0	0	0	0	0	0	0	0	0	0	0	0	0
Bacteria(100);Chloroflexi(100);SOGA31(99);unclassified(99);unclassified(99);unclassified(99);unclassified(99);	DQ195655	Uncultured bacterium isolate High.2.48.G7.HB36 16S ribosomal RNA gene, partial sequence	other	H3QVG8203HDB9W	Otu454	1	0	1	0	0	0	0	0	0	0	0	0	0	0	0	0	0	0	0	0	0	0	0	0	0	0	1	0	0	0	0	0	0	0	0	0	0	0	0	0	0	0	0	0
Bacteria(100);Actinobacteria(100);Actinobacteria(100);Actinomycetales(100);unclassified;unclassified;unclassified;	EU977822	Georgenia sp. 1P07AB 16S ribosomal RNA gene, partial sequence	Actinomycetales	H3QVG8203HD2V9	Otu455	20	0	20	0	0	0	0	0	0	0	0	0	0	0	0	0	0	0	0	0	0	0	0	0	0	0	4	9	0	1	0	0	5	1	0	0	0	0	0	0	0	0	0	0
Bacteria(100);Firmicutes(100);Bacilli(99);Bacillales(99);Planococcaceae(99);Ureibacillus(96);unclassified(96);	KC736319	Uncultured bacterium clone Bact_2011_C_1B-E7 16S ribosomal RNA gene, partial sequence	Firmicutes	H3QVG8203F2N3O	Otu456	1	0	1	0	0	0	0	0	0	0	0	0	0	0	0	0	0	0	0	0	0	0	0	0	0	0	1	0	0	0	0	0	0	0	0	0	0	0	0	0	0	0	0	0
Bacteria(100);Firmicutes(100);Bacilli(100);Bacillales(100);Staphylococcaceae(99);Salinicoccus(99);unclassified;	KC750918	Salinicoccus halodurans strain H3B36 16S ribosomal RNA gene, partial sequence	Firmicutes	H3QVG8203FQACJ	Otu457	723	0	723	0	0	0	0	0	0	0	0	0	0	0	0	0	0	0	0	0	0	0	0	0	0	0	2	715	0	0	4	0	0	2	0	0	0	0	0	0	0	0	0	0
Bacteria(100);Firmicutes(100);Bacilli(100);Lactobacillales(100);Lactobacillaceae(100);Lactobacillus(100);Lactobacillus_crispatus(99);	CP005926	Lactobacillus acidophilus La-14, complete genome	Lactobacillus sp.	H3QVG8203FTCUP	Otu458	93	0	93	0	0	0	0	0	0	0	0	0	0	0	0	0	0	0	0	0	0	0	0	0	0	0	0	93	0	0	0	0	0	0	0	0	0	0	0	0	0	0	0	0
Bacteria(100);Actinobacteria(100);Actinobacteria(100);Actinomycetales(100);unclassified;unclassified;unclassified;	KF002253	Brevibacterium aureum strain ZT3 16S ribosomal RNA gene, partial sequence	Actinomycetales	H3QVG8203GQJCV	Otu459	342	0	336	0	6	0	0	0	0	0	0	0	0	0	0	0	0	0	0	0	0	0	0	0	0	0	3	327	0	0	1	0	2	3	0	0	0	0	0	0	2	0	0	2
Bacteria(100);Firmicutes(100);Bacilli(100);Lactobacillales(100);Lactobacillaceae(99);Lactobacillus(99);Lactobacillus_aviarius(97);	KC449810	Uncultured Bacillus sp. clone RLBp2891 16S ribosomal RNA gene, partial sequence	Lactobacillus sp.	H3QVG8203FZXSX	Otu460	59	0	59	0	0	0	0	0	0	0	0	0	0	0	0	0	0	0	0	0	0	0	0	0	0	0	0	59	0	0	0	0	0	0	0	0	0	0	0	0	0	0	0	0
Bacteria(100);Bacteroidetes(100);Bacteroidia(100);Bacteroidales(100);Bacteroidaceae(94);Bacteroides(94);unclassified;	JN074704	Uncultured bacterium clone HC04_FZZ71GH01AWW9Z 16S ribosomal RNA gene, partial sequence	other	H3QVG8203FVEDJ	Otu461	30	0	30	0	0	0	0	0	0	0	0	0	0	0	0	0	0	0	0	0	0	0	0	0	0	0	0	30	0	0	0	0	0	0	0	0	0	0	0	0	0	0	0	0
Bacteria(100);Firmicutes(100);Clostridia(100);Clostridiales(100);Veillonellaceae(100);Megamonas(100);unclassified(100);	JQ998484	Uncultured bacterium clone GKJWQY101BNDZ7 16S ribosomal RNA gene, partial sequence	Firmicutes	H3QVG8203GQB3M	Otu462	50	0	50	0	0	0	0	0	0	0	0	0	0	0	0	0	0	0	0	0	0	0	0	0	0	0	0	50	0	0	0	0	0	0	0	0	0	0	0	0	0	0	0	0
Bacteria(100);Actinobacteria(100);Actinobacteria(100);Actinomycetales(100);unclassified;unclassified;unclassified;	JF095549	Uncultured bacterium clone ncd1292f11c2 16S ribosomal RNA gene, partial sequence	Actinomycetales	H3QVG8203GXO4B	Otu463	15	0	15	0	0	0	0	0	0	0	0	0	0	0	0	0	0	0	0	0	0	0	0	0	0	0	0	15	0	0	0	0	0	0	0	0	0	0	0	0	0	0	0	0
Bacteria(100);Actinobacteria(100);Actinobacteria(100);Coriobacteriales(99);Coriobacteriaceae(99);Atopobium(83);unclassified(83);	JQ185920	Uncultured bacterium clone BD05440 16S ribosomal RNA gene, partial sequence	other	H3QVG8203F09RA	Otu464	30	0	30	0	0	0	0	0	0	0	0	0	0	0	0	0	0	0	0	0	0	0	0	0	0	0	0	30	0	0	0	0	0	0	0	0	0	0	0	0	0	0	0	0
Bacteria(100);Firmicutes(100);Clostridia(100);Clostridiales(100);Lachnospiraceae(100);Ruminococcus(95);unclassified(95);	JQ248112	Uncultured bacterium clone V-20 16S ribosomal RNA gene, partial sequence	Firmicutes	H3QVG8203GOAM1	Otu465	182	0	182	0	0	0	0	0	0	0	0	0	0	0	0	0	0	0	0	0	0	0	0	0	0	0	8	172	0	0	2	0	0	0	0	0	0	0	0	0	0	0	0	0
Bacteria(100);Actinobacteria(100);Actinobacteria(100);Actinomycetales(100);Dermabacteraceae(82);unclassified;unclassified;	KC810263	Bacterium het-w-4 16S ribosomal RNA gene, partial sequence	Actinomycetales	H3QVG8203FPNXF	Otu466	266	0	264	0	2	0	0	0	0	0	0	0	0	0	0	0	0	0	0	0	0	0	0	0	0	4	14	231	0	0	14	0	0	1	0	0	0	0	0	0	0	0	0	0
Bacteria(100);Bacteroidetes(100);Bacteroidia(100);Bacteroidales(100);Bacteroidaceae(100);Bacteroides(100);unclassified;	KC467172	Uncultured Bacteroides sp. clone MO374_H05 16S ribosomal RNA gene, partial sequence	other	H3QVG8203FOEIF	Otu467	7	0	7	0	0	0	0	0	0	0	0	0	0	0	0	0	0	0	0	0	0	0	0	0	0	0	0	7	0	0	0	0	0	0	0	0	0	0	0	0	0	0	0	0
Bacteria(100);Firmicutes(100);Clostridia(100);Clostridiales(100);Veillonellaceae(100);Phascolarctobacterium(99);unclassified(99);	AB739694	Phascolarctobacterium sp. 377 gene for 16S ribosomal RNA, partial sequence	Firmicutes	H3QVG8203GE02J	Otu468	27	0	27	0	0	0	0	0	0	0	0	0	0	0	0	0	0	0	0	0	0	0	0	0	0	0	0	27	0	0	0	0	0	0	0	0	0	0	0	0	0	0	0	0
Bacteria(100);Bacteroidetes(100);Bacteroidia(100);Bacteroidales(100);Bacteroidaceae(100);Bacteroides(100);unclassified;	KC149851	Uncultured Bacteroidales bacterium clone NECraneWater_1554 16S ribosomal RNA gene, partial sequence	other	H3QVG8203GU58E	Otu469	63	0	63	0	0	0	0	0	0	0	0	0	0	0	0	0	0	0	0	0	0	0	0	0	0	0	0	63	0	0	0	0	0	0	0	0	0	0	0	0	0	0	0	0
Bacteria(100);Firmicutes(100);Bacilli(100);Lactobacillales(97);Carnobacteriaceae(95);Desemzia(87);unclassified;	JX638271	Uncultured bacterium clone HBYTM9302GCWZP 16S ribosomal RNA gene, partial sequence	other	H3QVG8203GZTUK	Otu470	35	0	35	0	0	0	0	0	0	0	0	0	0	0	0	0	0	0	0	0	0	0	1	0	0	0	6	18	3	0	3	0	0	4	0	0	0	0	0	0	0	0	0	0
Bacteria(100);Bacteroidetes(100);Bacteroidia(100);Bacteroidales(100);Bacteroidaceae(100);Bacteroides(100);unclassified;	JX638969	Uncultured bacterium clone HBYTM9302IEW1X 16S ribosomal RNA gene, partial sequence	other	H3QVG8203G9VPZ	Otu471	24	0	24	0	0	0	0	0	0	0	0	0	0	0	0	0	0	0	0	0	0	0	0	0	0	0	0	24	0	0	0	0	0	0	0	0	0	0	0	0	0	0	0	0
Bacteria(100);Bacteroidetes(100);Bacteroidia(100);Bacteroidales(100);Bacteroidaceae(100);Bacteroides(100);Bacteroides_plebeius(100);	JX640172	Uncultured bacterium clone HBYTM9302IJ5IZ 16S ribosomal RNA gene, partial sequence	other	H3QVG8203HIWZD	Otu472	8	0	8	0	0	0	0	0	0	0	0	0	0	0	0	0	0	0	0	0	0	0	0	0	0	0	0	8	0	0	0	0	0	0	0	0	0	0	0	0	0	0	0	0
Bacteria(100);Actinobacteria(100);Actinobacteria(100);Actinomycetales(100);unclassified;unclassified;unclassified;	JQ924130	Actinomycetales bacterium HO2017 16S ribosomal RNA gene, partial sequence	Actinomycetales	H3QVG8203G0FSQ	Otu473	8	0	8	0	0	0	0	0	0	0	0	0	0	0	0	0	0	0	0	0	0	0	0	0	0	0	0	6	0	0	0	2	0	0	0	0	0	0	0	0	0	0	0	0
Bacteria(100);Proteobacteria(100);Betaproteobacteria(100);Burkholderiales(100);unclassified;unclassified;unclassified;	GU622070	Uncultured bacterium clone PF4175 16S ribosomal RNA gene, partial sequence	other	H3QVG8203GKK99	Otu474	21	0	21	0	0	0	0	0	0	0	0	0	0	0	0	0	0	0	0	0	0	0	0	0	0	0	3	18	0	0	0	0	0	0	0	0	0	0	0	0	0	0	0	0
Bacteria(100);Firmicutes(100);Clostridia(100);Clostridiales(100);Ruminococcaceae(100);Faecalibacterium(100);Faecalibacterium_prausnitzii(100);	JQ248110	Uncultured bacterium clone V-18 16S ribosomal RNA gene, partial sequence	Firmicutes	H3QVG8203GLDEF	Otu475	41	0	41	0	0	0	0	0	0	0	0	0	0	0	0	0	0	0	0	0	0	0	0	0	0	0	0	41	0	0	0	0	0	0	0	0	0	0	0	0	0	0	0	0
Bacteria(100);Firmicutes(100);Bacilli(100);Lactobacillales(100);unclassified;unclassified;unclassified;	KC896727	Uncultured Lactobacillaceae bacterium clone AMP_C92-5 16S ribosomal RNA gene, partial sequence	other	H3QVG8203HEO68	Otu476	21	0	21	0	0	0	0	0	0	0	0	0	0	0	0	0	0	0	0	0	0	0	0	0	0	0	0	21	0	0	0	0	0	0	0	0	0	0	0	0	0	0	0	0
Bacteria(100);Bacteroidetes(100);Bacteroidia(100);Bacteroidales(100);Bacteroidaceae(100);Bacteroides(100);Bacteroides_barnesiae(93);	KC467938	Uncultured Bacteroidales bacterium clone MO394_E06 16S ribosomal RNA gene, partial sequence	other	H3QVG8203GD9OI	Otu477	33	0	33	0	0	0	0	0	0	0	0	0	0	0	0	0	0	0	0	0	0	0	0	0	0	0	0	33	0	0	0	0	0	0	0	0	0	0	0	0	0	0	0	0
Bacteria(100);Firmicutes(100);Bacilli(100);Lactobacillales(100);Enterococcaceae(95);Enterococcus(80);unclassified;	KC971332	Uncultured bacterium clone BSNS2251 16S ribosomal RNA gene, partial sequence	other	H3QVG8203FROKE	Otu478	10	0	10	0	0	0	0	0	0	0	0	0	0	0	0	0	0	0	0	0	0	0	0	0	0	0	0	10	0	0	0	0	0	0	0	0	0	0	0	0	0	0	0	0
Bacteria(100);Proteobacteria(100);Betaproteobacteria(100);Burkholderiales(97);Comamonadaceae(96);unclassified;unclassified;	FJ230925	Uncultured bacterium clone F10 16S ribosomal RNA gene, partial sequence	other	H3QVG8203FO74U	Otu479	3	0	3	0	0	0	0	0	0	0	0	0	0	0	0	0	0	0	0	0	0	0	0	0	0	0	0	3	0	0	0	0	0	0	0	0	0	0	0	0	0	0	0	0
Bacteria(100);Firmicutes(100);Bacilli(99);Bacillales(99);unclassified;unclassified;unclassified;	JX861508	Melghirimyces sp. Nari11A 16S ribosomal RNA gene, partial sequence	Firmicutes	H3QVG8203GR93C	Otu480	4	0	4	0	0	0	0	0	0	0	0	0	0	0	0	0	0	0	0	0	0	0	0	0	0	0	0	4	0	0	0	0	0	0	0	0	0	0	0	0	0	0	0	0
Bacteria(100);Firmicutes(100);Bacilli(100);Lactobacillales(100);Carnobacteriaceae(100);unclassified;unclassified;	JF542958	Uncultured bacterium clone GDIC2IK01ER0FT 16S ribosomal RNA gene, partial sequence	other	H3QVG8203G9VAB	Otu481	7	0	7	0	0	0	0	0	0	0	0	0	0	0	0	0	0	0	0	0	0	0	0	0	0	0	0	7	0	0	0	0	0	0	0	0	0	0	0	0	0	0	0	0
Bacteria(100);Proteobacteria(100);Gammaproteobacteria(100);Pseudomonadales(95);Moraxellaceae(85);Acinetobacter(84);unclassified;	KC763178	Acinetobacter sp. NIPH 2171 16S ribosomal RNA gene, partial sequence	Gammaproteobacteria	H3QVG8203HITPD	Otu482	44	0	34	0	0	9	1	0	0	0	0	0	0	0	0	0	0	0	0	0	0	0	0	0	0	5	0	7	0	0	1	1	0	20	0	0	0	0	0	0	0	0	0	0
Bacteria(100);Bacteroidetes(100);Bacteroidia(100);Bacteroidales(100);Bacteroidaceae(97);Bacteroides(97);unclassified;	AB666118	Uncultured bacterium gene for 16S ribosomal RNA, partial sequence, clone: C44	other	H3QVG8203FWQUS	Otu483	5	0	5	0	0	0	0	0	0	0	0	0	0	0	0	0	0	0	0	0	0	0	0	0	0	0	0	5	0	0	0	0	0	0	0	0	0	0	0	0	0	0	0	0
Bacteria(100);Actinobacteria(100);Actinobacteria(100);Actinomycetales(100);Bogoriellaceae(91);Georgenia(91);unclassified(91);	AB211016	Georgenia sp. SSCS26 gene for 16S rRNA, partial sequence, strain: SSCS26	Actinomycetales	H3QVG8203GW0FX	Otu484	4	0	4	0	0	0	0	0	0	0	0	0	0	0	0	0	0	0	0	0	0	0	0	0	0	0	0	4	0	0	0	0	0	0	0	0	0	0	0	0	0	0	0	0
Bacteria(100);Bacteroidetes(100);Flavobacteria(100);Flavobacteriales(100);Flavobacteriaceae(100);unclassified;unclassified;	JQ374762	Uncultured bacterium clone NT42c5_21276 16S ribosomal RNA gene, partial sequence	other	H3QVG8203GYDGI	Otu485	8	0	8	0	0	0	0	0	0	0	0	0	0	0	0	0	0	0	0	0	0	0	0	2	0	0	0	4	0	0	0	0	0	2	0	0	0	0	0	0	0	0	0	0
Bacteria(100);Bacteroidetes(100);Bacteroidia(100);Bacteroidales(100);Porphyromonadaceae(100);Barnesiella(100);unclassified;	NR_041508	Barnesiella viscericola DSM 18177 strain JCM 13660 16S ribosomal RNA, partial sequence	other	H3QVG8203HH3K6	Otu486	2	0	2	0	0	0	0	0	0	0	0	0	0	0	0	0	0	0	0	0	0	0	0	0	0	0	0	2	0	0	0	0	0	0	0	0	0	0	0	0	0	0	0	0
Bacteria(100);Actinobacteria(100);Actinobacteria(100);Actinomycetales(100);Brevibacteriaceae(89);Brevibacterium(89);unclassified(89);	JX636608	Uncultured bacterium clone HBYTM9302JWH32 16S ribosomal RNA gene, partial sequence	Actinomycetales	H3QVG8203G3DGG	Otu487	12	0	12	0	0	0	0	0	0	0	0	0	0	0	0	0	0	0	0	0	0	0	0	0	0	0	0	12	0	0	0	0	0	0	0	0	0	0	0	0	0	0	0	0
Bacteria(100);Actinobacteria(100);Actinobacteria(100);Actinomycetales(100);unclassified;unclassified;unclassified;	JX244077	Nocardiopsis sp. TRM46250 16S ribosomal RNA gene, partial sequence	Actinomycetales	H3QVG8203HE88E	Otu488	4	0	3	0	1	0	0	0	0	0	0	0	0	0	0	0	0	0	0	0	0	0	0	0	0	0	0	3	0	0	0	0	0	0	0	0	0	0	0	0	0	0	0	0
Bacteria(100);Bacteroidetes(100);Flavobacteria(84);Flavobacteriales(84);unclassified;unclassified;unclassified;	JX109558	Uncultured bacterium clone MID41_33489 16S ribosomal RNA gene, partial sequence	other	H3QVG8203HEWPF	Otu489	5	0	5	0	0	0	0	0	0	0	0	0	0	0	0	0	0	0	0	0	0	0	0	0	0	0	0	5	0	0	0	0	0	0	0	0	0	0	0	0	0	0	0	0
Bacteria(100);Actinobacteria(100);Actinobacteria(100);Actinomycetales(100);Microbacteriaceae(85);unclassified;unclassified;	JF386037	Uncultured soil bacterium clone GO0VNXF07IG2CV 16S ribosomal RNA gene, partial sequence	Actinomycetales	H3QVG8203FUFO0	Otu490	2	0	2	0	0	0	0	0	0	0	0	0	0	0	0	0	0	0	0	0	0	0	0	0	0	0	0	2	0	0	0	0	0	0	0	0	0	0	0	0	0	0	0	0
Bacteria(100);Bacteroidetes(100);Bacteroidia(100);Bacteroidales(100);Bacteroidaceae(80);Bacteroides(80);unclassified;	KC467156	Uncultured Bacteroidales bacterium clone MO374_F02 16S ribosomal RNA gene, partial sequence	other	H3QVG8203GCZ19	Otu491	13	0	13	0	0	0	0	0	0	0	0	0	0	0	0	0	0	0	0	0	0	0	0	0	0	0	0	13	0	0	0	0	0	0	0	0	0	0	0	0	0	0	0	0
Bacteria(100);Bacteroidetes(100);unclassified;unclassified;unclassified;unclassified;unclassified;	JQ373908	Uncultured bacterium clone NT32d9_21159 16S ribosomal RNA gene, partial sequence	other	H3QVG8203FZKCY	Otu492	2	0	2	0	0	0	0	0	0	0	0	0	0	0	0	0	0	0	0	0	0	0	0	0	0	0	0	2	0	0	0	0	0	0	0	0	0	0	0	0	0	0	0	0
Bacteria(100);Actinobacteria(100);Actinobacteria(100);Actinomycetales(100);unclassified;unclassified;unclassified;	JQ419660	Dermacoccus sp. P3708 16S ribosomal RNA gene, partial sequence	Actinomycetales	H3QVG8203HCUVD	Otu493	2	0	2	0	0	0	0	0	0	0	0	0	0	0	0	0	0	0	0	0	0	0	0	0	0	0	0	2	0	0	0	0	0	0	0	0	0	0	0	0	0	0	0	0
Bacteria(100);Proteobacteria(100);Alphaproteobacteria(92);Sphingomonadales(92);Sphingomonadaceae(92);unclassified;unclassified;	KC476256	Uncultured bacterium clone MVB250 16S ribosomal RNA gene, partial sequence	Alphaproteobacteria	H3QVG8203FM41R	Otu494	3	0	2	0	1	0	0	0	0	0	0	0	0	0	0	0	0	0	0	0	0	0	0	0	0	0	0	2	0	0	0	0	0	0	0	0	0	0	0	0	0	0	0	0
Bacteria(100);Proteobacteria(100);Epsilonproteobacteria(100);Campylobacterales(100);Helicobacteraceae(100);Helicobacter(99);unclassified;	JX095834	Uncultured bacterium clone C2-80 16S ribosomal RNA gene, partial sequence	other	H3QVG8203GZRZ1	Otu495	3	0	3	0	0	0	0	0	0	0	0	0	0	0	0	0	0	0	0	0	0	0	0	0	0	0	0	3	0	0	0	0	0	0	0	0	0	0	0	0	0	0	0	0
Bacteria(100);Bacteroidetes(100);Flavobacteria(85);Flavobacteriales(85);Flavobacteriaceae(85);unclassified;unclassified;	JX633345	Uncultured bacterium clone G8XQE6O04H7P3O 16S ribosomal RNA gene, partial sequence	other	H3QVG8203G2HUA	Otu496	2	0	2	0	0	0	0	0	0	0	0	0	0	0	0	0	0	0	0	0	0	0	0	0	0	0	0	2	0	0	0	0	0	0	0	0	0	0	0	0	0	0	0	0
Bacteria(100);Proteobacteria(100);Deltaproteobacteria(100);Myxococcales(99);Cystobacteraceae(81);unclassified;unclassified;	KC456317	Cystobacter sp. 42-jj-4 16S ribosomal RNA gene, partial sequence	other	H3QVG8203FWVZG	Otu497	5	0	5	0	0	0	0	0	0	0	0	0	0	0	0	0	0	0	0	0	0	2	0	0	0	0	0	3	0	0	0	0	0	0	0	0	0	0	0	0	0	0	0	0
Bacteria(100);Actinobacteria(100);Actinobacteria(100);Coriobacteriales(100);Coriobacteriaceae(100);Atopobium(84);unclassified(84);	JQ185920	Uncultured bacterium clone BD05440 16S ribosomal RNA gene, partial sequence	other	H3QVG8203HC29D	Otu498	3	0	3	0	0	0	0	0	0	0	0	0	0	0	0	0	0	0	0	0	0	0	0	0	0	0	0	3	0	0	0	0	0	0	0	0	0	0	0	0	0	0	0	0
Bacteria(100);Actinobacteria(100);Actinobacteria(100);Actinomycetales(100);unclassified;unclassified;unclassified;	CP004048	Corynebacterium glutamicum SCgG2, complete genome	Actinomycetales	H3QVG8203GEBTL	Otu499	5	0	5	0	0	0	0	0	0	0	0	0	0	0	0	0	0	0	0	0	0	0	0	0	0	0	0	5	0	0	0	0	0	0	0	0	0	0	0	0	0	0	0	0
Bacteria(100);Proteobacteria(100);Alphaproteobacteria(100);Rhodobacterales(100);Rhodobacteraceae(100);Rhodobacter(96);unclassified(96);	JX635629	Uncultured bacterium clone HBYTM9301BOONB 16S ribosomal RNA gene, partial sequence	Alphaproteobacteria	H3QVG8203GHRMS	Otu500	2	0	2	0	0	0	0	0	0	0	0	0	0	0	0	0	0	0	0	0	0	0	0	0	0	0	0	2	0	0	0	0	0	0	0	0	0	0	0	0	0	0	0	0
Bacteria(100);Tenericutes(100);Erysipelotrichi(100);Erysipelotrichales(100);Erysipelotrichaceae(100);Clostridium(96);unclassified(96);	HE814385	Uncultured bacterium partial 16S rRNA gene, clone OTU160	other	H3QVG8203GFS3X	Otu501	7	0	7	0	0	0	0	0	0	0	0	0	0	0	0	0	0	0	0	0	0	0	0	0	0	0	0	7	0	0	0	0	0	0	0	0	0	0	0	0	0	0	0	0
Bacteria(100);Firmicutes(100);Bacilli(100);Bacillales(100);unclassified;unclassified;unclassified;	AJ489371	Paenibacillus sp. Lgg15.15 partial 16S rRNA gene, strain Lgg15.15	Firmicutes	H3QVG8203GYVG2	Otu502	5	0	5	0	0	0	0	0	0	0	0	0	0	0	0	0	0	0	0	0	0	0	0	0	0	0	0	5	0	0	0	0	0	0	0	0	0	0	0	0	0	0	0	0
Bacteria(100);Firmicutes(100);Bacilli(100);Bacillales(100);unclassified;unclassified;unclassified;	HQ120871	Uncultured bacterium isolate 1112934634116 16S ribosomal RNA gene, partial sequence	Firmicutes	H3QVG8203F8YYN	Otu503	4	0	4	0	0	0	0	0	0	0	0	0	0	0	0	0	0	0	0	0	0	0	0	0	0	0	0	4	0	0	0	0	0	0	0	0	0	0	0	0	0	0	0	0
Bacteria(100);Actinobacteria(100);Actinobacteria(100);Actinomycetales(100);Micrococcaceae(91);Rothia(90);unclassified(90);	JX869543	Rothia terrae strain PSF-B4A-SW 16S ribosomal RNA gene, partial sequence	Actinomycetales	H3QVG8203FTWEV	Otu504	1	0	1	0	0	0	0	0	0	0	0	0	0	0	0	0	0	0	0	0	0	0	0	0	0	0	0	1	0	0	0	0	0	0	0	0	0	0	0	0	0	0	0	0
Bacteria(100);Bacteroidetes(100);Flavobacteria(100);Flavobacteriales(100);Flavobacteriaceae(100);Chryseobacterium(99);unclassified;	KF017580	Chryseobacterium indologenes strain ZYF120413-7 16S ribosomal RNA gene, partial sequence	other	H3QVG8203FT2IH	Otu505	28	0	26	0	2	0	0	0	0	0	0	0	0	0	0	0	0	0	0	0	0	0	0	0	0	0	0	10	7	0	0	0	2	7	0	2	0	0	0	0	0	0	0	0
Bacteria(100);Proteobacteria(100);Betaproteobacteria(100);Burkholderiales(100);unclassified;unclassified;unclassified;	JX637805	Uncultured bacterium clone HA3ER6P01EZCCV 16S ribosomal RNA gene, partial sequence	other	H3QVG8203GS0SA	Otu506	1	0	1	0	0	0	0	0	0	0	0	0	0	0	0	0	0	0	0	0	0	0	0	0	0	0	0	1	0	0	0	0	0	0	0	0	0	0	0	0	0	0	0	0
Bacteria(100);Firmicutes(100);Bacilli(100);Bacillales(100);Staphylococcaceae(97);Salinicoccus(97);Salinicoccus_halodurans(96);	EU432572	Salinicoccus sp. 10093 16S ribosomal RNA gene, partial sequence	Firmicutes	H3QVG8203GGQAB	Otu507	16	0	16	0	0	0	0	0	0	0	0	0	0	0	0	0	0	0	0	0	0	0	1	0	0	0	0	8	0	0	0	0	7	0	0	0	0	0	0	0	0	0	0	0
Bacteria(100);Bacteroidetes(100);Sphingobacteria(94);Sphingobacteriales(94);Sphingobacteriaceae(92);Pedobacter(82);unclassified(81);	JX949238	Mucilaginibacter sp. Hh36 16S ribosomal RNA gene, partial sequence	other	H3QVG8203G1IO6	Otu508	3	0	3	0	0	0	0	0	0	0	0	0	0	0	0	0	0	0	0	0	0	0	0	0	0	0	1	2	0	0	0	0	0	0	0	0	0	0	0	0	0	0	0	0
Bacteria(100);Proteobacteria(100);Betaproteobacteria(100);Burkholderiales(90);unclassified;unclassified;unclassified;	JX637805	Uncultured bacterium clone HA3ER6P01EZCCV 16S ribosomal RNA gene, partial sequence	other	H3QVG8203HAR3I	Otu509	1	0	1	0	0	0	0	0	0	0	0	0	0	0	0	0	0	0	0	0	0	0	0	0	0	0	0	1	0	0	0	0	0	0	0	0	0	0	0	0	0	0	0	0
Bacteria(100);Firmicutes(100);Bacilli(100);Bacillales(100);Paenibacillaceae(99);Paenibacillus(99);Paenibacillus_amylolyticus(83);	JQ977193	Paenibacillus sp. Rs5 16S ribosomal RNA gene, partial sequence	Firmicutes	H3QVG8203G9Y7X	Otu510	1	0	1	0	0	0	0	0	0	0	0	0	0	0	0	0	0	0	0	0	0	0	0	0	0	0	0	1	0	0	0	0	0	0	0	0	0	0	0	0	0	0	0	0
Bacteria(100);Firmicutes(100);Bacilli(100);Bacillales(100);unclassified;unclassified;unclassified;	JQ775299	Uncultured Bacillus sp. clone ASC671 16S ribosomal RNA gene, partial sequence	Firmicutes	H3QVG8203GI2TL	Otu511	4	0	2	0	2	0	0	0	0	0	0	0	0	0	0	0	0	0	0	0	0	0	0	0	0	0	0	2	0	0	0	0	0	0	0	0	1	0	0	0	0	0	1	0
Bacteria(100);Actinobacteria(100);Actinobacteria(100);Actinomycetales(100);unclassified;unclassified;unclassified;	JQ028706	Corynebacterium sp. mare20 16S ribosomal RNA gene, partial sequence	Actinomycetales	H3QVG8203GXRDX	Otu512	1	0	1	0	0	0	0	0	0	0	0	0	0	0	0	0	0	0	0	0	0	0	0	0	0	0	0	1	0	0	0	0	0	0	0	0	0	0	0	0	0	0	0	0
Bacteria(100);Firmicutes(100);Bacilli(100);Lactobacillales(99);Carnobacteriaceae(99);unclassified;unclassified;	JF672125	Uncultured bacterium clone GDIC2IK01BAXDV 16S ribosomal RNA gene, partial sequence	other	H3QVG8203FZCBF	Otu513	2	0	1	0	1	0	0	0	0	0	0	0	0	0	0	0	0	0	0	0	0	0	0	0	0	0	0	1	0	0	0	0	0	0	0	0	0	0	0	0	0	0	0	1
Bacteria(100);Proteobacteria(100);Betaproteobacteria(100);Burkholderiales(100);Alcaligenaceae(97);Sutterella(97);unclassified(97);	JN074496	Uncultured bacterium clone HC04_FZZ71GH01AQ3YS 16S ribosomal RNA gene, partial sequence	other	H3QVG8203F22KS	Otu514	1	0	1	0	0	0	0	0	0	0	0	0	0	0	0	0	0	0	0	0	0	0	0	0	0	0	0	1	0	0	0	0	0	0	0	0	0	0	0	0	0	0	0	0
Bacteria(100);Bacteroidetes(100);Sphingobacteria(100);Sphingobacteriales(100);Sphingobacteriaceae(100);Sphingobacterium(100);unclassified(81);	KC211808	Uncultured Flavobacterium sp. clone R1b_F6 16S ribosomal RNA gene, partial sequence	other	H3QVG8203GUBCV	Otu515	1	0	1	0	0	0	0	0	0	0	0	0	0	0	0	0	0	0	0	0	0	0	0	0	0	0	0	1	0	0	0	0	0	0	0	0	0	0	0	0	0	0	0	0
Bacteria(100);Actinobacteria(100);Actinobacteria(100);Coriobacteriales(100);Coriobacteriaceae(100);Olsenella(82);unclassified(81);	AB739700	Olsenella sp. 1183 gene for 16S ribosomal RNA, partial sequence	other	H3QVG8203GGC2V	Otu516	11	0	11	0	0	0	0	0	0	0	0	0	0	0	0	0	0	0	0	0	0	0	0	0	0	0	0	11	0	0	0	0	0	0	0	0	0	0	0	0	0	0	0	0
Bacteria(100);Actinobacteria(100);Actinobacteria(99);Actinomycetales(98);unclassified;unclassified;unclassified;	.	.	Actinomycetales	H3QVG8203G23LG	Otu517	2	0	2	0	0	0	0	0	0	0	0	0	0	0	0	0	0	0	0	0	0	0	0	0	0	0	0	2	0	0	0	0	0	0	0	0	0	0	0	0	0	0	0	0
Bacteria(100);Cyanobacteria(100);4C0d-2(100);YS2(100);unclassified(100);unclassified(100);unclassified(100);	JQ795411	Uncultured delta proteobacterium clone Aug-PC341 16S ribosomal RNA gene, partial sequence	other	H3QVG8203F97HV	Otu518	1	0	1	0	0	0	0	0	0	0	0	0	0	0	0	0	0	0	0	0	0	0	0	0	0	0	0	1	0	0	0	0	0	0	0	0	0	0	0	0	0	0	0	0
Bacteria(100);Firmicutes(100);Clostridia(100);Clostridiales(100);Ruminococcaceae(99);Ruminococcus(83);unclassified;	JX643016	Uncultured bacterium clone HBYTM9301DFLW3 16S ribosomal RNA gene, partial sequence	Firmicutes	H3QVG8203FN3QC	Otu519	1	0	1	0	0	0	0	0	0	0	0	0	0	0	0	0	0	0	0	0	0	0	0	0	0	0	0	1	0	0	0	0	0	0	0	0	0	0	0	0	0	0	0	0
Bacteria(100);Bacteroidetes(100);unclassified;unclassified;unclassified;unclassified;unclassified;	.	.	other	H3QVG8203F0OAT	Otu520	5	0	5	0	0	0	0	0	0	0	0	0	0	0	0	0	0	0	0	0	0	0	0	0	0	0	0	5	0	0	0	0	0	0	0	0	0	0	0	0	0	0	0	0
Bacteria(100);Proteobacteria(100);Betaproteobacteria(100);Burkholderiales(100);Comamonadaceae(84);unclassified;unclassified;	KC010298	Xenophilus sp. YW8 16S ribosomal RNA gene, partial sequence	other	H3QVG8203GTG4O	Otu521	1	0	1	0	0	0	0	0	0	0	0	0	0	0	0	0	0	0	0	0	0	0	0	0	0	0	0	1	0	0	0	0	0	0	0	0	0	0	0	0	0	0	0	0
Bacteria(100);Actinobacteria(100);Actinobacteria(100);Actinomycetales(100);Micrococcaceae(86);Rothia(81);unclassified;	KC554189	Uncultured bacterium clone 4-76 16S ribosomal RNA gene, partial sequence	Actinomycetales	H3QVG8203HBRHP	Otu522	1	0	1	0	0	0	0	0	0	0	0	0	0	0	0	0	0	0	0	0	0	0	0	0	0	0	0	1	0	0	0	0	0	0	0	0	0	0	0	0	0	0	0	0
Bacteria(100);Actinobacteria(100);Actinobacteria(100);Actinomycetales(100);unclassified;unclassified;unclassified;	JF163553	Uncultured bacterium clone ncd1897g08c1 16S ribosomal RNA gene, partial sequence	Actinomycetales	H3QVG8203GPZJ6	Otu523	1	0	1	0	0	0	0	0	0	0	0	0	0	0	0	0	0	0	0	0	0	0	0	0	0	0	0	1	0	0	0	0	0	0	0	0	0	0	0	0	0	0	0	0
Bacteria(100);Proteobacteria(100);Betaproteobacteria(100);Burkholderiales(100);Oxalobacteraceae(90);Naxibacter(81);unclassified;	HF952670	Massilia varians partial 16S rRNA gene, isolate 0609ALT48R4-PH1	other	H3QVG8203GAEOQ	Otu524	3	0	3	0	0	0	0	0	0	0	0	0	0	0	0	0	0	0	0	0	0	0	0	0	0	0	1	2	0	0	0	0	0	0	0	0	0	0	0	0	0	0	0	0
Bacteria(100);Bacteroidetes(100);Sphingobacteria(99);Sphingobacteriales(99);Sphingobacteriaceae(99);Pedobacter(95);unclassified;	JQ793407	Uncultured Bacteroidetes bacterium clone SGR31 16S ribosomal RNA gene, partial sequence	other	H3QVG8203F8U69	Otu525	12	0	11	0	1	0	0	0	0	0	0	0	0	0	0	0	0	0	0	0	0	0	0	0	0	0	0	2	6	3	0	0	0	0	0	0	0	1	0	0	0	0	0	0
Bacteria(100);Actinobacteria(100);Actinobacteria(100);Actinomycetales(100);Glycomycetaceae(97);unclassified;unclassified;	HM306367	Uncultured bacterium clone ncd861e02c1 16S ribosomal RNA gene, partial sequence	Actinomycetales	H3QVG8203GVA96	Otu526	2	0	2	0	0	0	0	0	0	0	0	0	0	0	0	0	0	0	0	0	0	0	0	0	0	0	0	2	0	0	0	0	0	0	0	0	0	0	0	0	0	0	0	0
Bacteria(100);Firmicutes(100);Bacilli(100);Bacillales(100);Planococcaceae(99);Lysinibacillus(96);unclassified(96);	EU535157	Uncultured bacterium clone nbt171f09 16S ribosomal RNA gene, partial sequence	Firmicutes	H3QVG8203GBGXH	Otu527	1	0	1	0	0	0	0	0	0	0	0	0	0	0	0	0	0	0	0	0	0	0	0	0	0	0	0	1	0	0	0	0	0	0	0	0	0	0	0	0	0	0	0	0
Bacteria(100);Actinobacteria(100);Actinobacteria(100);Actinomycetales(100);Streptomycetaceae(94);Streptomyces(92);unclassified(81);	KF151040	Streptomyces sp. YIM 68119 16S ribosomal RNA gene, partial sequence	Actinomycetales	H3QVG8203G08NJ	Otu528	9	0	7	0	0	0	2	0	0	0	0	0	0	0	0	0	0	0	0	0	0	0	0	0	0	0	1	3	1	0	2	0	0	0	0	0	0	0	0	0	0	0	0	0
Bacteria(100);Actinobacteria(100);Actinobacteria(100);Actinomycetales(99);unclassified;unclassified;unclassified;	KC469096	Demequina sp. EM190 16S ribosomal RNA gene, partial sequence	Actinomycetales	H3QVG8203F4C48	Otu529	1	0	1	0	0	0	0	0	0	0	0	0	0	0	0	0	0	0	0	0	0	0	0	0	0	0	0	1	0	0	0	0	0	0	0	0	0	0	0	0	0	0	0	0
Bacteria(100);Firmicutes(100);Bacilli(100);Bacillales(100);Planococcaceae(95);Sporosarcina(80);unclassified;	JN595094	Uncultured bacterium clone LL4f2_21-T7 16S ribosomal RNA gene, partial sequence	Firmicutes	H3QVG8203GT80A	Otu530	1	0	1	0	0	0	0	0	0	0	0	0	0	0	0	0	0	0	0	0	0	0	0	0	0	0	0	1	0	0	0	0	0	0	0	0	0	0	0	0	0	0	0	0
Bacteria(100);Actinobacteria(100);Actinobacteria(100);Actinomycetales(100);unclassified;unclassified;unclassified;	JF545018	Uncultured bacterium clone GDIC2IK01CN46O 16S ribosomal RNA gene, partial sequence	Actinomycetales	H3QVG8203G3PV9	Otu531	6	0	6	0	0	0	0	0	0	0	0	0	0	0	0	0	0	0	0	0	0	0	1	0	0	0	0	5	0	0	0	0	0	0	0	0	0	0	0	0	0	0	0	0
Bacteria(100);Actinobacteria(100);Actinobacteria(100);Actinomycetales(100);unclassified;unclassified;unclassified;	JF095549	Uncultured bacterium clone ncd1292f11c2 16S ribosomal RNA gene, partial sequence	Actinomycetales	H3QVG8203G4974	Otu532	3	0	3	0	0	0	0	0	0	0	0	0	0	0	0	0	0	0	0	0	0	0	0	0	0	0	0	3	0	0	0	0	0	0	0	0	0	0	0	0	0	0	0	0
Bacteria(100);Proteobacteria(100);Gammaproteobacteria(100);Xanthomonadales(98);Xanthomonadaceae(98);unclassified;unclassified;	JX631738	Uncultured bacterium clone G8XQE6O03FU0O9 16S ribosomal RNA gene, partial sequence	Gammaproteobacteria	H3QVG8203F36OM	Otu533	9	0	9	0	0	0	0	0	0	0	0	0	0	0	0	0	0	0	0	0	0	0	0	0	0	0	5	4	0	0	0	0	0	0	0	0	0	0	0	0	0	0	0	0
Bacteria(100);Bacteroidetes(100);Flavobacteria(100);Flavobacteriales(100);Flavobacteriaceae(100);Flavobacterium(100);unclassified;	KC701560	Uncultured bacterium clone S139 16S ribosomal RNA gene, partial sequence	other	H3QVG8203G4GKV	Otu534	1	0	1	0	0	0	0	0	0	0	0	0	0	0	0	0	0	0	0	0	0	0	0	0	0	0	0	1	0	0	0	0	0	0	0	0	0	0	0	0	0	0	0	0
Bacteria(100);Actinobacteria(100);Actinobacteria(100);Actinomycetales(100);unclassified;unclassified;unclassified;	JX633668	Uncultured bacterium clone G8XQE6O04I7M6W 16S ribosomal RNA gene, partial sequence	Actinomycetales	H3QVG8203F4UZ9	Otu535	9	0	9	0	0	0	0	0	0	0	0	0	0	0	0	0	0	0	0	0	0	0	0	0	0	0	5	4	0	0	0	0	0	0	0	0	0	0	0	0	0	0	0	0
Bacteria(100);Proteobacteria(100);Betaproteobacteria(100);Burkholderiales(96);unclassified;unclassified;unclassified;	JQ373092	Uncultured bacterium clone NTS001Fastb9_8729 16S ribosomal RNA gene, partial sequence	other	H3QVG8203GQC62	Otu536	1	0	1	0	0	0	0	0	0	0	0	0	0	0	0	0	0	0	0	0	0	0	0	0	0	0	0	1	0	0	0	0	0	0	0	0	0	0	0	0	0	0	0	0
Bacteria(100);Actinobacteria(100);Actinobacteria(100);Actinomycetales(100);Micromonosporaceae(97);unclassified;unclassified;	KC554416	Uncultured bacterium clone 8-467 16S ribosomal RNA gene, partial sequence	Actinomycetales	H3QVG8203GBDPY	Otu537	2	0	1	0	1	0	0	0	0	0	0	0	0	0	0	0	0	0	0	0	0	0	0	0	0	0	0	1	0	0	0	0	0	0	0	1	0	0	0	0	0	0	0	0
Bacteria(100);Bacteroidetes(100);Bacteroidia(100);Bacteroidales(100);Bacteroidaceae(99);Bacteroides(99);unclassified;	JX638969	Uncultured bacterium clone HBYTM9302IEW1X 16S ribosomal RNA gene, partial sequence	other	H3QVG8203GLQXR	Otu538	1	0	1	0	0	0	0	0	0	0	0	0	0	0	0	0	0	0	0	0	0	0	0	0	0	0	0	1	0	0	0	0	0	0	0	0	0	0	0	0	0	0	0	0
Bacteria(100);Bacteroidetes(100);Sphingobacteria(100);Sphingobacteriales(100);Sphingobacteriaceae(100);Sphingobacterium(99);unclassified;	KF040986	Sphingobacterium multivorum strain CA77 16S ribosomal RNA gene, partial sequence	other	H3QVG8203FRUIV	Otu539	1	0	1	0	0	0	0	0	0	0	0	0	0	0	0	0	0	0	0	0	0	0	0	0	0	0	0	1	0	0	0	0	0	0	0	0	0	0	0	0	0	0	0	0
Bacteria(100);Gemmatimonadetes(100);Gemmatimonadetes(100);Gemmatimonadales(100);Gemmatimonadaceae(100);unclassified;unclassified;	KC452969	Uncultured Gemmatimonadetes bacterium clone RLBp5484 16S ribosomal RNA gene, partial sequence	other	H3QVG8203FKOW3	Otu540	1	0	1	0	0	0	0	0	0	0	0	0	0	0	0	0	0	0	0	0	0	0	0	0	0	0	0	1	0	0	0	0	0	0	0	0	0	0	0	0	0	0	0	0
Bacteria(100);Actinobacteria(100);Actinobacteria(100);Actinomycetales(100);Dermabacteraceae(98);Brachybacterium(98);Brachybacterium_fresconis(86);	HM306185	Uncultured bacterium clone ncd862d06c1 16S ribosomal RNA gene, partial sequence	Actinomycetales	H3QVG8203G6XQS	Otu541	1	0	1	0	0	0	0	0	0	0	0	0	0	0	0	0	0	0	0	0	0	0	0	0	0	0	0	1	0	0	0	0	0	0	0	0	0	0	0	0	0	0	0	0
Bacteria(100);Firmicutes(100);Bacilli(100);Lactobacillales(100);Lactobacillaceae(100);Lactobacillus(100);unclassified;	KC920821	Lactobacillus mucosae strain KT4 16S ribosomal RNA gene, partial sequence	Lactobacillus sp.	H3QVG8203HC6KV	Otu542	1	0	1	0	0	0	0	0	0	0	0	0	0	0	0	0	0	0	0	0	0	0	0	0	0	0	0	1	0	0	0	0	0	0	0	0	0	0	0	0	0	0	0	0
Bacteria(100);Proteobacteria(100);Epsilonproteobacteria(100);Campylobacterales(100);Helicobacteraceae(100);Helicobacter(97);unclassified;	AY686609	Helicobacter trogontum strain MIT 95-5368 16S ribosomal RNA gene, partial sequence	other	H3QVG8203F6564	Otu543	1	0	1	0	0	0	0	0	0	0	0	0	0	0	0	0	0	0	0	0	0	0	0	0	0	0	0	1	0	0	0	0	0	0	0	0	0	0	0	0	0	0	0	0
Bacteria(100);Actinobacteria(100);Actinobacteria(100);Actinomycetales(100);Intrasporangiaceae(98);Janibacter(98);unclassified(98);	KC844795	Janibacter anophelis strain AL-11 16S ribosomal RNA gene, partial sequence	Actinomycetales	H3QVG8203F6EG0	Otu544	23	0	23	0	0	0	0	0	0	0	0	0	0	0	0	0	0	0	0	0	0	0	0	0	0	5	2	14	0	0	2	0	0	0	0	0	0	0	0	0	0	0	0	0
Bacteria(100);Proteobacteria(100);Alphaproteobacteria(99);unclassified;unclassified;unclassified;unclassified;	JQ385589	Uncultured bacterium clone NT32f2_14405 16S ribosomal RNA gene, partial sequence	Alphaproteobacteria	H3QVG8203GQS8L	Otu545	1	0	1	0	0	0	0	0	0	0	0	0	0	0	0	0	0	0	0	0	0	0	0	0	0	0	0	1	0	0	0	0	0	0	0	0	0	0	0	0	0	0	0	0
Bacteria(100);Actinobacteria(100);Actinobacteria(100);Actinomycetales(100);unclassified;unclassified;unclassified;	FN357184	Nesterenkonia sp. K1-252 partial 16S rRNA gene, strain K1-252	Actinomycetales	H3QVG8203GDJ6H	Otu546	1	0	1	0	0	0	0	0	0	0	0	0	0	0	0	0	0	0	0	0	0	0	0	0	0	0	0	1	0	0	0	0	0	0	0	0	0	0	0	0	0	0	0	0
Bacteria(100);Firmicutes(100);Bacilli(98);Lactobacillales(98);Streptococcaceae(98);Lactococcus(87);unclassified(85);	AB749378	Uncultured Lactococcus sp. gene for 16S ribosomal RNA, partial sequence, clone: Co2-9	other	H3QVG8203F41FT	Otu547	1	0	1	0	0	0	0	0	0	0	0	0	0	0	0	0	0	0	0	0	0	0	0	0	0	0	0	1	0	0	0	0	0	0	0	0	0	0	0	0	0	0	0	0
Bacteria(100);Actinobacteria(100);Actinobacteria(100);Actinomycetales(100);Microbacteriaceae(96);Pseudoclavibacter(96);Zimmermannella_bifida(96);	FJ674756	Uncultured bacterium clone LL141-5C6 16S ribosomal RNA gene, partial sequence	Actinomycetales	H3QVG8203FUTVN	Otu548	1	0	1	0	0	0	0	0	0	0	0	0	0	0	0	0	0	0	0	0	0	0	0	0	0	0	0	1	0	0	0	0	0	0	0	0	0	0	0	0	0	0	0	0
Bacteria(100);Firmicutes(100);Bacilli(100);Bacillales(100);Paenibacillaceae(87);Paenibacillus(87);unclassified;	HQ329105	Paenibacillus sp. CH-3 16S ribosomal RNA gene, partial sequence	Firmicutes	H3QVG8203HH51V	Otu549	2	0	2	0	0	0	0	0	0	0	0	0	0	0	0	0	0	0	0	0	0	0	0	0	0	0	0	2	0	0	0	0	0	0	0	0	0	0	0	0	0	0	0	0
Bacteria(100);Firmicutes(100);Clostridia(97);Clostridiales(97);Lachnospiraceae(95);Eubacterium(83);unclassified(83);	JX634242	Uncultured bacterium clone G8XQE6O04IN1DP 16S ribosomal RNA gene, partial sequence	Firmicutes	H3QVG8203F6H15	Otu550	2	0	2	0	0	0	0	0	0	0	0	0	0	0	0	0	0	0	0	0	0	0	0	0	0	0	0	2	0	0	0	0	0	0	0	0	0	0	0	0	0	0	0	0
Bacteria(100);Firmicutes(100);Clostridia(100);Clostridiales(100);Ruminococcaceae(97);unclassified;unclassified;	JX543456	Uncultured Ruminococcaceae bacterium clone L-93 16S ribosomal RNA gene, partial sequence	Firmicutes	H3QVG8203F5WU1	Otu551	1	0	1	0	0	0	0	0	0	0	0	0	0	0	0	0	0	0	0	0	0	0	0	0	0	0	0	1	0	0	0	0	0	0	0	0	0	0	0	0	0	0	0	0
Bacteria(100);Actinobacteria(100);Actinobacteria(100);Actinomycetales(100);Microbacteriaceae(93);unclassified;unclassified;	KC355289	Microbacterium arabinogalactanolyticum strain KUDC1782 16S ribosomal RNA gene, partial sequence	Actinomycetales	H3QVG8203FQFVG	Otu552	3	0	3	0	0	0	0	0	0	0	0	0	0	0	0	0	0	0	0	0	0	0	0	0	0	0	0	3	0	0	0	0	0	0	0	0	0	0	0	0	0	0	0	0
Bacteria(100);Actinobacteria(100);Actinobacteria(100);Actinomycetales(100);Pseudonocardiaceae(81);unclassified;unclassified;	JX632301	Uncultured bacterium clone G8XQE6O03GFL3A 16S ribosomal RNA gene, partial sequence	Actinomycetales	H3QVG8203FQXB1	Otu553	25	0	25	0	0	0	0	0	0	0	0	0	0	0	0	0	0	0	0	0	0	0	0	0	0	0	5	14	0	0	0	2	4	0	0	0	0	0	0	0	0	0	0	0
Bacteria(100);Firmicutes(100);Bacilli(100);Bacillales(100);Bacillaceae_2(92);Sinobaca(92);unclassified;	JN601483	Sinobaca beijingensis 16S ribosomal RNA gene, partial sequence	Firmicutes	H3QVG8203FW097	Otu554	1	0	1	0	0	0	0	0	0	0	0	0	0	0	0	0	0	0	0	0	0	0	0	0	0	0	0	1	0	0	0	0	0	0	0	0	0	0	0	0	0	0	0	0
Bacteria(100);Proteobacteria(100);Alphaproteobacteria(100);Caulobacterales(100);Caulobacteraceae(100);Brevundimonas(100);Brevundimonas_diminuta(100);	KC866180	Brevundimonas terrae strain Melo63 16S ribosomal RNA gene, partial sequence	Alphaproteobacteria	H3QVG8203GVP7P	Otu555	2	0	2	0	0	0	0	0	0	0	0	0	0	0	0	0	0	0	0	0	0	0	0	0	0	0	0	2	0	0	0	0	0	0	0	0	0	0	0	0	0	0	0	0
Bacteria(100);Bacteroidetes(100);Bacteroidia(100);Bacteroidales(100);Bacteroidaceae(100);Bacteroides(100);unclassified;	AB666151	Uncultured bacterium gene for 16S ribosomal RNA, partial sequence, clone: D49	other	H3QVG8203FT7IN	Otu556	21	0	21	0	0	0	0	0	0	0	0	0	0	0	0	0	0	0	0	0	0	0	0	0	0	0	0	17	0	0	4	0	0	0	0	0	0	0	0	0	0	0	0	0
Bacteria(100);Proteobacteria(100);Betaproteobacteria(100);Burkholderiales(100);unclassified;unclassified;unclassified;	JX574895	Bacterium enrichment culture clone SC-2_73 16S ribosomal RNA gene, partial sequence	other	H3QVG8203FUH55	Otu557	18	0	15	0	1	1	1	0	0	0	0	0	0	0	0	0	0	0	0	0	0	0	0	0	0	1	3	6	0	2	0	0	0	3	0	0	1	0	0	0	0	0	0	0
Bacteria(100);Bacteroidetes(100);Flavobacteria(100);Flavobacteriales(100);Flavobacteriaceae(100);unclassified;unclassified;	JQ116280	Uncultured bacterium clone N1_3_10 16S ribosomal RNA gene, partial sequence	other	H3QVG8203GA244	Otu558	1	0	1	0	0	0	0	0	0	0	0	0	0	0	0	0	0	0	0	0	0	0	0	0	0	0	0	1	0	0	0	0	0	0	0	0	0	0	0	0	0	0	0	0
Bacteria(100);Proteobacteria(100);Betaproteobacteria(100);unclassified;unclassified;unclassified;unclassified;	GU791103	Uncultured bacterium clone Atl_32 16S ribosomal RNA gene, partial sequence	other	H3QVG8203FMQT2	Otu559	1	0	1	0	0	0	0	0	0	0	0	0	0	0	0	0	0	0	0	0	0	0	0	0	0	0	0	1	0	0	0	0	0	0	0	0	0	0	0	0	0	0	0	0
Bacteria(100);Firmicutes(100);Clostridia(100);Clostridiales(100);Clostridiaceae(96);unclassified;unclassified;	KF026317	Uncultured bacterium clone EMC-0124 16S ribosomal RNA gene, partial sequence	Firmicutes	H3QVG8203FTGTO	Otu560	4	0	4	0	0	0	0	0	0	0	0	0	0	0	0	0	0	0	0	0	0	0	0	0	0	0	3	1	0	0	0	0	0	0	0	0	0	0	0	0	0	0	0	0
Bacteria(100);Firmicutes(100);Bacilli(100);Bacillales(100);unclassified;unclassified;unclassified;	KC502885	Uncultured bacterium clone PB1-9 16S ribosomal RNA gene, partial sequence	Firmicutes	H3QVG8203GLQVJ	Otu561	1	0	1	0	0	0	0	0	0	0	0	0	0	0	0	0	0	0	0	0	0	0	0	0	0	0	0	1	0	0	0	0	0	0	0	0	0	0	0	0	0	0	0	0
Bacteria(100);Firmicutes(100);Clostridia(100);Clostridiales(100);Lachnospiraceae(100);unclassified;unclassified;	JX641139	Uncultured bacterium clone HBYTM9302HAJ3W 16S ribosomal RNA gene, partial sequence	Firmicutes	H3QVG8203HDRZM	Otu562	23	0	23	0	0	0	0	0	0	0	0	0	0	0	0	0	0	0	0	0	0	0	0	0	0	0	0	23	0	0	0	0	0	0	0	0	0	0	0	0	0	0	0	0
Bacteria(100);Proteobacteria(100);Alphaproteobacteria(100);Rhizobiales(100);Methylobacteriaceae(98);Methylobacterium(98);Methylobacterium_adhaesivum(95);	KC607332	Uncultured bacterium clone bacBiof_1827 16S ribosomal RNA gene, partial sequence	Alphaproteobacteria	H3QVG8203HELL4	Otu563	6	0	5	0	0	0	1	0	0	0	0	0	0	0	0	0	0	0	0	0	0	0	1	0	0	0	0	1	3	0	0	0	0	0	0	0	0	0	0	0	0	0	0	0
Bacteria(100);Actinobacteria(100);Actinobacteria(100);Actinomycetales(100);Nocardiopsaceae(96);Nocardiopsis(96);unclassified(91);	KC710971	Nocardiopsis alba strain Nellore 16S ribosomal RNA gene, partial sequence	Actinomycetales	H3QVG8203G46N4	Otu564	17	0	17	0	0	0	0	0	0	0	0	0	0	0	0	0	0	0	0	0	0	0	0	0	0	0	4	10	0	0	3	0	0	0	0	0	0	0	0	0	0	0	0	0
Bacteria(100);Bacteroidetes(100);Flavobacteria(98);Flavobacteriales(98);Flavobacteriaceae(97);unclassified;unclassified;	JX637009	Uncultured bacterium clone HBYTM9301DBCDN 16S ribosomal RNA gene, partial sequence	other	H3QVG8203F48LB	Otu565	6	0	6	0	0	0	0	0	0	0	0	0	0	0	0	0	0	0	0	0	0	0	0	0	0	0	0	6	0	0	0	0	0	0	0	0	0	0	0	0	0	0	0	0
Bacteria(100);Bacteroidetes(100);Flavobacteria(100);Flavobacteriales(100);Flavobacteriaceae(100);Salinimicrobium(100);unclassified(100);	KC493234	Salinimicrobium sp. JNU-L062 16S ribosomal RNA gene, partial sequence	other	H3QVG8203FWUXM	Otu566	4	0	3	0	1	0	0	0	0	0	0	0	0	0	0	0	0	0	0	0	0	0	0	0	0	0	0	1	2	0	0	0	0	0	0	0	0	0	0	0	0	0	0	0
Bacteria(100);Proteobacteria(100);Gammaproteobacteria(100);Xanthomonadales(100);Xanthomonadaceae(100);unclassified;unclassified;	JX637523	Uncultured bacterium clone HA3ER6P01EHL9L 16S ribosomal RNA gene, partial sequence	Gammaproteobacteria	H3QVG8203FL9BG	Otu567	1	0	1	0	0	0	0	0	0	0	0	0	0	0	0	0	0	0	0	0	0	0	0	0	0	0	0	1	0	0	0	0	0	0	0	0	0	0	0	0	0	0	0	0
Bacteria(100);Actinobacteria(100);Actinobacteria(100);Actinomycetales(100);Nocardioidaceae(100);Nocardioides(99);Nocardioides_albus(99);	KC554098	Uncultured bacterium clone 1-279 16S ribosomal RNA gene, partial sequence	Actinomycetales	H3QVG8203FV5I6	Otu568	1	0	1	0	0	0	0	0	0	0	0	0	0	0	0	0	0	0	0	0	0	0	0	0	0	0	0	1	0	0	0	0	0	0	0	0	0	0	0	0	0	0	0	0
Bacteria(100);Bacteroidetes(100);Sphingobacteria(97);Sphingobacteriales(97);Sphingobacteriaceae(90);unclassified;unclassified;	FJ675486	Uncultured bacterium clone LL141-8G18 16S ribosomal RNA gene, partial sequence	other	H3QVG8203FT60O	Otu569	1	0	1	0	0	0	0	0	0	0	0	0	0	0	0	0	0	0	0	0	0	0	0	0	0	0	0	1	0	0	0	0	0	0	0	0	0	0	0	0	0	0	0	0
Bacteria(100);Bacteroidetes(100);Bacteroidia(100);Bacteroidales(100);unclassified;unclassified;unclassified;	GU222202	Uncultured Bacteroides sp. clone CGOF37 16S ribosomal RNA gene, partial sequence	other	H3QVG8203G00GB	Otu570	1	0	1	0	0	0	0	0	0	0	0	0	0	0	0	0	0	0	0	0	0	0	0	0	0	0	0	1	0	0	0	0	0	0	0	0	0	0	0	0	0	0	0	0
Bacteria(100);Bacteroidetes(100);Bacteroidia(99);Bacteroidales(99);Bacteroidaceae(92);Bacteroides(92);unclassified;	AB666114	Uncultured bacterium gene for 16S ribosomal RNA, partial sequence, clone: C38	other	H3QVG8203FZXC9	Otu571	5	0	5	0	0	0	0	0	0	0	0	0	0	0	0	0	0	0	0	0	0	0	0	0	0	0	0	5	0	0	0	0	0	0	0	0	0	0	0	0	0	0	0	0
Bacteria(100);Bacteroidetes(100);Flavobacteria(100);Flavobacteriales(100);Flavobacteriaceae(100);Chryseobacterium(100);unclassified;	KC734347	Bacterium W46 16S ribosomal RNA gene, partial sequence	other	H3QVG8203F56I6	Otu572	1	0	1	0	0	0	0	0	0	0	0	0	0	0	0	0	0	0	0	0	0	0	0	0	0	0	0	1	0	0	0	0	0	0	0	0	0	0	0	0	0	0	0	0
Bacteria(100);Actinobacteria(100);Actinobacteria(100);Actinomycetales(100);unclassified;unclassified;unclassified;	KC442593	Uncultured actinobacterium clone 3F4 16S ribosomal RNA gene, partial sequence	Actinomycetales	H3QVG8203F7WBT	Otu573	1	0	1	0	0	0	0	0	0	0	0	0	0	0	0	0	0	0	0	0	0	0	0	0	0	0	0	1	0	0	0	0	0	0	0	0	0	0	0	0	0	0	0	0
Bacteria(100);Bacteroidetes(100);Flavobacteria(99);Flavobacteriales(99);Flavobacteriaceae(99);unclassified;unclassified;	HF938074	Uncultured bacterium partial 16S rRNA gene, clone 31567-ATB-AH	other	H3QVG8203GN3VT	Otu574	1	0	1	0	0	0	0	0	0	0	0	0	0	0	0	0	0	0	0	0	0	0	0	0	0	0	0	1	0	0	0	0	0	0	0	0	0	0	0	0	0	0	0	0
Bacteria(100);TM7(100);TM7-1(91);unclassified(91);unclassified(91);unclassified(91);unclassified(91);	HQ500667	Uncultured bacterium clone Pohang_WWTP_August.2006_3525 16S ribosomal RNA gene, partial sequence	other	H3QVG8203G2BEJ	Otu575	1	0	1	0	0	0	0	0	0	0	0	0	0	0	0	0	0	0	0	0	0	0	0	0	0	0	0	1	0	0	0	0	0	0	0	0	0	0	0	0	0	0	0	0
Bacteria(100);Actinobacteria(100);Actinobacteria(100);Actinomycetales(100);Nocardioidaceae(97);Aeromicrobium(97);unclassified(97);	KC554258	Uncultured bacterium clone 5-600 16S ribosomal RNA gene, partial sequence	Actinomycetales	H3QVG8203FSZ9Z	Otu576	1	0	1	0	0	0	0	0	0	0	0	0	0	0	0	0	0	0	0	0	0	0	0	0	0	0	0	1	0	0	0	0	0	0	0	0	0	0	0	0	0	0	0	0
Bacteria(100);Bacteroidetes(100);Sphingobacteria(100);Sphingobacteriales(100);unclassified;unclassified;unclassified;	JF127628	Uncultured bacterium clone ncd1500b02c1 16S ribosomal RNA gene, partial sequence	other	H3QVG8203GOFYD	Otu577	7	0	7	0	0	0	0	0	0	0	0	0	0	0	0	0	0	0	0	0	0	0	0	0	0	0	0	1	0	0	0	0	6	0	0	0	0	0	0	0	0	0	0	0
Bacteria(100);Actinobacteria(100);Actinobacteria(100);Actinomycetales(100);unclassified;unclassified;unclassified;	HQ523703	Uncultured bacterium clone Pohang_WWTP_April.2007_3267 16S ribosomal RNA gene, partial sequence	Actinomycetales	H3QVG8203F4L44	Otu578	1	0	1	0	0	0	0	0	0	0	0	0	0	0	0	0	0	0	0	0	0	0	0	0	0	0	0	1	0	0	0	0	0	0	0	0	0	0	0	0	0	0	0	0
Bacteria(100);Firmicutes(100);Bacilli(100);Bacillales(100);Planococcaceae(96);Sporosarcina(84);unclassified;	JX640461	Uncultured bacterium clone HA3ER6P01BQTWZ 16S ribosomal RNA gene, partial sequence	Firmicutes	H3QVG8203GFU25	Otu579	1	0	1	0	0	0	0	0	0	0	0	0	0	0	0	0	0	0	0	0	0	0	0	0	0	0	0	1	0	0	0	0	0	0	0	0	0	0	0	0	0	0	0	0
Bacteria(100);Firmicutes(100);Bacilli(100);Lactobacillales(100);Carnobacteriaceae(100);Trichococcus(85);unclassified;	KC701556	Uncultured bacterium clone S58 16S ribosomal RNA gene, partial sequence	other	H3QVG8203HGYGG	Otu580	2	0	2	0	0	0	0	0	0	0	0	0	0	0	0	0	0	0	0	0	0	0	0	0	0	0	0	2	0	0	0	0	0	0	0	0	0	0	0	0	0	0	0	0
Bacteria(100);Firmicutes(100);Clostridia(100);Clostridiales(100);Ruminococcaceae(100);Oscillospira(95);unclassified(95);	JX548155	Uncultured bacterium clone 12m1515223 16S ribosomal RNA gene, partial sequence	Firmicutes	H3QVG8203G59DV	Otu581	1	0	1	0	0	0	0	0	0	0	0	0	0	0	0	0	0	0	0	0	0	0	0	0	0	0	0	1	0	0	0	0	0	0	0	0	0	0	0	0	0	0	0	0
Bacteria(100);Proteobacteria(100);Gammaproteobacteria(100);Oceanospirillales(100);Halomonadaceae(100);Halomonas(99);unclassified;	KC005304	Salinicola sp. DY22 16S ribosomal RNA gene, partial sequence	Gammaproteobacteria	H3QVG8203G3M2P	Otu582	19	0	19	0	0	0	0	0	0	0	0	0	0	0	0	0	0	0	0	0	0	0	1	0	0	0	8	1	5	0	0	0	1	3	0	0	0	0	0	0	0	0	0	0
Bacteria(100);Actinobacteria(100);Actinobacteria(100);Actinomycetales(100);Promicromonosporaceae(95);unclassified;unclassified;	KF040988	Promicromonospora citrea strain CE73 16S ribosomal RNA gene, partial sequence	Actinomycetales	H3QVG8203GN330	Otu583	3	0	3	0	0	0	0	0	0	0	0	0	0	0	0	0	0	0	0	0	0	0	0	0	0	0	2	1	0	0	0	0	0	0	0	0	0	0	0	0	0	0	0	0
Bacteria(100);Proteobacteria(100);Alphaproteobacteria(100);Rhizobiales(83);unclassified;unclassified;unclassified;	HM729668	Uncultured bacterium clone GB7N87004IFS27 small subunit ribosomal RNA gene, partial sequence	Alphaproteobacteria	H3QVG8203GXN1X	Otu584	1	0	1	0	0	0	0	0	0	0	0	0	0	0	0	0	0	0	0	0	0	0	0	0	0	0	0	1	0	0	0	0	0	0	0	0	0	0	0	0	0	0	0	0
Bacteria(100);Bacteroidetes(100);Bacteroidia(100);Bacteroidales(100);Bacteroidaceae(90);Bacteroides(90);unclassified;	KC468147	Uncultured Bacteroides sp. clone MO395_D10 16S ribosomal RNA gene, partial sequence	other	H3QVG8203GE2JV	Otu585	1	0	1	0	0	0	0	0	0	0	0	0	0	0	0	0	0	0	0	0	0	0	0	0	0	0	0	1	0	0	0	0	0	0	0	0	0	0	0	0	0	0	0	0
Bacteria(100);Proteobacteria(100);Alphaproteobacteria(100);Rhizobiales(100);unclassified;unclassified;unclassified;	JX635512	Uncultured bacterium clone HBYTM9301BW3IV 16S ribosomal RNA gene, partial sequence	Alphaproteobacteria	H3QVG8203F0GD4	Otu586	3	0	3	0	0	0	0	0	0	0	0	0	0	0	0	0	0	0	0	0	0	0	0	0	0	0	2	1	0	0	0	0	0	0	0	0	0	0	0	0	0	0	0	0
Bacteria(100);Firmicutes(100);Bacilli(100);Bacillales(100);Bacillaceae_2(80);unclassified;unclassified;	NR_042445	Paucisalibacillus globulus strain : B22 16S ribosomal RNA, partial sequence	Firmicutes	H3QVG8203HGHRB	Otu587	1	0	1	0	0	0	0	0	0	0	0	0	0	0	0	0	0	0	0	0	0	0	0	0	0	0	0	1	0	0	0	0	0	0	0	0	0	0	0	0	0	0	0	0
Bacteria(100);Bacteroidetes(100);Bacteroidia(100);Bacteroidales(100);Rikenellaceae(100);Alistipes(100);unclassified(100);	JN076253	Uncultured bacterium clone HC08_FZZ71GH02BYRXQ 16S ribosomal RNA gene, partial sequence	other	H3QVG8203GO1SJ	Otu588	5	0	5	0	0	0	0	0	0	0	0	0	0	0	0	0	0	0	0	0	0	0	0	0	0	0	0	5	0	0	0	0	0	0	0	0	0	0	0	0	0	0	0	0
Bacteria(100);Firmicutes(100);Clostridia(100);Clostridiales(100);unclassified;unclassified;unclassified;	HM635209	Proteiniborus sp. enrichment culture clone WSC-29 16S ribosomal RNA gene, partial sequence	Firmicutes	H3QVG8203GNU1L	Otu589	1	0	1	0	0	0	0	0	0	0	0	0	0	0	0	0	0	0	0	0	0	0	0	0	0	0	0	1	0	0	0	0	0	0	0	0	0	0	0	0	0	0	0	0
Bacteria(100);Bacteroidetes(100);Sphingobacteria(99);Sphingobacteriales(99);Cyclobacteriaceae(95);unclassified(92);unclassified(92);	FJ671714	Uncultured bacterium clone Ll142-1K1 16S ribosomal RNA gene, partial sequence	other	H3QVG8203G3GJT	Otu590	1	0	1	0	0	0	0	0	0	0	0	0	0	0	0	0	0	0	0	0	0	0	0	0	0	0	0	1	0	0	0	0	0	0	0	0	0	0	0	0	0	0	0	0
Bacteria(100);Bacteroidetes(100);Flavobacteria(100);Flavobacteriales(100);Flavobacteriaceae(100);unclassified;unclassified;	JQ374762	Uncultured bacterium clone NT42c5_21276 16S ribosomal RNA gene, partial sequence	other	H3QVG8203GAMOE	Otu591	1	0	1	0	0	0	0	0	0	0	0	0	0	0	0	0	0	0	0	0	0	0	0	0	0	0	0	1	0	0	0	0	0	0	0	0	0	0	0	0	0	0	0	0
Bacteria(100);Actinobacteria(100);Actinobacteria(100);Actinomycetales(100);Microbacteriaceae(94);Leucobacter(86);unclassified(85);	KC788087	Leucobacter alluvii strain D41 ZL-15 16S ribosomal RNA gene, partial sequence	Actinomycetales	H3QVG8203FW2R6	Otu592	2	0	2	0	0	0	0	0	0	0	0	0	0	0	0	0	0	0	0	0	0	0	0	0	0	0	0	2	0	0	0	0	0	0	0	0	0	0	0	0	0	0	0	0
Bacteria(100);Proteobacteria(100);Alphaproteobacteria(100);Rhodobacterales(98);Rhodobacteraceae(98);unclassified;unclassified;	HM238142	Uncultured alpha proteobacterium clone FF_168 16S ribosomal RNA gene, partial sequence	Alphaproteobacteria	H3QVG8203F6XMI	Otu593	1	0	1	0	0	0	0	0	0	0	0	0	0	0	0	0	0	0	0	0	0	0	0	0	0	0	0	1	0	0	0	0	0	0	0	0	0	0	0	0	0	0	0	0
Bacteria(100);Proteobacteria(100);Gammaproteobacteria(100);Enterobacteriales(98);Enterobacteriaceae(98);unclassified;unclassified;	HM825301	Uncultured bacterium clone nby426e11c1 16S ribosomal RNA gene, partial sequence	Enterobacteriaceae	H3QVG8203FURHE	Otu594	1	0	1	0	0	0	0	0	0	0	0	0	0	0	0	0	0	0	0	0	0	0	0	0	0	0	0	1	0	0	0	0	0	0	0	0	0	0	0	0	0	0	0	0
Bacteria(100);Tenericutes(100);Erysipelotrichi(100);Erysipelotrichales(100);Erysipelotrichaceae(100);Bulleidia(100);p-1630-c5(100);	JQ186779	Uncultured bacterium clone BD08617 16S ribosomal RNA gene, partial sequence	other	H3QVG8203HIZ9E	Otu595	1	0	1	0	0	0	0	0	0	0	0	0	0	0	0	0	0	0	0	0	0	0	0	0	0	0	0	1	0	0	0	0	0	0	0	0	0	0	0	0	0	0	0	0
Bacteria(100);Proteobacteria(100);Alphaproteobacteria(100);Rhodobacterales(99);Rhodobacteraceae(99);unclassified;unclassified;	KC322947	Uncultured bacterium clone SBB1_331 16S ribosomal RNA gene, partial sequence	Alphaproteobacteria	H3QVG8203GU0DM	Otu596	8	0	6	0	2	0	0	0	0	0	0	0	0	0	0	0	0	0	0	0	0	0	0	0	0	0	2	1	0	3	0	0	0	0	0	0	0	0	0	2	0	0	0	0
Bacteria(100);Bacteroidetes(100);Flavobacteria(98);Flavobacteriales(98);Flavobacteriaceae(98);unclassified;unclassified;	HQ445842	Uncultured bacterium clone Luq_GN490_057 16S ribosomal RNA gene, partial sequence	other	H3QVG8203FQ9GN	Otu597	1	0	1	0	0	0	0	0	0	0	0	0	0	0	0	0	0	0	0	0	0	0	0	0	0	0	0	1	0	0	0	0	0	0	0	0	0	0	0	0	0	0	0	0
Bacteria(100);Bacteroidetes(100);Sphingobacteria(100);Sphingobacteriales(100);Sphingobacteriaceae(99);Sphingobacterium(98);unclassified(94);	KC009698	Sphingobacterium sp. GR16 16S ribosomal RNA gene, partial sequence	other	H3QVG8203FMEKW	Otu598	1	0	1	0	0	0	0	0	0	0	0	0	0	0	0	0	0	0	0	0	0	0	0	0	0	0	0	1	0	0	0	0	0	0	0	0	0	0	0	0	0	0	0	0
Bacteria(100);Proteobacteria(100);Betaproteobacteria(100);Burkholderiales(83);unclassified;unclassified;unclassified;	KF037843	Uncultured bacterium clone YF605 16S ribosomal RNA gene, partial sequence	other	H3QVG8203G4IG5	Otu599	14	0	14	0	0	0	0	0	0	0	0	0	0	0	0	0	0	0	0	0	0	0	0	0	0	0	0	7	0	0	0	0	7	0	0	0	0	0	0	0	0	0	0	0
Bacteria(100);Firmicutes(100);Bacilli(100);Bacillales(99);unclassified;unclassified;unclassified;	JX133529	Uncultured bacterium clone LG77 16S ribosomal RNA gene, partial sequence	Firmicutes	H3QVG8203GWR9G	Otu600	1	0	1	0	0	0	0	0	0	0	0	0	0	0	0	0	0	0	0	0	0	0	0	0	0	0	0	1	0	0	0	0	0	0	0	0	0	0	0	0	0	0	0	0
Bacteria(100);Actinobacteria(100);Actinobacteria(100);Actinomycetales(100);Nocardioidaceae(92);Nocardioides(90);unclassified;	JQ378050	Uncultured bacterium clone NT03d9_20530 16S ribosomal RNA gene, partial sequence	Actinomycetales	H3QVG8203GDQSF	Otu601	1	0	1	0	0	0	0	0	0	0	0	0	0	0	0	0	0	0	0	0	0	0	0	0	0	0	0	1	0	0	0	0	0	0	0	0	0	0	0	0	0	0	0	0
Bacteria(100);Actinobacteria(100);Actinobacteria(100);Actinomycetales(100);unclassified;unclassified;unclassified;	JF185749	Uncultured bacterium clone ncd2161d06c1 16S ribosomal RNA gene, partial sequence	Actinomycetales	H3QVG8203FP31B	Otu602	3	0	3	0	0	0	0	0	0	0	0	0	0	0	0	0	0	0	0	0	0	0	0	0	0	0	0	1	0	0	2	0	0	0	0	0	0	0	0	0	0	0	0	0
Bacteria(100);Tenericutes(100);Mollicutes(100);Entomoplasmatales(100);Spiroplasmataceae(100);Spiroplasma(100);Spiroplasma_sp.(96);	KC424775	Uncultured bacterium clone 2-43 16S ribosomal RNA gene, partial sequence	other	H3QVG8203GCBP5	Otu603	105	0	105	0	0	0	0	0	0	0	0	0	0	0	0	0	0	0	0	0	0	0	0	0	0	0	0	0	105	0	0	0	0	0	0	0	0	0	0	0	0	0	0	0
Bacteria(100);Proteobacteria(100);Betaproteobacteria(100);Burkholderiales(100);Comamonadaceae(97);Comamonas(96);unclassified(96);	KC734175	Bacterium 14W314 16S ribosomal RNA gene, partial sequence	other	H3QVG8203GMBH8	Otu604	15	0	15	0	0	0	0	0	0	0	0	0	0	0	0	0	0	0	0	0	0	0	0	0	0	0	0	0	15	0	0	0	0	0	0	0	0	0	0	0	0	0	0	0
Bacteria(100);Proteobacteria(100);Alphaproteobacteria(100);Sphingomonadales(100);Sphingomonadaceae(100);Sphingobium(99);unclassified(98);	KC971288	Uncultured bacterium clone BSNS2833 16S ribosomal RNA gene, partial sequence	Alphaproteobacteria	H3QVG8203F6KTC	Otu605	7	0	7	0	0	0	0	0	0	0	0	0	0	0	0	0	0	0	0	0	0	0	0	0	0	0	0	0	7	0	0	0	0	0	0	0	0	0	0	0	0	0	0	0
Bacteria(100);Proteobacteria(100);Gammaproteobacteria(100);Enterobacteriales(99);Enterobacteriaceae(99);unclassified;unclassified;	GU592764	Candidatus Serratia symbiotica isolate KoGrPit clone 16c2 16S ribosomal RNA gene, partial sequence	Enterobacteriaceae	H3QVG8203G1OVY	Otu606	6	0	6	0	0	0	0	0	0	0	0	0	0	0	0	0	0	0	0	0	0	0	0	0	0	0	0	0	6	0	0	0	0	0	0	0	0	0	0	0	0	0	0	0
Bacteria(100);Armatimonadetes(100);Armatimonadia(99);Armatimonadales(99);Armatimonadaceae(99);unclassified(98);unclassified(98);	JQ379671	Uncultured bacterium clone NTS001Fastb11_11857 16S ribosomal RNA gene, partial sequence	other	H3QVG8203G7POD	Otu607	5	0	5	0	0	0	0	0	0	0	0	0	0	0	0	0	0	0	0	0	0	0	0	0	0	0	0	0	5	0	0	0	0	0	0	0	0	0	0	0	0	0	0	0
Bacteria(100);Proteobacteria(100);Alphaproteobacteria(100);Rhizobiales(100);unclassified;unclassified;unclassified;	JQ402797	Uncultured Rhizobiales bacterium clone CNY_03262 16S ribosomal RNA gene, partial sequence	Alphaproteobacteria	H3QVG8203F5K96	Otu608	9	0	4	0	1	3	1	0	0	0	0	0	0	0	0	0	0	0	0	0	0	0	0	0	0	0	0	0	4	0	0	0	0	0	0	1	0	0	0	0	0	0	0	0
Bacteria(100);Proteobacteria(100);Deltaproteobacteria(100);MIZ46(100);unclassified(100);unclassified(100);unclassified(100);	JX099978	Uncultured bacterium clone HLLCs228 16S ribosomal RNA gene, partial sequence	other	H3QVG8203GENF8	Otu609	6	0	5	0	1	0	0	0	0	0	0	0	0	0	0	0	0	0	0	0	0	0	0	0	0	0	0	0	3	0	0	0	2	0	0	0	0	0	0	0	0	1	0	0
Bacteria(100);Proteobacteria(100);Alphaproteobacteria(100);Rhizobiales(100);Methylobacteriaceae(94);Methylobacterium(94);unclassified;	NR_074205	Methylobacterium nodulans ORS 2060 strain ORS 2060 16S ribosomal RNA, complete sequence	Alphaproteobacteria	H3QVG8203F9HRQ	Otu610	7	0	7	0	0	0	0	0	0	0	0	0	0	0	0	0	0	0	0	0	0	0	0	0	0	0	3	0	4	0	0	0	0	0	0	0	0	0	0	0	0	0	0	0
Bacteria(100);Proteobacteria(100);Betaproteobacteria(100);Neisseriales(95);Neisseriaceae(95);Stenoxybacter(80);unclassified;	EF212927	Stenoxybacter acetivorans strain TAM-FC5 16S ribosomal RNA gene, partial sequence	other	H3QVG8203F7FSE	Otu611	3	0	3	0	0	0	0	0	0	0	0	0	0	0	0	0	0	0	0	0	0	0	0	0	0	0	0	0	3	0	0	0	0	0	0	0	0	0	0	0	0	0	0	0
Bacteria(100);Bacteroidetes(100);Sphingobacteria(100);Sphingobacteriales(100);Sphingobacteriaceae(100);Pedobacter(92);unclassified(92);	JX100206	Uncultured bacterium clone HLLHb344 16S ribosomal RNA gene, partial sequence	other	H3QVG8203F9CO2	Otu612	4	0	4	0	0	0	0	0	0	0	0	0	0	0	0	0	0	0	0	0	0	0	0	0	0	0	0	0	4	0	0	0	0	0	0	0	0	0	0	0	0	0	0	0
Bacteria(100);Proteobacteria(100);Betaproteobacteria(99);Burkholderiales(90);unclassified;unclassified;unclassified;	EF650974	Uncultured Rubrivivax sp. clone AUVE_02E07 16S ribosomal RNA gene, partial sequence	other	H3QVG8203GKBEE	Otu613	4	0	4	0	0	0	0	0	0	0	0	0	0	0	0	0	0	0	0	0	0	0	1	0	0	0	0	0	3	0	0	0	0	0	0	0	0	0	0	0	0	0	0	0
Bacteria(100);Bacteroidetes(100);Sphingobacteria(100);Sphingobacteriales(100);Chitinophagaceae(100);unclassified;unclassified;	JQ400778	Uncultured Flavisolibacter sp. clone CNY_00673 16S ribosomal RNA gene, partial sequence	other	H3QVG8203FRZ2U	Otu614	3	0	2	0	1	0	0	0	0	0	0	0	0	0	0	0	0	0	0	0	0	0	0	0	0	0	0	0	2	0	0	0	0	0	0	0	0	0	0	1	0	0	0	0
Bacteria(100);Proteobacteria(100);Alphaproteobacteria(100);Sphingomonadales(100);Sphingomonadaceae(100);unclassified;unclassified;	KC606870	Uncultured bacterium clone CarbonSeq11a_030410_G02 16S ribosomal RNA gene, partial sequence	Alphaproteobacteria	H3QVG8203FWF46	Otu615	13	0	13	0	0	0	0	0	0	0	0	0	0	0	0	0	0	0	0	0	0	0	0	0	0	0	0	0	11	0	0	0	2	0	0	0	0	0	0	0	0	0	0	0
Bacteria(100);Bacteroidetes(100);Flavobacteria(100);Flavobacteriales(100);Flavobacteriaceae(96);unclassified;unclassified;	KC432449	Uncultured bacterium clone SEAC1CH091 16S ribosomal RNA gene, partial sequence	other	H3QVG8203GD7OY	Otu616	2	0	2	0	0	0	0	0	0	0	0	0	0	0	0	0	0	0	0	0	0	0	0	0	0	0	0	0	2	0	0	0	0	0	0	0	0	0	0	0	0	0	0	0
Bacteria(100);Actinobacteria(100);Actinobacteria(100);Actinomycetales(100);Pseudonocardiaceae(89);Pseudonocardia(89);unclassified(88);	KC606890	Uncultured bacterium clone CSbiofilm_10_040210_C01 16S ribosomal RNA gene, partial sequence	Actinomycetales	H3QVG8203F57VZ	Otu617	5	0	5	0	0	0	0	0	0	0	0	0	0	0	0	0	0	0	0	0	0	0	0	0	0	0	1	0	2	0	1	0	1	0	0	0	0	0	0	0	0	0	0	0
Bacteria(100);Proteobacteria(100);Alphaproteobacteria(100);Sphingomonadales(94);Sphingomonadaceae(94);Sphingomonas(90);Sphingomonas_wittichii(90);	KC448729	Uncultured alpha proteobacterium clone RLBp3259 16S ribosomal RNA gene, partial sequence	Alphaproteobacteria	H3QVG8203FOQ62	Otu618	17	0	17	0	0	0	0	0	0	0	0	0	0	0	0	0	0	0	0	0	0	0	0	0	0	0	0	0	17	0	0	0	0	0	0	0	0	0	0	0	0	0	0	0
Bacteria(100);Proteobacteria(100);Betaproteobacteria(87);unclassified;unclassified;unclassified;unclassified;	JX559116	Uncultured Methylobacillus sp. clone R4-39 16S ribosomal RNA gene, partial sequence	other	H3QVG8203GRQHI	Otu619	2	0	2	0	0	0	0	0	0	0	0	0	0	0	0	0	0	0	0	0	0	0	0	0	0	0	0	0	2	0	0	0	0	0	0	0	0	0	0	0	0	0	0	0
Bacteria(100);Proteobacteria(100);Alphaproteobacteria(100);Rhizobiales(100);unclassified;unclassified;unclassified;	KC540970	Uncultured bacterium clone RS-A018 16S ribosomal RNA gene, partial sequence	Alphaproteobacteria	H3QVG8203GY7WD	Otu620	8	0	8	0	0	0	0	0	0	0	0	0	0	0	0	0	0	0	0	0	0	0	0	0	0	0	0	2	6	0	0	0	0	0	0	0	0	0	0	0	0	0	0	0
Bacteria(100);Firmicutes(100);Bacilli(100);Bacillales(100);unclassified;unclassified;unclassified;	KC918294	Uncultured Bacillaceae bacterium clone 20G-e1 16S ribosomal RNA gene, partial sequence	Firmicutes	H3QVG8203F3J29	Otu621	4	0	3	0	0	1	0	0	0	0	0	0	0	0	0	0	0	0	0	0	0	0	1	0	0	0	0	0	2	0	0	0	0	0	0	0	0	0	0	0	0	0	0	0
Bacteria(100);Actinobacteria(100);Actinobacteria(100);Actinomycetales(100);unclassified;unclassified;unclassified;	JF217402	Uncultured bacterium clone ncd2526f10c1 16S ribosomal RNA gene, partial sequence	Actinomycetales	H3QVG8203GS91G	Otu622	2	0	1	0	1	0	0	0	0	0	0	0	0	0	0	0	0	0	0	0	0	0	0	0	0	0	0	0	1	0	0	0	0	0	0	0	0	0	0	0	0	0	0	1
Bacteria(100);Proteobacteria(100);Alphaproteobacteria(100);Alphaproteobacteria_order_incertae_sedis(99);Alphaproteobacteria_family_incertae_sedis(99);Geminicoccus(99);unclassified;	KC011156	Uncultured alpha proteobacterium clone bsc57 16S ribosomal RNA gene, partial sequence	Alphaproteobacteria	H3QVG8203GKV13	Otu623	3	0	3	0	0	0	0	0	0	0	0	0	0	0	0	0	0	0	0	0	0	0	0	0	0	0	0	0	3	0	0	0	0	0	0	0	0	0	0	0	0	0	0	0
Bacteria(100);Actinobacteria(100);Actinobacteria(100);Actinomycetales(100);Actinopolysporaceae(94);unclassified(94);unclassified(94);	GQ263558	Uncultured bacterium clone FW3_110C 16S ribosomal RNA gene, partial sequence	Actinomycetales	H3QVG8203F87UV	Otu624	1	0	1	0	0	0	0	0	0	0	0	0	0	0	0	0	0	0	0	0	0	0	0	0	0	0	0	0	1	0	0	0	0	0	0	0	0	0	0	0	0	0	0	0
Bacteria(100);Firmicutes(100);Clostridia(100);Clostridiales(100);Lachnospiraceae(99);unclassified;unclassified;	AB781611	Uncultured Lachnospiraceae bacterium gene for 16S ribosomal RNA, partial sequence, clone: A13	Firmicutes	H3QVG8203GAWVD	Otu625	1	0	1	0	0	0	0	0	0	0	0	0	0	0	0	0	0	0	0	0	0	0	0	0	0	0	0	0	1	0	0	0	0	0	0	0	0	0	0	0	0	0	0	0
Bacteria(100);Actinobacteria(100);Actinobacteria(100);Actinomycetales(100);Micromonosporaceae(88);unclassified;unclassified;	KC256230	Micromonosporaceae bacterium ISO888_OTU2305 16S ribosomal RNA gene, partial sequence	Actinomycetales	H3QVG8203GXQG1	Otu626	1	0	1	0	0	0	0	0	0	0	0	0	0	0	0	0	0	0	0	0	0	0	0	0	0	0	0	0	1	0	0	0	0	0	0	0	0	0	0	0	0	0	0	0
Bacteria(100);Actinobacteria(100);Actinobacteria(100);Actinomycetales(97);unclassified;unclassified;unclassified;	.	.	Actinomycetales	H3QVG8203FUVRD	Otu627	9	0	8	0	0	0	1	0	0	0	0	0	0	0	0	0	0	0	0	0	0	0	0	0	0	0	0	0	2	0	2	2	2	0	0	0	0	0	0	0	0	0	0	0
Bacteria(100);TM7(100);TM7_class_incertae_sedis(84);TM7_order_incertae_sedis(84);TM7_family_incertae_sedis(84);TM7_genus_incertae_sedis(84);unclassified;	JX633686	Uncultured bacterium clone G8XQE6O04I7ZMT 16S ribosomal RNA gene, partial sequence	other	H3QVG8203GXTT8	Otu628	2	0	2	0	0	0	0	0	0	0	0	0	0	0	0	0	0	0	0	0	0	0	0	0	0	0	0	0	2	0	0	0	0	0	0	0	0	0	0	0	0	0	0	0
Bacteria(100);Actinobacteria(100);Actinobacteria(100);Actinomycetales(100);Micromonosporaceae(100);Actinoplanes(86);unclassified;	JF096924	Uncultured bacterium clone ncd1315h07c1 16S ribosomal RNA gene, partial sequence	Actinomycetales	H3QVG8203GNEWQ	Otu629	1	0	1	0	0	0	0	0	0	0	0	0	0	0	0	0	0	0	0	0	0	0	0	0	0	0	0	0	1	0	0	0	0	0	0	0	0	0	0	0	0	0	0	0
Bacteria(100);Proteobacteria(100);Betaproteobacteria(99);Neisseriales(99);Neisseriaceae(99);unclassified;unclassified;	KC896745	Uncultured Neisseriaceae bacterium clone AMP_C2535-15 16S ribosomal RNA gene, partial sequence	other	H3QVG8203FK5ZH	Otu630	1	0	1	0	0	0	0	0	0	0	0	0	0	0	0	0	0	0	0	0	0	0	0	0	0	0	0	0	1	0	0	0	0	0	0	0	0	0	0	0	0	0	0	0
Bacteria(100);Bacteroidetes(100);Sphingobacteria(100);Sphingobacteriales(100);Sphingobacteriaceae(100);Parapedobacter(100);unclassified(100);	JQ337747	Uncultured bacterium clone OT-1-C2 16S ribosomal RNA gene, partial sequence	other	H3QVG8203FMBOD	Otu631	5	0	5	0	0	0	0	0	0	0	0	0	0	0	0	0	0	0	0	0	0	0	0	0	0	0	0	3	2	0	0	0	0	0	0	0	0	0	0	0	0	0	0	0
Bacteria(100);Firmicutes(100);Bacilli(99);Lactobacillales(99);Leuconostocaceae(99);Fructobacillus(99);unclassified(99);	DQ837629	Uncultured firmicute clone HBG_D2V2-1 16S ribosomal RNA gene, partial sequence	other	H3QVG8203F82CO	Otu632	3	0	3	0	0	0	0	0	0	0	0	0	0	0	0	0	0	0	0	0	0	0	0	2	0	0	0	0	1	0	0	0	0	0	0	0	0	0	0	0	0	0	0	0
Bacteria(100);Actinobacteria(100);Actinobacteria(100);Actinomycetales(100);Nocardioidaceae(96);unclassified;unclassified;	KC554900	Uncultured bacterium clone D2-450. 16S ribosomal RNA gene, partial sequence	Actinomycetales	H3QVG8203F96CG	Otu633	1	0	1	0	0	0	0	0	0	0	0	0	0	0	0	0	0	0	0	0	0	0	0	0	0	0	0	0	1	0	0	0	0	0	0	0	0	0	0	0	0	0	0	0
Bacteria(100);Bacteroidetes(100);Sphingobacteria(99);Sphingobacteriales(99);Chitinophagaceae(99);Segetibacter(98);unclassified(98);	JQ400876	Uncultured Segetibacter sp. clone CNY_00804 16S ribosomal RNA gene, partial sequence	other	H3QVG8203FM9VR	Otu634	4	0	4	0	0	0	0	0	0	0	0	0	0	0	0	0	0	0	0	0	0	0	0	0	0	3	0	0	1	0	0	0	0	0	0	0	0	0	0	0	0	0	0	0
Bacteria(100);Actinobacteria(100);Actinobacteria(100);Actinomycetales(100);unclassified;unclassified;unclassified;	DQ517179	Bacterium SL5.38 16S ribosomal RNA gene, partial sequence	Actinomycetales	H3QVG8203GYO6P	Otu635	1	0	1	0	0	0	0	0	0	0	0	0	0	0	0	0	0	0	0	0	0	0	0	0	0	0	0	0	1	0	0	0	0	0	0	0	0	0	0	0	0	0	0	0
Bacteria(100);Proteobacteria(100);Epsilonproteobacteria(100);Campylobacterales(100);Campylobacteraceae(100);Campylobacter(100);unclassified;	KF040443	Campylobacter sp. 706H 16S ribosomal RNA gene, partial sequence	other	H3QVG8203HEHZQ	Otu636	1	0	1	0	0	0	0	0	0	0	0	0	0	0	0	0	0	0	0	0	0	0	0	0	0	0	0	0	1	0	0	0	0	0	0	0	0	0	0	0	0	0	0	0
Bacteria(100);Chloroflexi(100);Anaerolineae(97);Anaerolineales(97);Anaerolinaceae(97);CFB-26(96);unclassified(96);	JQ167595	Uncultured bacterium clone S2_3_1911 16S ribosomal RNA gene, partial sequence	other	H3QVG8203G1Y1G	Otu637	7	0	7	0	0	0	0	0	0	0	0	0	0	0	0	0	0	0	0	0	0	0	0	0	0	0	0	0	0	7	0	0	0	0	0	0	0	0	0	0	0	0	0	0
Bacteria(100);Actinobacteria(100);Actinobacteria(100);Actinomycetales(100);unclassified;unclassified;unclassified;	FJ671584	Uncultured bacterium clone LL143-8L9 16S ribosomal RNA gene, partial sequence	Actinomycetales	H3QVG8203F0SJN	Otu638	4	0	4	0	0	0	0	0	0	0	0	0	0	0	0	0	0	0	0	0	0	0	0	0	0	0	0	0	0	4	0	0	0	0	0	0	0	0	0	0	0	0	0	0
Bacteria(100);Bacteroidetes(100);Bacteroidia(100);Bacteroidales(100);Rikenellaceae(100);Alistipes(100);unclassified(96);	JN553467	Uncultured bacterium clone JT7_FX9YN3P16JXMFF 16S ribosomal RNA gene, partial sequence	other	H3QVG8203G9YM5	Otu639	3	0	3	0	0	0	0	0	0	0	0	0	0	0	0	0	0	0	0	0	0	0	0	0	0	0	0	0	0	3	0	0	0	0	0	0	0	0	0	0	0	0	0	0
Bacteria(100);Bacteroidetes(100);Flavobacteria(100);Flavobacteriales(100);Flavobacteriaceae(100);Chryseobacterium(97);unclassified;	KC244336	Chryseobacterium vrystaatense strain 6-1-prima 16S ribosomal RNA gene, partial sequence	other	H3QVG8203G1Y9T	Otu640	2	0	2	0	0	0	0	0	0	0	0	0	0	0	0	0	0	0	0	0	0	0	0	0	0	0	0	0	0	2	0	0	0	0	0	0	0	0	0	0	0	0	0	0
Bacteria(100);Actinobacteria(100);Actinobacteria(100);MC47(99);unclassified(99);unclassified(99);unclassified(99);	HM789654	Uncultured bacterium clone AK1197_12588 16S ribosomal RNA gene, partial sequence	other	H3QVG8203FN5JT	Otu641	2	0	2	0	0	0	0	0	0	0	0	0	0	0	0	0	0	0	0	0	0	0	0	0	0	0	0	0	0	2	0	0	0	0	0	0	0	0	0	0	0	0	0	0
Bacteria(100);Proteobacteria(100);Betaproteobacteria(100);unclassified;unclassified;unclassified;unclassified;	KC701577	Uncultured bacterium clone D103 16S ribosomal RNA gene, partial sequence	other	H3QVG8203G0JN5	Otu642	1	0	1	0	0	0	0	0	0	0	0	0	0	0	0	0	0	0	0	0	0	0	0	0	0	0	0	0	0	1	0	0	0	0	0	0	0	0	0	0	0	0	0	0
Bacteria(100);Actinobacteria(100);Actinobacteria(100);Actinomycetales(100);Actinomycetaceae(100);Actinomyces(100);Actinomyces_sp._oral_taxon_848(100);	JX171198	Uncultured Actinomycetaceae bacterium clone BA112 16S ribosomal RNA gene, partial sequence	Actinomycetales	H3QVG8203F0XPG	Otu643	1	0	1	0	0	0	0	0	0	0	0	0	0	0	0	0	0	0	0	0	0	0	0	0	0	0	0	0	0	1	0	0	0	0	0	0	0	0	0	0	0	0	0	0
Bacteria(100);Armatimonadetes(100);Armatimonadia(100);Armatimonadales(100);Armatimonadaceae(100);unclassified(99);unclassified(99);	JQ401144	Uncultured soil bacterium clone CNY_01133 16S ribosomal RNA gene, partial sequence	other	H3QVG8203GQ9WW	Otu644	1	0	1	0	0	0	0	0	0	0	0	0	0	0	0	0	0	0	0	0	0	0	0	0	0	0	0	0	0	1	0	0	0	0	0	0	0	0	0	0	0	0	0	0
Bacteria(100);Proteobacteria(100);Gammaproteobacteria(100);Pseudomonadales(92);Moraxellaceae(83);Acinetobacter(82);unclassified;	JN904060	Uncultured bacterium clone GG07CDB91 16S ribosomal RNA gene, partial sequence	Gammaproteobacteria	H3QVG8203HANQF	Otu645	5	0	5	0	0	0	0	0	0	0	0	0	0	0	0	0	0	0	0	0	0	0	0	4	0	0	0	0	0	1	0	0	0	0	0	0	0	0	0	0	0	0	0	0
Bacteria(100);Proteobacteria(100);Alphaproteobacteria(100);Rhodobacterales(100);Rhodobacteraceae(100);Rhodobacter(85);unclassified(85);	KC972272	Uncultured bacterium clone BSNS1704 16S ribosomal RNA gene, partial sequence	Alphaproteobacteria	H3QVG8203F50W4	Otu646	1	0	1	0	0	0	0	0	0	0	0	0	0	0	0	0	0	0	0	0	0	0	0	0	0	0	0	0	0	1	0	0	0	0	0	0	0	0	0	0	0	0	0	0
Bacteria(100);Actinobacteria(100);Actinobacteria(100);Actinomycetales(100);unclassified;unclassified;unclassified;	HM330582	Uncultured bacterium clone ncd952a02c1 16S ribosomal RNA gene, partial sequence	Actinomycetales	H3QVG8203G1UUF	Otu647	4	0	4	0	0	0	0	0	0	0	0	0	0	0	0	0	0	0	0	0	0	0	0	0	0	0	0	1	0	1	0	0	2	0	0	0	0	0	0	0	0	0	0	0
Bacteria(100);Proteobacteria(100);Alphaproteobacteria(99);Rhizobiales(98);unclassified;unclassified;unclassified;	KC286879	Uncultured bacterium clone gls168 16S ribosomal RNA gene, partial sequence	Alphaproteobacteria	H3QVG8203GLS9B	Otu648	2	0	2	0	0	0	0	0	0	0	0	0	0	0	0	0	0	0	0	0	0	0	0	0	0	0	0	0	0	1	0	0	1	0	0	0	0	0	0	0	0	0	0	0
Bacteria(100);Proteobacteria(100);Betaproteobacteria(94);unclassified;unclassified;unclassified;unclassified;	JQ700690	Uncultured Schlegelella sp. clone C1_42 16S ribosomal RNA gene, partial sequence	other	H3QVG8203G6GBS	Otu649	2	0	2	0	0	0	0	0	0	0	0	0	0	0	0	0	0	0	0	0	0	0	0	0	0	0	0	1	0	1	0	0	0	0	0	0	0	0	0	0	0	0	0	0
Bacteria(100);Actinobacteria(100);Actinobacteria(100);koll13(87);unclassified(87);unclassified(87);unclassified(87);	JX240986	Uncultured actinobacterium clone ONGS190 16S ribosomal RNA gene, partial sequence	other	H3QVG8203GPE5Z	Otu650	2	0	2	0	0	0	0	0	0	0	0	0	0	0	0	0	0	0	0	0	0	0	0	0	0	0	0	0	0	1	0	0	1	0	0	0	0	0	0	0	0	0	0	0
Bacteria(100);Actinobacteria(100);Actinobacteria(100);Actinomycetales(100);Nocardioidaceae(100);Nocardioides(93);unclassified;	JX633966	Uncultured bacterium clone G8XQE6O04IFL8D 16S ribosomal RNA gene, partial sequence	Actinomycetales	H3QVG8203F7E95	Otu651	16	0	15	0	0	0	1	0	0	0	0	0	0	0	0	0	0	0	0	0	0	0	0	0	0	3	4	1	2	1	3	0	0	0	1	0	0	0	0	0	0	0	0	0
Bacteria(100);Actinobacteria(100);Actinobacteria(100);Actinomycetales(100);Nocardioidaceae(100);Pimelobacter(86);unclassified;	KC252735	Pimelobacter sp. N062 16S ribosomal RNA gene, partial sequence	Actinomycetales	H3QVG8203GISPY	Otu652	1	0	1	0	0	0	0	0	0	0	0	0	0	0	0	0	0	0	0	0	0	0	0	0	0	0	0	0	0	1	0	0	0	0	0	0	0	0	0	0	0	0	0	0
Bacteria(100);Actinobacteria(100);Actinobacteria(100);Actinomycetales(100);Microbacteriaceae(97);unclassified;unclassified;	KC708573	Curtobacterium oceanosedimentum strain Y27 16S ribosomal RNA gene, complete sequence	Actinomycetales	H3QVG8203GLDSN	Otu653	11	0	11	0	0	0	0	0	0	0	0	0	0	0	0	0	0	0	0	0	0	0	0	0	0	0	0	3	0	5	2	1	0	0	0	0	0	0	0	0	0	0	0	0
Bacteria(100);Bacteroidetes(100);Flavobacteria(87);Flavobacteriales(87);Flavobacteriaceae(82);unclassified;unclassified;	JX633345	Uncultured bacterium clone G8XQE6O04H7P3O 16S ribosomal RNA gene, partial sequence	other	H3QVG8203GJKV1	Otu654	1	0	1	0	0	0	0	0	0	0	0	0	0	0	0	0	0	0	0	0	0	0	0	0	0	0	0	0	0	1	0	0	0	0	0	0	0	0	0	0	0	0	0	0
Bacteria(100);Firmicutes(100);Bacilli(100);unclassified;unclassified;unclassified;unclassified;	KC953869	Exiguobacterium sp. GLY-2109 16S ribosomal RNA gene, partial sequence	Firmicutes	H3QVG8203HCB63	Otu655	8	0	8	0	0	0	0	0	0	0	0	0	0	0	0	0	0	0	0	0	0	0	0	0	0	0	0	0	0	0	8	0	0	0	0	0	0	0	0	0	0	0	0	0
Bacteria(100);Bacteroidetes(100);Sphingobacteria(100);Sphingobacteriales(100);Cytophagaceae(92);Hymenobacter(92);unclassified;	JQ376201	Uncultured bacterium clone NT54e8_21091 16S ribosomal RNA gene, partial sequence	other	H3QVG8203F0A9N	Otu656	7	0	5	0	2	0	0	0	0	0	0	0	0	0	0	0	0	0	0	0	0	0	0	0	0	0	0	0	0	0	5	0	0	0	0	0	0	0	0	1	0	0	0	1
Bacteria(100);Bacteroidetes(100);Sphingobacteria(93);Sphingobacteriales(93);unclassified;unclassified;unclassified;	GQ421850	Adhaeribacter aerophilus strain 6424S-25 16S ribosomal RNA gene, partial sequence	other	H3QVG8203GPKTJ	Otu657	14	0	14	0	0	0	0	0	0	0	0	0	0	0	0	0	0	0	0	0	0	0	0	0	0	0	10	0	0	0	4	0	0	0	0	0	0	0	0	0	0	0	0	0
Bacteria(100);Bacteroidetes(100);Sphingobacteria(100);Sphingobacteriales(100);unclassified;unclassified;unclassified;	DQ847449	Uncultured Flexibacteraceae bacterium clone LR2-77 16S ribosomal RNA gene, partial sequence	other	H3QVG8203GOC7K	Otu658	3	0	3	0	0	0	0	0	0	0	0	0	0	0	0	0	0	0	0	0	0	0	0	0	0	0	0	0	0	0	3	0	0	0	0	0	0	0	0	0	0	0	0	0
Bacteria(100);Bacteroidetes(100);Sphingobacteria(100);Sphingobacteriales(100);Flexibacteraceae(96);Hymenobacter(96);unclassified(96);	JF179023	Uncultured bacterium clone ncd2084g10c1 16S ribosomal RNA gene, partial sequence	other	H3QVG8203G5O73	Otu659	4	0	4	0	0	0	0	0	0	0	0	0	0	0	0	0	0	0	0	0	0	0	0	0	0	0	0	0	0	0	4	0	0	0	0	0	0	0	0	0	0	0	0	0
Bacteria(100);Proteobacteria(100);Alphaproteobacteria(100);Rhizobiales(95);unclassified;unclassified;unclassified;	JX523156	Uncultured Rhizobium sp. clone O8 16S ribosomal RNA gene, partial sequence	Alphaproteobacteria	H3QVG8203F0PF5	Otu660	2	0	2	0	0	0	0	0	0	0	0	0	0	0	0	0	0	0	0	0	0	0	0	0	0	0	0	0	0	0	2	0	0	0	0	0	0	0	0	0	0	0	0	0
Bacteria(100);Actinobacteria(100);Actinobacteria(100);Actinomycetales(100);Micromonosporaceae(100);unclassified;unclassified;	KC554739	Uncultured bacterium clone A1-140. 16S ribosomal RNA gene, partial sequence	Actinomycetales	H3QVG8203F62S2	Otu661	2	0	2	0	0	0	0	0	0	0	0	0	0	0	0	0	0	0	0	0	0	0	0	0	0	0	0	0	0	0	2	0	0	0	0	0	0	0	0	0	0	0	0	0
Bacteria(100);Firmicutes(100);Clostridia(100);Clostridiales(100);unclassified;unclassified;unclassified;	JQ187130	Uncultured bacterium clone BD10701 16S ribosomal RNA gene, partial sequence	Firmicutes	H3QVG8203GHN48	Otu662	9	0	9	0	0	0	0	0	0	0	0	0	0	0	0	0	0	0	0	0	0	0	0	0	0	0	0	0	0	0	7	0	2	0	0	0	0	0	0	0	0	0	0	0
Bacteria(100);Firmicutes(100);Bacilli(96);Bacillales(96);Paenibacillaceae(91);Ammoniphilus(91);unclassified(91);	JF832331	Uncultured Ammoniphilus sp. clone MS5sf-16 16S ribosomal RNA gene, partial sequence	Firmicutes	H3QVG8203F959A	Otu663	7	0	5	0	2	0	0	0	0	0	0	0	0	0	0	0	0	0	0	0	0	0	0	0	0	4	0	0	0	0	1	0	0	0	0	0	0	0	0	0	0	0	0	0
Bacteria(100);Actinobacteria(100);Actinobacteria(99);Actinomycetales(99);unclassified;unclassified;unclassified;	HM297891	Uncultured bacterium clone ncd858b02c1 16S ribosomal RNA gene, partial sequence	Actinomycetales	H3QVG8203HBQ0O	Otu664	2	0	2	0	0	0	0	0	0	0	0	0	0	0	0	0	0	0	0	0	0	0	0	0	0	0	0	0	0	0	2	0	0	0	0	0	0	0	0	0	0	0	0	0
Bacteria(100);Bacteroidetes(100);Sphingobacteria(100);Sphingobacteriales(100);Chitinophagaceae(100);Segetibacter(100);unclassified(100);	JQ400881	Uncultured Segetibacter sp. clone CNY_00810 16S ribosomal RNA gene, partial sequence	other	H3QVG8203HCQMO	Otu665	1	0	1	0	0	0	0	0	0	0	0	0	0	0	0	0	0	0	0	0	0	0	0	0	0	0	0	0	0	0	1	0	0	0	0	0	0	0	0	0	0	0	0	0
Bacteria(100);Actinobacteria(100);Actinobacteria(100);koll13(96);unclassified(96);unclassified(96);unclassified(96);	FR871572	Uncultured bacterium partial 16S rRNA gene, clone Baren07SC43	other	H3QVG8203G15QE	Otu666	1	0	1	0	0	0	0	0	0	0	0	0	0	0	0	0	0	0	0	0	0	0	0	0	0	0	0	0	0	0	1	0	0	0	0	0	0	0	0	0	0	0	0	0
Bacteria(100);Proteobacteria(100);Alphaproteobacteria(100);Rhizobiales(100);Rhodobiaceae(95);unclassified(95);unclassified(95);	KC447879	Uncultured alpha proteobacterium clone RLBp342 16S ribosomal RNA gene, partial sequence	Alphaproteobacteria	H3QVG8203GGUQ1	Otu667	1	0	1	0	0	0	0	0	0	0	0	0	0	0	0	0	0	0	0	0	0	0	0	0	0	0	0	0	0	0	1	0	0	0	0	0	0	0	0	0	0	0	0	0
Bacteria(100);Actinobacteria(100);Actinobacteria(100);Solirubrobacterales(100);Conexibacteraceae(92);unclassified(92);unclassified(92);	JQ400458	Uncultured Solirubrobacterales bacterium clone CNY_00316 16S ribosomal RNA gene, partial sequence	other	H3QVG8203G7K2N	Otu668	2	0	2	0	0	0	0	0	0	0	0	0	0	0	0	0	0	0	0	0	0	0	0	0	0	0	0	0	0	0	2	0	0	0	0	0	0	0	0	0	0	0	0	0
Bacteria(100);Actinobacteria(100);Actinobacteria(100);Euzebiales(100);Euzebiaceae(100);unclassified(100);unclassified(100);	JN178778	Uncultured bacterium clone TX2_8E11 16S ribosomal RNA gene, partial sequence	other	H3QVG8203GACYH	Otu669	1	0	1	0	0	0	0	0	0	0	0	0	0	0	0	0	0	0	0	0	0	0	0	0	0	0	0	0	0	0	1	0	0	0	0	0	0	0	0	0	0	0	0	0
Bacteria(100);Actinobacteria(100);Actinobacteria(100);Actinomycetales(100);Micromonosporaceae(95);unclassified;unclassified;	FJ478825	Uncultured bacterium clone p7i15ok 16S ribosomal RNA gene, partial sequence	Actinomycetales	H3QVG8203GPNJJ	Otu670	1	0	1	0	0	0	0	0	0	0	0	0	0	0	0	0	0	0	0	0	0	0	0	0	0	0	0	0	0	0	1	0	0	0	0	0	0	0	0	0	0	0	0	0
Bacteria(100);Proteobacteria(100);Alphaproteobacteria(99);Rhizobiales(97);unclassified;unclassified;unclassified;	JX635603	Uncultured bacterium clone HBYTM9301EFIFK 16S ribosomal RNA gene, partial sequence	Alphaproteobacteria	H3QVG8203G977V	Otu671	1	0	1	0	0	0	0	0	0	0	0	0	0	0	0	0	0	0	0	0	0	0	0	0	0	0	0	0	0	0	1	0	0	0	0	0	0	0	0	0	0	0	0	0
Bacteria(100);Proteobacteria(100);Alphaproteobacteria(100);Rhodobacterales(100);Rhodobacteraceae(100);unclassified;unclassified;	KC820799	Bacterium DW2-13 16S ribosomal RNA gene, partial sequence	Alphaproteobacteria	H3QVG8203GXZSI	Otu672	1	0	1	0	0	0	0	0	0	0	0	0	0	0	0	0	0	0	0	0	0	0	0	0	0	0	0	0	0	0	1	0	0	0	0	0	0	0	0	0	0	0	0	0
Bacteria(100);Proteobacteria(100);Gammaproteobacteria(100);Oceanospirillales(100);Halomonadaceae(100);Halomonas(99);unclassified(87);	KF021821	Halomonas sp. H-141 16S ribosomal RNA gene, partial sequence	Gammaproteobacteria	H3QVG8203GQ20V	Otu673	2	0	2	0	0	0	0	0	0	0	0	0	0	0	0	0	0	0	0	0	0	0	0	0	0	0	0	0	0	0	2	0	0	0	0	0	0	0	0	0	0	0	0	0
Bacteria(100);Bacteroidetes(100);Sphingobacteria(90);Sphingobacteriales(90);unclassified;unclassified;unclassified;	JQ374518	Uncultured bacterium clone MD15c6_12662 16S ribosomal RNA gene, partial sequence	other	H3QVG8203GURNP	Otu674	1	0	1	0	0	0	0	0	0	0	0	0	0	0	0	0	0	0	0	0	0	0	0	0	0	0	0	0	0	0	1	0	0	0	0	0	0	0	0	0	0	0	0	0
Bacteria(100);Actinobacteria(100);Actinobacteria(100);Rubrobacterales(100);Rubrobacteraceae(100);Rubrobacter(100);unclassified(99);	KC554456	Uncultured bacterium clone 9-108 16S ribosomal RNA gene, partial sequence	other	H3QVG8203GIDTK	Otu675	2	0	2	0	0	0	0	0	0	0	0	0	0	0	0	0	0	0	0	0	0	0	0	0	0	0	1	0	0	0	1	0	0	0	0	0	0	0	0	0	0	0	0	0
Bacteria(100);Proteobacteria(100);Alphaproteobacteria(100);unclassified;unclassified;unclassified;unclassified;	AB821160	Uncultured bacterium gene for 16S rRNA, partial sequence, clone: GJ16S2_E06	Alphaproteobacteria	H3QVG8203FW92D	Otu676	1	0	1	0	0	0	0	0	0	0	0	0	0	0	0	0	0	0	0	0	0	0	0	0	0	0	0	0	0	0	1	0	0	0	0	0	0	0	0	0	0	0	0	0
Bacteria(100);Firmicutes(100);Bacilli(100);Bacillales(100);Bacillaceae(88);unclassified;unclassified;	JQ400389	Uncultured Bacillus sp. clone CNY_00217 16S ribosomal RNA gene, partial sequence	Firmicutes	H3QVG8203GI9XF	Otu677	1	0	1	0	0	0	0	0	0	0	0	0	0	0	0	0	0	0	0	0	0	0	0	0	0	0	0	0	0	0	1	0	0	0	0	0	0	0	0	0	0	0	0	0
Bacteria(100);Proteobacteria(100);Alphaproteobacteria(100);Rhodospirillales(100);Acetobacteraceae(100);Roseomonas(100);unclassified(100);	EF682998	Uncultured proteobacterium clone F14_5H_FL 16S ribosomal RNA gene, partial sequence	Acetobacteraceae	H3QVG8203F1DFN	Otu678	1	0	1	0	0	0	0	0	0	0	0	0	0	0	0	0	0	0	0	0	0	0	0	0	0	0	0	0	0	0	1	0	0	0	0	0	0	0	0	0	0	0	0	0
Bacteria(100);Planctomycetes(100);Planctomycea(100);Gemmatales(100);Isosphaeraceae(100);unclassified(99);unclassified(99);	HQ487476	Uncultured bacterium clone Pohang_WWTP_April.2006_1256 16S ribosomal RNA gene, partial sequence	other	H3QVG8203G25JG	Otu679	1	0	1	0	0	0	0	0	0	0	0	0	0	0	0	0	0	0	0	0	0	0	0	0	0	0	0	0	0	0	1	0	0	0	0	0	0	0	0	0	0	0	0	0
Bacteria(100);Actinobacteria(100);Actinobacteria(100);Acidimicrobiales(100);unclassified;unclassified;unclassified;	KC594594	Uncultured bacterium clone LG03 16S ribosomal RNA gene, partial sequence	other	H3QVG8203G5EBV	Otu680	1	0	1	0	0	0	0	0	0	0	0	0	0	0	0	0	0	0	0	0	0	0	0	0	0	0	0	0	0	0	1	0	0	0	0	0	0	0	0	0	0	0	0	0
Bacteria(100);Actinobacteria(100);Actinobacteria(100);Rubrobacterales(100);Rubrobacteraceae(100);Rubrobacter(100);unclassified(89);	KF037527	Uncultured bacterium clone YZ708 16S ribosomal RNA gene, partial sequence	other	H3QVG8203F37HI	Otu681	1	0	1	0	0	0	0	0	0	0	0	0	0	0	0	0	0	0	0	0	0	0	0	0	0	0	0	0	0	0	1	0	0	0	0	0	0	0	0	0	0	0	0	0
Bacteria(100);Proteobacteria(100);Alphaproteobacteria(100);Rhodobacterales(99);Rhodobacteraceae(99);Rhodobacter(94);unclassified(94);	KC994704	Uncultured bacterium clone BF 024 16S ribosomal RNA gene, partial sequence	Alphaproteobacteria	H3QVG8203GUZ6O	Otu682	5	0	5	0	0	0	0	0	0	0	0	0	0	0	0	0	0	0	0	0	0	0	1	0	0	0	0	0	0	1	3	0	0	0	0	0	0	0	0	0	0	0	0	0
Bacteria(100);Proteobacteria(100);Betaproteobacteria(89);unclassified;unclassified;unclassified;unclassified;	.	.	other	H3QVG8203GP3UU	Otu683	8	0	8	0	0	0	0	0	0	0	0	0	0	0	0	0	0	0	0	0	0	0	0	0	0	0	7	0	0	0	1	0	0	0	0	0	0	0	0	0	0	0	0	0
Bacteria(100);Firmicutes(100);Bacilli(100);Bacillales(100);unclassified;unclassified;unclassified;	KC354687	Bacillus fumarioli strain C-ZJB-12-70 16S ribosomal RNA gene, partial sequence	Firmicutes	H3QVG8203F7IAZ	Otu684	3	0	3	0	0	0	0	0	0	0	0	0	0	0	0	0	0	0	0	0	0	0	0	0	0	0	0	0	0	0	0	3	0	0	0	0	0	0	0	0	0	0	0	0
Bacteria(100);Proteobacteria(100);Alphaproteobacteria(100);Sphingomonadales(100);Sphingomonadaceae(100);Novosphingobium(100);unclassified;	KC853222	Novosphingobium sp. W72 16S ribosomal RNA gene, partial sequence	Alphaproteobacteria	H3QVG8203GIEFG	Otu685	6	0	6	0	0	0	0	0	0	0	0	0	0	0	0	0	0	0	0	0	0	0	0	0	0	2	0	0	0	1	0	3	0	0	0	0	0	0	0	0	0	0	0	0
Bacteria(100);Proteobacteria(100);Gammaproteobacteria(100);Oceanospirillales(100);Halomonadaceae(94);Zymobacter(94);unclassified;	AB681768	Zymobacter palmae gene for 16S rRNA, partial sequence, strain: NBRC 102412	Gammaproteobacteria	H3QVG8203GV5XT	Otu686	14	0	8	0	6	0	0	0	0	0	0	0	0	0	0	0	0	0	0	0	0	0	0	1	0	0	1	0	5	0	0	1	0	0	0	0	0	0	0	4	0	0	0	2
Bacteria(100);Firmicutes(100);Bacilli(100);Exiguobacterales(100);Exiguobacteraceae(100);Exiguobacterium(100);unclassified;	KC917786	Uncultured Exiguobacterium sp. clone 20H-9 16S ribosomal RNA gene, partial sequence	Firmicutes	H3QVG8203FPVD0	Otu687	2	0	2	0	0	0	0	0	0	0	0	0	0	0	0	0	0	0	0	0	0	0	0	0	0	0	0	0	0	0	0	2	0	0	0	0	0	0	0	0	0	0	0	0
Bacteria(100);Proteobacteria(100);Gammaproteobacteria(100);Pasteurellales(100);Pasteurellaceae(100);Haemophilus(86);unclassified;	KC327660	Uncultured bacterium clone SPTFE1_140 16S ribosomal RNA gene, partial sequence	Gammaproteobacteria	H3QVG8203FU9P3	Otu688	12	0	12	0	0	0	0	0	0	0	0	0	0	0	0	0	0	0	0	0	0	0	0	0	0	0	0	0	0	0	0	0	12	0	0	0	0	0	0	0	0	0	0	0
Bacteria(100);TM7(100);TM7-3(100);unclassified;unclassified;unclassified;unclassified;	KC605619	Uncultured bacterium clone BAC6_1916 16S ribosomal RNA gene, partial sequence	other	H3QVG8203GLGMT	Otu689	6	0	5	0	0	0	1	0	0	0	0	0	0	0	0	0	0	0	0	0	0	0	0	0	0	0	0	0	0	0	0	0	5	0	0	0	0	0	0	0	0	0	0	0
Bacteria(100);Actinobacteria(100);Actinobacteria(100);Actinomycetales(100);unclassified;unclassified;unclassified;	JX965949	Promicromonospora citrea strain A065 16S ribosomal RNA gene, partial sequence	Actinomycetales	H3QVG8203GF1WQ	Otu690	4	0	4	0	0	0	0	0	0	0	0	0	0	0	0	0	0	0	0	0	0	0	0	0	0	0	0	0	0	0	0	0	4	0	0	0	0	0	0	0	0	0	0	0
Bacteria(100);Actinobacteria(100);Actinobacteria(100);Actinomycetales(100);Micromonosporaceae(95);unclassified;unclassified;	KC554907	Uncultured bacterium clone D2-15. 16S ribosomal RNA gene, partial sequence	Actinomycetales	H3QVG8203F1R6Z	Otu691	12	0	12	0	0	0	0	0	0	0	0	0	0	0	0	0	0	0	0	0	0	0	0	0	0	0	8	0	0	0	1	0	3	0	0	0	0	0	0	0	0	0	0	0
Bacteria(100);Actinobacteria(100);Actinobacteria(100);Actinomycetales(100);unclassified;unclassified;unclassified;	JX079295	Uncultured Actinomadura sp. clone BG2-42 16S ribosomal RNA gene, partial sequence	Actinomycetales	H3QVG8203F86LK	Otu692	3	0	3	0	0	0	0	0	0	0	0	0	0	0	0	0	0	0	0	0	0	0	0	0	0	0	0	0	0	0	0	0	3	0	0	0	0	0	0	0	0	0	0	0
Bacteria(100);Actinobacteria(100);Actinobacteria(100);Actinomycetales(100);Micromonosporaceae(100);Virgisporangium(89);Virgisporangium_ochraceum(89);	KC554572	Uncultured bacterium clone 10-987 16S ribosomal RNA gene, partial sequence	Actinomycetales	H3QVG8203HKGXK	Otu693	4	0	4	0	0	0	0	0	0	0	0	0	0	0	0	0	0	0	0	0	0	0	0	0	0	0	0	0	0	0	0	0	4	0	0	0	0	0	0	0	0	0	0	0
Bacteria(100);Firmicutes(100);Bacilli(100);Gemellales(100);Gemellaceae(100);Gemella(100);unclassified(100);	KC676159	Uncultured Gemella sp. clone 5H041 16S ribosomal RNA gene, partial sequence	Firmicutes	H3QVG8203FTFDX	Otu694	4	0	4	0	0	0	0	0	0	0	0	0	0	0	0	0	0	0	0	0	0	0	0	0	0	0	0	0	0	0	0	0	4	0	0	0	0	0	0	0	0	0	0	0
Bacteria(100);Proteobacteria(100);Gammaproteobacteria(100);Oceanospirillales(100);Alteromonadaceae(99);ND137(86);unclassified(86);	JN696039	Uncultured proteobacterium clone JJB3108 16S ribosomal RNA gene, partial sequence	Gammaproteobacteria	H3QVG8203G9YEG	Otu695	4	0	4	0	0	0	0	0	0	0	0	0	0	0	0	0	0	0	0	0	0	0	0	0	0	0	0	0	0	0	0	0	4	0	0	0	0	0	0	0	0	0	0	0
Bacteria(100);Fusobacteria(100);Fusobacteria(100);Fusobacteriales(100);Fusobacteriaceae(100);Streptobacillus(100);unclassified(100);	JN059039	Uncultured bacterium clone AI11_FZZ71GH05FY3CG 16S ribosomal RNA gene, partial sequence	other	H3QVG8203GHBRL	Otu696	6	0	6	0	0	0	0	0	0	0	0	0	0	0	0	0	0	0	0	0	0	0	0	0	0	0	0	0	0	0	0	0	6	0	0	0	0	0	0	0	0	0	0	0
Bacteria(100);Proteobacteria(100);Alphaproteobacteria(100);Rhizobiales(97);Rhizobiaceae(97);Agrobacterium(97);Agrobacterium_larrymoorei(96);	KC820064	Uncultured Agrobacterium sp. clone CK-Q13 16S ribosomal RNA gene, partial sequence	Alphaproteobacteria	H3QVG8203GY1TI	Otu697	2	0	2	0	0	0	0	0	0	0	0	0	0	0	0	0	0	0	0	0	0	0	0	0	0	0	0	0	0	0	0	0	2	0	0	0	0	0	0	0	0	0	0	0
Bacteria(100);Firmicutes(100);Bacilli(100);Bacillales(100);Bacillaceae(97);Oceanobacillus(94);unclassified(94);	AB695990	Uncultured bacterium gene for 16S rRNA, partial sequence, clone: 0502TCLN258	Firmicutes	H3QVG8203G36C2	Otu698	3	0	3	0	0	0	0	0	0	0	0	0	0	0	0	0	0	0	0	0	0	0	0	0	0	0	0	1	0	0	0	0	2	0	0	0	0	0	0	0	0	0	0	0
Bacteria(100);Nitrospirae(100);Nitrospira(100);Nitrospirales(100);Nitrospiraceae(100);Nitrospira(100);unclassified(100);	KC701565	Uncultured bacterium clone D45 16S ribosomal RNA gene, partial sequence	other	H3QVG8203GY2SR	Otu699	4	0	4	0	0	0	0	0	0	0	0	0	0	0	0	0	0	0	0	0	0	0	0	0	0	0	0	0	0	0	0	0	4	0	0	0	0	0	0	0	0	0	0	0
Bacteria(100);Acidobacteria(100);unclassified;unclassified;unclassified;unclassified;unclassified;	KC521857	Uncultured bacterium clone 2-6 16S ribosomal RNA gene, partial sequence	other	H3QVG8203G1CCO	Otu700	10	0	8	0	0	0	2	0	0	0	0	0	0	0	0	0	0	0	0	0	0	0	0	0	0	0	4	0	2	0	0	0	2	0	0	0	0	0	0	0	0	0	0	0
Bacteria(100);Actinobacteria(100);Actinobacteria(100);Actinomycetales(100);unclassified;unclassified;unclassified;	JQ353811	Cellulomonas terrae strain CGM-7 16S ribosomal RNA gene, partial sequence	Actinomycetales	H3QVG8203HEDQN	Otu701	2	0	2	0	0	0	0	0	0	0	0	0	0	0	0	0	0	0	0	0	0	0	0	0	0	0	0	0	0	0	0	0	2	0	0	0	0	0	0	0	0	0	0	0
Bacteria(100);Actinobacteria(100);Actinobacteria(100);Actinomycetales(100);Propionibacteriaceae(80);unclassified;unclassified;	KC447598	Uncultured actinobacterium clone RLBp2799 16S ribosomal RNA gene, partial sequence	Actinomycetales	H3QVG8203GRELP	Otu702	4	0	4	0	0	0	0	0	0	0	0	0	0	0	0	0	0	0	0	0	0	0	0	0	0	0	1	0	0	0	1	0	2	0	0	0	0	0	0	0	0	0	0	0
Bacteria(100);Bacteroidetes(100);Bacteroidia(100);Bacteroidales(100);RikenellaceaeII(100);unclassified(100);unclassified(100);	EU773038	Uncultured bacterium clone BG_aaa03d08.Contig1 16S ribosomal RNA gene, partial sequence	other	H3QVG8203HJBJS	Otu703	3	0	3	0	0	0	0	0	0	0	0	0	0	0	0	0	0	0	0	0	0	0	0	0	0	0	1	0	0	0	0	0	2	0	0	0	0	0	0	0	0	0	0	0
Bacteria(100);Proteobacteria(100);Alphaproteobacteria(100);Rhizobiales(100);unclassified;unclassified;unclassified;	JQ385587	Uncultured bacterium clone NTS002Powera1_6384 16S ribosomal RNA gene, partial sequence	Alphaproteobacteria	H3QVG8203GPSYK	Otu704	28	0	9	0	6	0	13	0	0	0	0	0	0	0	0	0	0	0	0	0	0	1	0	0	0	0	4	0	0	0	0	0	4	0	0	0	0	0	0	1	0	0	0	3
Bacteria(100);Proteobacteria(100);Betaproteobacteria(100);Burkholderiales(93);unclassified;unclassified;unclassified;	JX875887	Uncultured bacterium clone PAE-25 16S ribosomal RNA gene, partial sequence	other	H3QVG8203FXPB7	Otu705	2	0	2	0	0	0	0	0	0	0	0	0	0	0	0	0	0	0	0	0	0	0	0	0	0	0	0	0	0	0	0	0	2	0	0	0	0	0	0	0	0	0	0	0
Bacteria(100);Firmicutes(100);Bacilli(100);Lactobacillales(100);Streptococcaceae(100);Streptococcus(100);unclassified;	AB826497	Streptococcus sp. Str-122 gene for 16S ribosomal RNA, partial sequence	other	H3QVG8203F8P0S	Otu706	164	0	159	0	5	0	0	0	0	0	0	0	0	0	0	0	0	0	0	0	0	2	3	15	0	2	3	106	0	0	0	0	15	13	0	2	0	0	0	0	0	0	0	0
Bacteria(100);Proteobacteria(100);Gammaproteobacteria(99);Pseudomonadales(87);Pseudomonadaceae(83);unclassified;unclassified;	JQ772009	Uncultured Pseudomonadaceae bacterium clone CS53 16S ribosomal RNA gene, partial sequence	Gammaproteobacteria	H3QVG8203G81QF	Otu707	1	0	1	0	0	0	0	0	0	0	0	0	0	0	0	0	0	0	0	0	0	0	0	0	0	0	0	0	0	0	0	0	1	0	0	0	0	0	0	0	0	0	0	0
Bacteria(100);Actinobacteria(100);Actinobacteria(100);Actinomycetales(100);Micromonosporaceae(100);unclassified;unclassified;	KC554739	Uncultured bacterium clone A1-140. 16S ribosomal RNA gene, partial sequence	Actinomycetales	H3QVG8203G843K	Otu708	3	0	3	0	0	0	0	0	0	0	0	0	0	0	0	0	0	0	0	0	0	0	0	0	0	0	0	2	0	0	0	0	1	0	0	0	0	0	0	0	0	0	0	0
Bacteria(100);Bacteroidetes(100);Bacteroidia(100);Bacteroidales(100);Porphyromonadaceae(100);Porphyromonas(100);unclassified(100);	KC675922	Uncultured Porphyromonas sp. clone 5B087 16S ribosomal RNA gene, partial sequence	other	H3QVG8203F3C8D	Otu709	2	0	2	0	0	0	0	0	0	0	0	0	0	0	0	0	0	0	0	0	0	0	0	0	0	0	0	0	0	0	0	0	2	0	0	0	0	0	0	0	0	0	0	0
Bacteria(100);Firmicutes(100);Bacilli(100);Bacillales(100);unclassified;unclassified;unclassified;	HM583973	Oceanobacillus profundus strain CAIM 37 16S ribosomal RNA gene, partial sequence	Firmicutes	H3QVG8203FTJPG	Otu710	2	0	2	0	0	0	0	0	0	0	0	0	0	0	0	0	0	0	0	0	0	0	0	0	0	0	0	1	0	0	0	0	1	0	0	0	0	0	0	0	0	0	0	0
Bacteria(100);Proteobacteria(100);Alphaproteobacteria(100);Rhizobiales(100);Bradyrhizobiaceae(95);Salinarimonas(92);unclassified;	HQ697793	Uncultured bacterium clone Bms_CK297 16S ribosomal RNA gene, partial sequence	Alphaproteobacteria	H3QVG8203HKTPS	Otu711	2	0	2	0	0	0	0	0	0	0	0	0	0	0	0	0	0	0	0	0	0	0	0	0	0	0	0	0	0	0	0	0	2	0	0	0	0	0	0	0	0	0	0	0
Bacteria(100);Proteobacteria(100);Alphaproteobacteria(99);Rhizobiales(98);Methylocystaceae(94);unclassified;unclassified;	JQ387498	Uncultured bacterium clone NT42e4_14518 16S ribosomal RNA gene, partial sequence	Alphaproteobacteria	H3QVG8203HJSMM	Otu712	1	0	1	0	0	0	0	0	0	0	0	0	0	0	0	0	0	0	0	0	0	0	0	0	0	0	0	0	0	0	0	0	1	0	0	0	0	0	0	0	0	0	0	0
Bacteria(100);Actinobacteria(100);Actinobacteria(100);Actinomycetales(100);Intrasporangiaceae(82);unclassified;unclassified;	KC554718	Uncultured bacterium clone 11-980 16S ribosomal RNA gene, partial sequence	Actinomycetales	H3QVG8203FPJNA	Otu713	1	0	1	0	0	0	0	0	0	0	0	0	0	0	0	0	0	0	0	0	0	0	0	0	0	0	0	0	0	0	0	0	1	0	0	0	0	0	0	0	0	0	0	0
Bacteria(100);Proteobacteria(100);Alphaproteobacteria(99);Rhizobiales(98);unclassified;unclassified;unclassified;	KC904961	Shinella sp. C1 16S ribosomal RNA gene, partial sequence	Alphaproteobacteria	H3QVG8203GVTXD	Otu714	6	0	6	0	0	0	0	0	0	0	0	0	0	0	0	0	0	0	0	0	0	0	0	0	0	0	0	0	0	0	0	0	1	5	0	0	0	0	0	0	0	0	0	0
Bacteria(100);Actinobacteria(100);Actinobacteria(100);Actinomycetales(100);unclassified;unclassified;unclassified;	EF640631	Bacterium 24BK 16S ribosomal RNA gene, partial sequence	Actinomycetales	H3QVG8203GD6TC	Otu715	1	0	1	0	0	0	0	0	0	0	0	0	0	0	0	0	0	0	0	0	0	0	0	0	0	0	0	0	0	0	0	0	1	0	0	0	0	0	0	0	0	0	0	0
Bacteria(100);Proteobacteria(100);Alphaproteobacteria(100);Rhodobacterales(100);Rhodobacteraceae(100);unclassified;unclassified;	JX635593	Uncultured bacterium clone HBYTM9301CQG8C 16S ribosomal RNA gene, partial sequence	Alphaproteobacteria	H3QVG8203HJ2DQ	Otu716	1	0	1	0	0	0	0	0	0	0	0	0	0	0	0	0	0	0	0	0	0	0	0	0	0	0	0	0	0	0	0	0	1	0	0	0	0	0	0	0	0	0	0	0
Bacteria(100);Bacteroidetes(100);Sphingobacteria(97);Sphingobacteriales(97);Chitinophagaceae(97);Flavisolibacter(89);unclassified(89);	JX041842	Uncultured Bacteroidetes bacterium clone APC_4_G4 16S ribosomal RNA gene, partial sequence	other	H3QVG8203HIDKF	Otu717	10	0	10	0	0	0	0	0	0	0	0	0	0	0	0	0	0	0	0	0	0	0	0	0	0	3	1	0	0	0	0	0	6	0	0	0	0	0	0	0	0	0	0	0
Bacteria(100);Firmicutes(100);Clostridia(100);Clostridiales(100);unclassified;unclassified;unclassified;	JX640845	Uncultured bacterium clone HA3ER6P01DVVED 16S ribosomal RNA gene, partial sequence	Firmicutes	H3QVG8203GCN7B	Otu718	1	0	1	0	0	0	0	0	0	0	0	0	0	0	0	0	0	0	0	0	0	0	0	0	0	0	0	0	0	0	0	0	1	0	0	0	0	0	0	0	0	0	0	0
Bacteria(100);Actinobacteria(100);Actinobacteria(100);Actinomycetales(100);Nocardioidaceae(96);unclassified(90);unclassified(90);	JX636068	Uncultured bacterium clone HBYTM9302FJ5TA 16S ribosomal RNA gene, partial sequence	Actinomycetales	H3QVG8203HB0ZR	Otu719	9	0	9	0	0	0	0	0	0	0	0	0	0	0	0	0	0	0	0	0	0	0	2	0	0	0	3	2	0	0	0	0	1	1	0	0	0	0	0	0	0	0	0	0
Bacteria(100);Actinobacteria(100);Actinobacteria(100);Acidimicrobiales(100);Acidimicrobiaceae(100);Ilumatobacter(100);unclassified;	KC331229	Uncultured bacterium clone lp011 16S ribosomal RNA gene, partial sequence	other	H3QVG8203GF0NO	Otu720	1	0	1	0	0	0	0	0	0	0	0	0	0	0	0	0	0	0	0	0	0	0	0	0	0	0	0	0	0	0	0	0	1	0	0	0	0	0	0	0	0	0	0	0
Bacteria(100);Firmicutes(100);Bacilli(100);Bacillales(100);unclassified;unclassified;unclassified;	KC777211	Uncultured bacterium clone B7-2 16S ribosomal RNA gene, partial sequence	Firmicutes	H3QVG8203GV41N	Otu721	2	0	2	0	0	0	0	0	0	0	0	0	0	0	0	0	0	0	0	0	0	0	0	0	0	0	0	0	0	0	0	0	2	0	0	0	0	0	0	0	0	0	0	0
Bacteria(100);Actinobacteria(100);Actinobacteria(100);Acidimicrobiales(99);CL500-29(99);unclassified(99);unclassified(99);	KC554508	Uncultured bacterium clone 10-1239 16S ribosomal RNA gene, partial sequence	other	H3QVG8203GI2U0	Otu722	1	0	1	0	0	0	0	0	0	0	0	0	0	0	0	0	0	0	0	0	0	0	0	0	0	0	0	0	0	0	0	0	1	0	0	0	0	0	0	0	0	0	0	0
Bacteria(100);Bacteroidetes(100);Sphingobacteria(100);Sphingobacteriales(100);Chitinophagaceae(100);unclassified;unclassified;	HM038066	Uncultured bacterium clone JH-S44 16S ribosomal RNA gene, partial sequence	other	H3QVG8203HE1PS	Otu723	8	0	8	0	0	0	0	0	0	0	0	0	0	0	0	0	0	0	0	0	0	0	0	0	0	0	0	0	0	0	0	0	2	6	0	0	0	0	0	0	0	0	0	0
Bacteria(100);Firmicutes(100);unclassified;unclassified;unclassified;unclassified;unclassified;	EU779458	Uncultured bacterium clone GZ_aaa01f02 16S ribosomal RNA gene, partial sequence	Firmicutes	H3QVG8203HH7K1	Otu724	2	0	2	0	0	0	0	0	0	0	0	0	0	0	0	0	0	0	0	0	0	0	0	0	0	0	0	0	0	0	0	0	2	0	0	0	0	0	0	0	0	0	0	0
Bacteria(100);Bacteroidetes(100);Sphingobacteria(100);Sphingobacteriales(100);unclassified;unclassified;unclassified;	KC606883	Uncultured bacterium clone CarbonSeq09a_030410_C08 16S ribosomal RNA gene, partial sequence	other	H3QVG8203FWRB6	Otu725	4	0	4	0	0	0	0	0	0	0	0	0	0	0	0	0	0	0	0	0	0	0	0	0	0	0	0	0	0	0	0	2	2	0	0	0	0	0	0	0	0	0	0	0
Bacteria(100);Firmicutes(100);Bacilli(100);Bacillales(99);Bacillaceae(90);unclassified(85);unclassified(85);	FJ380157	Uncultured bacterium clone 9/4/5B 16S ribosomal RNA gene, partial sequence	Firmicutes	H3QVG8203HF8PU	Otu726	2	0	2	0	0	0	0	0	0	0	0	0	0	0	0	0	0	0	0	0	0	0	0	0	0	0	0	0	0	0	0	0	2	0	0	0	0	0	0	0	0	0	0	0
Bacteria(100);Firmicutes(100);Bacilli(100);Bacillales(100);unclassified;unclassified;unclassified;	JX225530	Uncultured bacterium clone EMIRGE_OTU_s8b4e_1076 16S ribosomal RNA gene, partial sequence	Firmicutes	H3QVG8203GPDC3	Otu727	3	0	3	0	0	0	0	0	0	0	0	0	0	0	0	0	0	0	0	0	0	0	0	0	0	0	0	0	0	0	0	0	3	0	0	0	0	0	0	0	0	0	0	0
Bacteria(100);Firmicutes(100);Clostridia(100);Clostridiales(100);Clostridiales_Family_XIII._Incertae_Sedis(96);unclassified;unclassified;	JX634748	Uncultured bacterium clone G8XQE6O04JAOID 16S ribosomal RNA gene, partial sequence	Firmicutes	H3QVG8203GEMS5	Otu728	1	0	1	0	0	0	0	0	0	0	0	0	0	0	0	0	0	0	0	0	0	0	0	0	0	0	0	0	0	0	0	0	1	0	0	0	0	0	0	0	0	0	0	0
Bacteria(100);Proteobacteria(100);Betaproteobacteria(96);Burkholderiales(88);Oxalobacteraceae(83);unclassified;unclassified;	AB769219	Herbaspirillum sp. UKPF19 gene for 16S rRNA, partial sequence	other	H3QVG8203F140O	Otu729	4	0	1	0	2	0	1	0	0	0	0	0	0	0	0	0	0	0	0	0	0	0	0	0	0	0	0	0	0	0	0	0	1	0	0	0	0	0	0	0	2	0	0	0
Bacteria(100);Firmicutes(100);Bacilli(100);Exiguobacterales(100);Exiguobacteraceae(100);Exiguobacterium(100);Exiguobacterium_aurantiacum(100);	KF021902	Exiguobacterium sp. H-256 16S ribosomal RNA gene, partial sequence	Firmicutes	H3QVG8203HF8CS	Otu730	3	0	3	0	0	0	0	0	0	0	0	0	0	0	0	0	0	0	0	0	0	0	0	0	0	0	2	0	0	0	0	0	1	0	0	0	0	0	0	0	0	0	0	0
Bacteria(100);Firmicutes(100);Clostridia(91);Clostridiales(91);Veillonellaceae(91);unclassified;unclassified;	JX640361	Uncultured bacterium clone HA3ER6P01A65RV 16S ribosomal RNA gene, partial sequence	Firmicutes	H3QVG8203GSNVJ	Otu731	1	0	1	0	0	0	0	0	0	0	0	0	0	0	0	0	0	0	0	0	0	0	0	0	0	0	0	0	0	0	0	0	1	0	0	0	0	0	0	0	0	0	0	0
Bacteria(100);Firmicutes(100);Bacilli(100);Bacillales(100);unclassified;unclassified;unclassified;	JN707726	Uncultured bacterium clone O373 16S ribosomal RNA gene, partial sequence	Firmicutes	H3QVG8203GGSQA	Otu732	1	0	1	0	0	0	0	0	0	0	0	0	0	0	0	0	0	0	0	0	0	0	0	0	0	0	0	0	0	0	0	0	1	0	0	0	0	0	0	0	0	0	0	0
Bacteria(100);Bacteroidetes(100);Bacteroidia(100);Bacteroidales(100);Prevotellaceae(99);Prevotella(99);Prevotella_nanceiensis(99);	JQ463088	Uncultured bacterium clone 070038_262 16S ribosomal RNA gene, partial sequence	other	H3QVG8203F3186	Otu733	2	0	2	0	0	0	0	0	0	0	0	0	0	0	0	0	0	0	0	0	0	0	0	0	0	0	0	0	0	0	0	0	2	0	0	0	0	0	0	0	0	0	0	0
Bacteria(100);Actinobacteria(100);Actinobacteria(100);Actinomycetales(100);Micrococcaceae(95);Kocuria(93);unclassified;	KC492511	Kocuria sp. BS10 16S ribosomal RNA gene, partial sequence	Actinomycetales	H3QVG8203G9AF4	Otu734	1	0	1	0	0	0	0	0	0	0	0	0	0	0	0	0	0	0	0	0	0	0	0	0	0	0	0	0	0	0	0	0	1	0	0	0	0	0	0	0	0	0	0	0
Bacteria(100);Proteobacteria(100);Betaproteobacteria(100);Rhodocyclales(92);unclassified(92);unclassified(92);unclassified(92);	KC432388	Uncultured bacterium clone SEAB1BE121 16S ribosomal RNA gene, partial sequence	other	H3QVG8203GGJ07	Otu735	1	0	1	0	0	0	0	0	0	0	0	0	0	0	0	0	0	0	0	0	0	0	0	0	0	0	0	0	0	0	0	0	1	0	0	0	0	0	0	0	0	0	0	0
Bacteria(100);Actinobacteria(100);Actinobacteria(100);Actinomycetales(100);Nocardioidaceae(99);unclassified;unclassified;	JF220788	Uncultured bacterium clone ncd2651h06c1 16S ribosomal RNA gene, partial sequence	Actinomycetales	H3QVG8203FVQL4	Otu736	1	0	1	0	0	0	0	0	0	0	0	0	0	0	0	0	0	0	0	0	0	0	0	0	0	0	0	0	0	0	0	0	1	0	0	0	0	0	0	0	0	0	0	0
Bacteria(100);Proteobacteria(100);Betaproteobacteria(100);Burkholderiales(100);Burkholderiaceae(100);Ralstonia(100);unclassified(100);	KF150478	Ralstonia insidiosa strain JN239 16S ribosomal RNA gene, partial sequence	other	H3QVG8203F9L9F	Otu737	30	0	27	0	2	1	0	0	0	0	0	0	0	0	0	0	0	0	0	0	0	0	1	0	0	0	0	0	6	0	0	0	0	20	0	0	0	0	0	0	2	0	0	0
Bacteria(100);Bacteroidetes(100);Sphingobacteria(99);Sphingobacteriales(99);Sphingobacteriaceae(98);Sphingobacterium(91);unclassified;	JQ186307	Uncultured bacterium clone BD07358 16S ribosomal RNA gene, partial sequence	other	H3QVG8203G6MM8	Otu738	22	0	22	0	0	0	0	0	0	0	0	0	0	0	0	0	0	0	0	0	0	0	0	0	0	0	5	8	0	0	0	0	0	9	0	0	0	0	0	0	0	0	0	0
Bacteria(100);Firmicutes(100);Clostridia(100);Clostridiales(100);Lachnospiraceae(99);unclassified;unclassified;	JX642749	Uncultured bacterium clone HBYTM9302FISXW 16S ribosomal RNA gene, partial sequence	Firmicutes	H3QVG8203GKJ7T	Otu739	13	0	13	0	0	0	0	0	0	0	0	0	0	0	0	0	0	0	0	0	0	0	0	0	0	0	3	0	0	0	0	0	0	10	0	0	0	0	0	0	0	0	0	0
Bacteria(100);Actinobacteria(100);Actinobacteria(100);Rubrobacterales(100);Rubrobacteraceae(100);Rubrobacter(100);unclassified(90);	JQ401288	Uncultured soil bacterium clone CNY_01308 16S ribosomal RNA gene, partial sequence	other	H3QVG8203GNKK1	Otu740	25	0	25	0	0	0	0	0	0	0	0	0	0	0	0	0	0	0	0	0	0	0	0	0	0	0	2	0	0	0	0	0	0	23	0	0	0	0	0	0	0	0	0	0
Bacteria(100);Actinobacteria(100);Actinobacteria(100);Actinomycetales(100);Microbacteriaceae(96);unclassified;unclassified;	KC853186	Microbacterium sp. W22 16S ribosomal RNA gene, partial sequence	Actinomycetales	H3QVG8203HCTPO	Otu741	8	0	8	0	0	0	0	0	0	0	0	0	0	0	0	0	0	0	0	0	0	0	0	0	0	0	0	2	0	0	0	0	0	6	0	0	0	0	0	0	0	0	0	0
Bacteria(100);Firmicutes(100);Bacilli(100);Bacillales(100);Bacillaceae(81);Bacillus(80);unclassified;	JX543771	Uncultured bacterium clone SeqID242 16S ribosomal RNA gene, partial sequence	Firmicutes	H3QVG8203F8O5G	Otu742	20	0	20	0	0	0	0	0	0	0	0	0	0	0	0	0	0	0	0	0	0	0	0	0	0	0	5	2	0	0	0	0	0	13	0	0	0	0	0	0	0	0	0	0
Bacteria(100);Proteobacteria(100);Alphaproteobacteria(100);Rhodospirillales(100);Acetobacteraceae(100);unclassified;unclassified;	KC756841	Asaia bogorensis strain FFMW 16S ribosomal RNA gene, partial sequence	Acetobacteraceae	H3QVG8203F47DI	Otu743	3	0	3	0	0	0	0	0	0	0	0	0	0	0	0	0	0	0	0	0	0	0	0	0	0	0	0	0	0	0	0	0	0	3	0	0	0	0	0	0	0	0	0	0
Bacteria(100);Actinobacteria(100);Actinobacteria(100);Actinomycetales(100);unclassified;unclassified;unclassified;	KF037498	Uncultured bacterium clone YZ604 16S ribosomal RNA gene, partial sequence	Actinomycetales	H3QVG8203GXWII	Otu744	7	0	7	0	0	0	0	0	0	0	0	0	0	0	0	0	0	0	0	0	0	0	0	0	0	0	0	0	0	0	0	0	0	7	0	0	0	0	0	0	0	0	0	0
Bacteria(100);Proteobacteria(100);Gammaproteobacteria(99);Xanthomonadales(97);Xanthomonadaceae(97);unclassified;unclassified;	JQ978910	Uncultured bacterium clone B-63 16S ribosomal RNA gene, partial sequence	Gammaproteobacteria	H3QVG8203GSV8N	Otu745	2	0	2	0	0	0	0	0	0	0	0	0	0	0	0	0	0	0	0	0	0	0	0	0	0	0	0	0	0	0	0	0	0	2	0	0	0	0	0	0	0	0	0	0
Bacteria(100);Proteobacteria(100);Alphaproteobacteria(100);Rhizobiales(100);unclassified;unclassified;unclassified;	KC607459	Uncultured bacterium clone CarbonSeq010_022210_F06 16S ribosomal RNA gene, partial sequence	Alphaproteobacteria	H3QVG8203G94A7	Otu746	6	0	3	0	3	0	0	0	0	0	0	0	0	0	0	0	0	0	0	0	0	0	0	0	0	0	0	0	0	0	0	0	0	3	0	0	0	0	0	0	0	2	0	1
Bacteria(100);Thermi(100);Deinococci(100);Thermales(100);Thermaceae(100);Thermus(100);unclassified(96);	KC873082	Uncultured bacterium clone S41_082 16S ribosomal RNA gene, partial sequence	other	H3QVG8203FLBZB	Otu747	3	0	2	0	1	0	0	0	0	0	0	0	0	0	0	0	0	0	0	0	0	0	0	0	0	0	0	0	0	0	0	0	0	2	0	0	0	0	0	0	0	0	0	0
Bacteria(100);Actinobacteria(100);Actinobacteria(100);Actinomycetales(100);Dermabacteraceae(96);unclassified;unclassified;	KC602244	Bacterium JP7 16S ribosomal RNA gene, partial sequence	Actinomycetales	H3QVG8203HFALG	Otu748	2	0	2	0	0	0	0	0	0	0	0	0	0	0	0	0	0	0	0	0	0	0	0	0	0	0	0	0	0	0	0	0	0	2	0	0	0	0	0	0	0	0	0	0
Bacteria(100);Firmicutes(100);Bacilli(100);Bacillales(100);unclassified;unclassified;unclassified;	JX861508	Melghirimyces sp. Nari11A 16S ribosomal RNA gene, partial sequence	Firmicutes	H3QVG8203GZKZ4	Otu749	9	0	9	0	0	0	0	0	0	0	0	0	0	0	0	0	0	0	0	0	0	0	0	0	0	0	5	0	0	0	0	0	0	4	0	0	0	0	0	0	0	0	0	0
Bacteria(100);Actinobacteria(100);Actinobacteria(100);Actinomycetales(100);Corynebacteriaceae(82);Corynebacterium(82);unclassified;	FR861745	Uncultured bacterium partial 16S rRNA gene, clone FQPV1RB13W64XC	Actinomycetales	H3QVG8203GJABF	Otu750	4	0	2	0	0	2	0	0	0	0	0	0	0	0	0	0	0	0	0	0	0	0	0	0	0	0	0	0	0	0	0	0	0	2	0	0	0	0	0	0	0	0	0	0
Bacteria(100);Bacteroidetes(100);Sphingobacteria(100);Sphingobacteriales(100);Cytophagaceae(100);Larkinella(100);unclassified;	JQ713788	Larkinella sp. DWV_RS1 16S ribosomal RNA gene, partial sequence	other	H3QVG8203G7T3R	Otu751	11	0	11	0	0	0	0	0	0	0	0	0	0	0	0	0	0	0	0	0	0	0	0	0	0	0	0	0	0	0	0	0	0	11	0	0	0	0	0	0	0	0	0	0
Bacteria(100);Proteobacteria(100);Alphaproteobacteria(100);Sphingomonadales(100);Erythrobacteraceae(90);Erythromicrobium(87);unclassified;	JQ701424	Uncultured Erythrobacteraceae bacterium clone Cont3_48 16S ribosomal RNA gene, partial sequence	Alphaproteobacteria	H3QVG8203G5W6Z	Otu752	3	0	3	0	0	0	0	0	0	0	0	0	0	0	0	0	0	0	0	0	0	0	0	0	0	0	0	0	2	0	0	0	0	0	1	0	0	0	0	0	0	0	0	0
Bacteria(100);Firmicutes(100);Clostridia(100);Clostridiales(100);unclassified;unclassified;unclassified;	KF002789	Thermoanaerobacterium thermosaccharolyticum strain TERI S7 16S ribosomal RNA gene, partial sequence	Firmicutes	H3QVG8203FO12I	Otu753	1	0	1	0	0	0	0	0	0	0	0	0	0	0	0	0	0	0	0	0	0	0	0	0	0	0	0	0	0	0	0	0	0	0	1	0	0	0	0	0	0	0	0	0
Bacteria(100);Actinobacteria(100);Actinobacteria(100);Actinomycetales(100);Pseudonocardiaceae(96);Saccharomonospora(92);Saccharomonospora_glauca(86);	HE966181	Uncultured bacterium partial 16S rRNA gene, clone WT42H81	Actinomycetales	ICM3C9K04JNY2U	Otu754	2	0	1	0	0	0	1	0	0	0	0	0	0	0	0	0	0	0	0	0	0	0	0	0	0	0	0	1	0	0	0	0	0	0	0	0	0	0	0	0	0	0	0	0
Bacteria(100);Firmicutes(100);Bacilli(100);Bacillales(100);unclassified;unclassified;unclassified;	JQ659929	Paenibacillus residui strain R8-313 16S ribosomal RNA gene, partial sequence	Firmicutes	ICM3C9K04JQE6B	Otu755	13	0	0	0	0	1	12	0	0	0	0	0	0	0	0	0	0	0	0	0	0	0	0	0	0	0	0	0	0	0	0	0	0	0	0	0	0	0	0	0	0	0	0	0
Bacteria(100);Firmicutes(100);Clostridia(100);Clostridiales(100);Clostridiales_Family_XI._Incertae_Sedis(100);Peptoniphilus(99);Peptoniphilus_asaccharolyticus(99);	HM076717	Uncultured Clostridiales bacterium clone VA16_52 16S ribosomal RNA gene, partial sequence	Firmicutes	ICM3C9K04JECLZ	Otu756	81	0	0	0	0	72	9	0	0	0	0	0	0	0	0	0	0	0	0	0	0	0	0	0	0	0	0	0	0	0	0	0	0	0	0	0	0	0	0	0	0	0	0	0
Bacteria(100);Proteobacteria(100);Alphaproteobacteria(100);Sphingomonadales(100);Erythrobacteraceae(84);unclassified;unclassified;	KC832947	Altererythrobacter sp. 4-24 16S ribosomal RNA gene, partial sequence	Alphaproteobacteria	ICM3C9K04JWR49	Otu757	6	0	4	0	0	0	2	0	0	0	0	0	0	0	0	0	0	0	0	0	0	0	0	0	0	0	4	0	0	0	0	0	0	0	0	0	0	0	0	0	0	0	0	0
Bacteria(100);Proteobacteria(100);Deltaproteobacteria(100);Myxococcales(100);Phaselicystidaceae(98);Phaselicystis(98);unclassified;	JN052298	Uncultured bacterium clone SymTree3-82 16S ribosomal RNA gene, partial sequence	other	ICM3C9K04INJG4	Otu758	1	0	0	0	0	0	1	0	0	0	0	0	0	0	0	0	0	0	0	0	0	0	0	0	0	0	0	0	0	0	0	0	0	0	0	0	0	0	0	0	0	0	0	0
Bacteria(100);Firmicutes(100);Bacilli(99);Bacillales(99);unclassified;unclassified;unclassified;	JQ659929	Paenibacillus residui strain R8-313 16S ribosomal RNA gene, partial sequence	Firmicutes	ICM3C9K04I2H6V	Otu759	2	0	0	0	0	0	2	0	0	0	0	0	0	0	0	0	0	0	0	0	0	0	0	0	0	0	0	0	0	0	0	0	0	0	0	0	0	0	0	0	0	0	0	0
Bacteria(100);Cyanobacteria(100);unclassified;unclassified;unclassified;unclassified;unclassified;	JQ402680	Uncultured cyanobacterium clone CNY_03101 16S ribosomal RNA gene, partial sequence	other	ICM3C9K04JC50N	Otu760	1	0	0	0	0	0	1	0	0	0	0	0	0	0	0	0	0	0	0	0	0	0	0	0	0	0	0	0	0	0	0	0	0	0	0	0	0	0	0	0	0	0	0	0
Bacteria(100);Actinobacteria(100);Actinobacteria(100);Actinomycetales(100);unclassified;unclassified;unclassified;	JQ377113	Uncultured bacterium clone NTS003FastKTS109038urunk00g5_11139 16S ribosomal RNA gene, partial sequence	Actinomycetales	ICM3C9K04IW764	Otu761	2	0	0	0	1	0	1	0	0	0	0	0	0	0	0	0	0	0	0	0	0	0	0	0	0	0	0	0	0	0	0	0	0	0	0	0	0	0	0	0	0	0	0	1
Bacteria(100);Proteobacteria(100);Alphaproteobacteria(100);Rhizobiales(100);Rhizobiaceae(95);Agrobacterium(95);unclassified(88);	KC843352	Rhizobium sp. 88 16S ribosomal RNA gene, partial sequence	Alphaproteobacteria	ICM3C9K04H334U	Otu762	1	0	0	0	0	0	1	0	0	0	0	0	0	0	0	0	0	0	0	0	0	0	0	0	0	0	0	0	0	0	0	0	0	0	0	0	0	0	0	0	0	0	0	0
Bacteria(100);Firmicutes(100);Bacilli(100);Bacillales(100);Paenibacillaceae(99);Paenibacillus(99);unclassified;	CP003422	Paenibacillus mucilaginosus K02, complete genome	Firmicutes	ICM3C9K04JF23V	Otu763	9	0	0	0	1	0	8	0	0	0	0	0	0	0	0	0	0	0	0	0	0	0	0	0	0	0	0	0	0	0	0	0	0	0	0	0	0	0	0	0	0	0	0	1
Bacteria(100);Proteobacteria(100);Alphaproteobacteria(100);Sphingomonadales(99);Sphingomonadaceae(93);Kaistobacter(83);unclassified(83);	HM274478	Uncultured bacterium clone ncd557f09c1 16S ribosomal RNA gene, partial sequence	Alphaproteobacteria	ICM3C9K04IVJLZ	Otu764	1	0	0	0	0	0	1	0	0	0	0	0	0	0	0	0	0	0	0	0	0	0	0	0	0	0	0	0	0	0	0	0	0	0	0	0	0	0	0	0	0	0	0	0
Bacteria(100);Actinobacteria(100);Actinobacteria(100);Actinomycetales(100);Intrasporangiaceae(81);unclassified;unclassified;	KC693690	Janibacter sp. A17 16S ribosomal RNA gene, partial sequence	Actinomycetales	ICM3C9K04JJEX3	Otu765	2	0	0	0	1	0	1	0	0	0	0	0	0	0	0	0	0	0	0	0	0	0	0	0	0	0	0	0	0	0	0	0	0	0	0	0	0	0	0	0	1	0	0	0
Bacteria(100);Firmicutes(100);Bacilli(97);Bacillales(97);unclassified;unclassified;unclassified;	JQ659929	Paenibacillus residui strain R8-313 16S ribosomal RNA gene, partial sequence	Firmicutes	ICM3C9K04H398V	Otu766	1	0	0	0	0	0	1	0	0	0	0	0	0	0	0	0	0	0	0	0	0	0	0	0	0	0	0	0	0	0	0	0	0	0	0	0	0	0	0	0	0	0	0	0
Bacteria(100);Actinobacteria(100);Actinobacteria(100);Actinomycetales(100);unclassified;unclassified;unclassified;	KF150489	Arthrobacter defluvii strain JN252 16S ribosomal RNA gene, partial sequence	Actinomycetales	ICM3C9K04IJ4XW	Otu767	1	0	0	0	0	0	1	0	0	0	0	0	0	0	0	0	0	0	0	0	0	0	0	0	0	0	0	0	0	0	0	0	0	0	0	0	0	0	0	0	0	0	0	0
Bacteria(100);Proteobacteria(100);Alphaproteobacteria(100);Rhodospirillales(100);Acetobacteraceae(100);Gluconobacter(92);unclassified(90);	AB819119	Gluconobacter frateurii gene for 16S ribosomal RNA, partial sequence, strain: SL13-8	Acetobacteraceae	ICM3C9K04ILT9F	Otu768	4	0	0	0	0	0	4	0	0	0	0	0	0	0	0	0	0	0	0	0	0	0	0	0	0	0	0	0	0	0	0	0	0	0	0	0	0	0	0	0	0	0	0	0
Bacteria(100);Actinobacteria(100);Actinobacteria(100);Actinomycetales(100);unclassified;unclassified;unclassified;	JX636506	Uncultured bacterium clone HA3ER6P01CV59H 16S ribosomal RNA gene, partial sequence	Actinomycetales	ICM3C9K04JZUU6	Otu769	1	0	0	0	0	0	1	0	0	0	0	0	0	0	0	0	0	0	0	0	0	0	0	0	0	0	0	0	0	0	0	0	0	0	0	0	0	0	0	0	0	0	0	0
Bacteria(100);Firmicutes(100);Bacilli(98);Bacillales(96);Alicyclobacillaceae(89);unclassified;unclassified;	HM438711	Uncultured bacterium clone D2CKBa71 16S ribosomal RNA gene, partial sequence	Firmicutes	ICM3C9K04IGT50	Otu770	3	0	2	0	0	0	1	0	0	0	0	0	0	0	0	0	0	0	0	0	0	0	0	0	0	0	2	0	0	0	0	0	0	0	0	0	0	0	0	0	0	0	0	0
Bacteria(100);Bacteroidetes(100);Bacteroidia(100);Bacteroidales(100);RikenellaceaeII(100);unclassified(100);unclassified(100);	EU771108	Uncultured bacterium clone AE2_aaa01f01 16S ribosomal RNA gene, partial sequence	other	ICM3C9K04JD40P	Otu771	1	0	0	0	0	0	1	0	0	0	0	0	0	0	0	0	0	0	0	0	0	0	0	0	0	0	0	0	0	0	0	0	0	0	0	0	0	0	0	0	0	0	0	0
Bacteria(100);Proteobacteria(100);Betaproteobacteria(98);Burkholderiales(94);unclassified;unclassified;unclassified;	JQ372511	Uncultured bacterium clone NT04b9_22311 16S ribosomal RNA gene, partial sequence	other	ICM3C9K04I5WY6	Otu772	1	0	0	0	0	0	1	0	0	0	0	0	0	0	0	0	0	0	0	0	0	0	0	0	0	0	0	0	0	0	0	0	0	0	0	0	0	0	0	0	0	0	0	0
Bacteria(100);Firmicutes(100);Bacilli(100);Lactobacillales(100);Leuconostocaceae(97);Fructobacillus(91);unclassified(91);	HE661018	Uncultured bacterium partial 16S rRNA gene, clone 4310	other	ICM3C9K04H4ZJ2	Otu773	8	0	0	0	0	1	7	0	0	0	0	0	0	0	0	0	0	0	0	0	0	0	0	0	0	0	0	0	0	0	0	0	0	0	0	0	0	0	0	0	0	0	0	0
Bacteria(100);Cyanobacteria(100);unclassified;unclassified;unclassified;unclassified;unclassified;	NR_102461	Crinalium epipsammum PCC 9333 strain PCC 9333 16S ribosomal RNA, complete sequence	other	ICM3C9K04ITPM9	Otu774	6	0	4	0	0	0	2	0	0	0	0	0	0	0	0	0	0	0	0	0	0	0	2	0	0	0	0	1	0	0	0	0	0	0	1	0	0	0	0	0	0	0	0	0
Bacteria(100);Actinobacteria(100);Actinobacteria(100);Actinomycetales(100);unclassified;unclassified;unclassified;	JF240552	Uncultured bacterium clone ncd2803g02c1 16S ribosomal RNA gene, partial sequence	Actinomycetales	ICM3C9K04IWRWO	Otu775	4	0	2	0	0	0	2	0	0	0	0	0	0	0	0	0	0	0	0	0	0	0	0	0	0	0	0	0	0	0	0	0	2	0	0	0	0	0	0	0	0	0	0	0
Bacteria(100);Actinobacteria(100);Actinobacteria(100);Solirubrobacterales(100);Solirubrobacteraceae(87);unclassified(87);unclassified(87);	JX523871	Uncultured bacterium clone 23C-Cima-Varnish 16S ribosomal RNA genes, partial sequence	other	ICM3C9K04H6CHV	Otu776	1	0	0	0	0	0	1	0	0	0	0	0	0	0	0	0	0	0	0	0	0	0	0	0	0	0	0	0	0	0	0	0	0	0	0	0	0	0	0	0	0	0	0	0
Bacteria(100);Planctomycetes(100);Planctomycea(100);Gemmatales(100);Isosphaeraceae(100);unclassified(93);unclassified(93);	JF198466	Uncultured bacterium clone ncd2314a04c1 16S ribosomal RNA gene, partial sequence	other	ICM3C9K04I4RU2	Otu777	1	0	0	0	0	0	1	0	0	0	0	0	0	0	0	0	0	0	0	0	0	0	0	0	0	0	0	0	0	0	0	0	0	0	0	0	0	0	0	0	0	0	0	0
Bacteria(100);Proteobacteria(100);Alphaproteobacteria(100);Rhodospirillales(100);Acetobacteraceae(100);Roseomonas(100);unclassified(99);	JQ383468	Uncultured bacterium clone NTS001Powerb10_7225 16S ribosomal RNA gene, partial sequence	Acetobacteraceae	ICM3C9K04IDTE4	Otu778	3	0	1	0	0	0	2	0	0	0	0	0	0	0	0	0	0	0	0	0	0	0	0	0	0	0	0	0	0	0	0	0	1	0	0	0	0	0	0	0	0	0	0	0
Bacteria(100);Firmicutes(100);Bacilli(100);Bacillales(100);unclassified;unclassified;unclassified;	JX897911	Brevibacillus sp. FBl11 16S ribosomal RNA gene, partial sequence	Firmicutes	ICM3C9K04I3GQ5	Otu779	24	0	0	0	0	0	24	0	0	0	0	0	0	0	0	0	0	0	0	0	0	0	0	0	0	0	0	0	0	0	0	0	0	0	0	0	0	0	0	0	0	0	0	0
Bacteria(100);Cyanobacteria(100);unclassified;unclassified;unclassified;unclassified;unclassified;	JX133481	Uncultured bacterium clone GZ119 16S ribosomal RNA gene, partial sequence	other	ICM3C9K04JEY00	Otu780	2	0	0	0	0	0	2	0	0	0	0	0	0	0	0	0	0	0	0	0	0	0	0	0	0	0	0	0	0	0	0	0	0	0	0	0	0	0	0	0	0	0	0	0
Bacteria(100);Proteobacteria(100);Alphaproteobacteria(98);Rhizobiales(92);unclassified;unclassified;unclassified;	JQ402933	Uncultured Microvirga sp. clone CNY_03427 16S ribosomal RNA gene, partial sequence	Alphaproteobacteria	ICM3C9K04H2Z1W	Otu781	3	0	1	0	0	1	1	0	0	0	0	0	0	0	0	0	0	0	0	0	0	1	0	0	0	0	0	0	0	0	0	0	0	0	0	0	0	0	0	0	0	0	0	0
Bacteria(100);Proteobacteria(100);Betaproteobacteria(100);Hydrogenophilales(100);Hydrogenophilaceae(100);Hydrogenophilus(100);unclassified(84);	KC763993	Uncultured bacterium clone EUIT077 16S ribosomal RNA gene, partial sequence	other	ICM3C9K03GTNS2	Otu782	2	0	0	0	0	2	0	0	0	0	0	0	0	0	0	0	0	0	0	0	0	0	0	0	0	0	0	0	0	0	0	0	0	0	0	0	0	0	0	0	0	0	0	0
Bacteria(100);Proteobacteria(100);Gammaproteobacteria(100);Chromatiales(100);Sinobacteraceae(100);Steroidobacter(100);unclassified(100);	JQ373694	Uncultured bacterium clone TE1a05c10_9482 16S ribosomal RNA gene, partial sequence	Gammaproteobacteria	ICM3C9K03GHF0V	Otu783	12	0	11	0	0	1	0	0	0	0	0	0	0	0	0	0	0	0	0	0	0	0	0	4	0	0	6	1	0	0	0	0	0	0	0	0	0	0	0	0	0	0	0	0
Bacteria(100);Firmicutes(100);Bacilli(100);Lactobacillales(98);Lactobacillaceae(97);Lactobacillus(97);Firm5(80);	.	.	Firm 5	ICM3C9K03FW03X	Otu784	2	0	0	0	0	2	0	0	0	0	0	0	0	0	0	0	0	0	0	0	0	0	0	0	0	0	0	0	0	0	0	0	0	0	0	0	0	0	0	0	0	0	0	0
Bacteria(100);Proteobacteria(100);Gammaproteobacteria(99);Enterobacteriales(96);Enterobacteriaceae(96);Arsenophonus(90);unclassified(90);	.	.	Enterobacteriaceae	ICM3C9K03FP1JC	Otu785	3	0	0	0	0	3	0	0	0	0	0	0	0	0	0	0	0	0	0	0	0	0	0	0	0	0	0	0	0	0	0	0	0	0	0	0	0	0	0	0	0	0	0	0
Bacteria(100);Proteobacteria(100);Gammaproteobacteria(100);Xanthomonadales(100);Xanthomonadaceae(100);Luteimonas(98);unclassified(98);	KC442380	Luteimonas sp. CH14C 16S ribosomal RNA gene, partial sequence	Gammaproteobacteria	ICM3C9K03HKMYN	Otu786	1	0	0	0	0	1	0	0	0	0	0	0	0	0	0	0	0	0	0	0	0	0	0	0	0	0	0	0	0	0	0	0	0	0	0	0	0	0	0	0	0	0	0	0
Bacteria(100);Proteobacteria(100);Gammaproteobacteria(99);Enterobacteriales(98);Enterobacteriaceae(98);unclassified;unclassified;	JN594908	Uncultured bacterium clone GG16f2_2-T7 16S ribosomal RNA gene, partial sequence	Enterobacteriaceae	ICM3C9K03F4K9R	Otu787	4	0	0	0	0	4	0	0	0	0	0	0	0	0	0	0	0	0	0	0	0	0	0	0	0	0	0	0	0	0	0	0	0	0	0	0	0	0	0	0	0	0	0	0
Bacteria(100);Firmicutes(100);Bacilli(100);Lactobacillales(100);Lactobacillaceae(86);Lactobacillus(83);unclassified;	AB810033	Lactobacillus sp. AcjLac12 gene for 16S ribosomal RNA, partial sequence	Lactobacillus sp.	ICM3C9K03FP2Q2	Otu788	1	0	0	0	0	1	0	0	0	0	0	0	0	0	0	0	0	0	0	0	0	0	0	0	0	0	0	0	0	0	0	0	0	0	0	0	0	0	0	0	0	0	0	0
Bacteria(100);Proteobacteria(100);Gammaproteobacteria(100);Pseudomonadales(98);unclassified;unclassified;unclassified;	GQ009427	Uncultured bacterium clone nbw776d11c1 16S ribosomal RNA gene, partial sequence	Gammaproteobacteria	ICM3C9K03F7HB3	Otu789	2	0	0	0	0	2	0	0	0	0	0	0	0	0	0	0	0	0	0	0	0	0	0	0	0	0	0	0	0	0	0	0	0	0	0	0	0	0	0	0	0	0	0	0
Bacteria(100);Tenericutes(100);Mollicutes(100);Entomoplasmatales(100);Spiroplasmataceae(100);Spiroplasma(100);unclassified(83);	CP005078	Spiroplasma syrphidicola EA-1, complete genome	other	ICM3C9K03G27L6	Otu790	22	0	0	0	0	22	0	0	0	0	0	0	0	0	0	0	0	0	0	0	0	0	0	0	0	0	0	0	0	0	0	0	0	0	0	0	0	0	0	0	0	0	0	0
Bacteria(100);WPS-2(100);unclassified(100);unclassified(100);unclassified(100);unclassified(100);unclassified(100);	JN178470	Uncultured bacterium clone TX2_6E17 16S ribosomal RNA gene, partial sequence	other	ICM3C9K03GO042	Otu791	3	0	0	0	0	3	0	0	0	0	0	0	0	0	0	0	0	0	0	0	0	0	0	0	0	0	0	0	0	0	0	0	0	0	0	0	0	0	0	0	0	0	0	0
Bacteria(100);Proteobacteria(100);Alphaproteobacteria(97);Rhizobiales(95);unclassified;unclassified;unclassified;	KC355318	Rhizobium huautlense strain KUDC1811 16S ribosomal RNA gene, partial sequence	Alphaproteobacteria	ICM3C9K03GM4ZS	Otu792	2	0	0	0	1	1	0	0	0	0	0	0	0	0	0	0	0	0	0	0	0	0	0	0	0	0	0	0	0	0	0	0	0	0	0	0	0	0	0	1	0	0	0	0
Bacteria(100);Firmicutes(100);Bacilli(100);Bacillales(100);unclassified;unclassified;unclassified;	KC172217	Uncultured bacterium clone DM2-116 16S ribosomal RNA gene, partial sequence	Firmicutes	ICM3C9K03GOZGO	Otu793	16	0	15	0	0	1	0	0	0	0	0	0	0	0	0	0	0	0	0	0	0	0	0	0	0	0	9	0	0	0	0	2	4	0	0	0	0	0	0	0	0	0	0	0
Bacteria(100);Firmicutes(100);Clostridia(100);Clostridiales(100);unclassified;unclassified;unclassified;	HQ798870	Uncultured organism clone ELU0143-T325-S-NIPCRAMgANa_000185 small subunit ribosomal RNA gene, partial sequence	Firmicutes	ICM3C9K03FWB7X	Otu794	3	0	0	0	0	3	0	0	0	0	0	0	0	0	0	0	0	0	0	0	0	0	0	0	0	0	0	0	0	0	0	0	0	0	0	0	0	0	0	0	0	0	0	0
Bacteria(100);Proteobacteria(100);Alphaproteobacteria(100);Rhizobiales(100);Hyphomicrobiaceae(84);Rhodoplanes(84);Rhodoplanes_elegans(84);	JQ386582	Uncultured bacterium clone TE2a05e9_6332 16S ribosomal RNA gene, partial sequence	Alphaproteobacteria	ICM3C9K03FX7CE	Otu795	2	0	0	0	0	2	0	0	0	0	0	0	0	0	0	0	0	0	0	0	0	0	0	0	0	0	0	0	0	0	0	0	0	0	0	0	0	0	0	0	0	0	0	0
Bacteria(100);Proteobacteria(100);Alphaproteobacteria(99);Rhizobiales(91);unclassified;unclassified;unclassified;	JQ358409	Uncultured bacterium clone SSD44_H02 16S ribosomal RNA gene, partial sequence	Alphaproteobacteria	ICM3C9K03F5GE1	Otu796	1	0	0	0	0	1	0	0	0	0	0	0	0	0	0	0	0	0	0	0	0	0	0	0	0	0	0	0	0	0	0	0	0	0	0	0	0	0	0	0	0	0	0	0
Bacteria(100);Actinobacteria(100);Actinobacteria(100);Actinomycetales(100);Intrasporangiaceae(99);unclassified;unclassified;	KC554448	Uncultured bacterium clone 8-586 16S ribosomal RNA gene, partial sequence	Actinomycetales	ICM3C9K03FXBXC	Otu797	2	0	1	0	0	1	0	0	0	0	0	0	0	0	0	0	0	0	0	0	0	0	0	0	0	0	1	0	0	0	0	0	0	0	0	0	0	0	0	0	0	0	0	0
Bacteria(100);Proteobacteria(100);Gammaproteobacteria(100);Aeromonadales(85);Aeromonadaceae(85);Aeromonas(85);unclassified(85);	KC734307	Bacterium S448 16S ribosomal RNA gene, partial sequence	Gammaproteobacteria	ICM3C9K03F1F59	Otu798	1	0	0	0	0	1	0	0	0	0	0	0	0	0	0	0	0	0	0	0	0	0	0	0	0	0	0	0	0	0	0	0	0	0	0	0	0	0	0	0	0	0	0	0
Bacteria(100);Proteobacteria(100);Alphaproteobacteria(97);Rhodospirillales(97);Acetobacteraceae(97);Roseomonas(87);unclassified(86);	JQ300524	Uncultured bacterium clone BANA-55 16S ribosomal RNA gene, partial sequence	Alphaproteobacteria	ICM3C9K03GW52G	Otu799	1	0	0	0	0	1	0	0	0	0	0	0	0	0	0	0	0	0	0	0	0	0	0	0	0	0	0	0	0	0	0	0	0	0	0	0	0	0	0	0	0	0	0	0
Bacteria(100);Proteobacteria(100);Alphaproteobacteria(100);Rhodobacterales(99);Rhodobacteraceae(99);unclassified;unclassified;	JX844452	Oceanicola sp. Ar-45 16S ribosomal RNA gene, partial sequence	Alphaproteobacteria	ICM3C9K03GKVBQ	Otu800	5	0	4	0	0	1	0	0	0	0	0	0	0	0	0	0	0	0	0	0	0	0	0	0	0	0	0	0	4	0	0	0	0	0	0	0	0	0	0	0	0	0	0	0
Bacteria(100);Actinobacteria(100);Actinobacteria(100);Actinomycetales(100);Actinomycetaceae(100);Varibaculum(100);Varibaculum_cambriense(100);	JF141033	Uncultured bacterium clone ncd1704d07c1 16S ribosomal RNA gene, partial sequence	Actinomycetales	ICM3C9K03GT9AN	Otu801	1	0	0	0	0	1	0	0	0	0	0	0	0	0	0	0	0	0	0	0	0	0	0	0	0	0	0	0	0	0	0	0	0	0	0	0	0	0	0	0	0	0	0	0
Bacteria(100);Proteobacteria(100);Alphaproteobacteria(97);Rhizobiales(94);Bartonellaceae(93);Bartonella(93);Alpha1(88);	HE661027	Uncultured bacterium partial 16S rRNA gene, clone 4528	Alpha 1	ICM3C9K03GA489	Otu802	1	0	0	0	0	1	0	0	0	0	0	0	0	0	0	0	0	0	0	0	0	0	0	0	0	0	0	0	0	0	0	0	0	0	0	0	0	0	0	0	0	0	0	0
Bacteria(100);Firmicutes(100);Clostridia(100);Clostridiales(100);Clostridiales_Family_XI._Incertae_Sedis(97);unclassified(89);unclassified(89);	KF007171	Clostridiales bacterium S9 HS-16 16S ribosomal RNA gene, partial sequence	Firmicutes	ICM3C9K03FVECZ	Otu803	1	0	0	0	0	1	0	0	0	0	0	0	0	0	0	0	0	0	0	0	0	0	0	0	0	0	0	0	0	0	0	0	0	0	0	0	0	0	0	0	0	0	0	0
Bacteria(100);TM7(100);TM7-1(98);unclassified(98);unclassified(98);unclassified(98);unclassified(98);	KC432483	Uncultured bacterium clone SEAD1DG011 16S ribosomal RNA gene, partial sequence	other	ICM3C9K03G3D79	Otu804	1	0	0	0	0	1	0	0	0	0	0	0	0	0	0	0	0	0	0	0	0	0	0	0	0	0	0	0	0	0	0	0	0	0	0	0	0	0	0	0	0	0	0	0
Bacteria(100);Firmicutes(100);Bacilli(99);Bacillales(99);unclassified;unclassified;unclassified;	JN846787	Uncultured bacterium clone PBC006 16S ribosomal RNA gene, partial sequence	Firmicutes	ICM3C9K03GZ1P2	Otu805	1	0	0	0	0	1	0	0	0	0	0	0	0	0	0	0	0	0	0	0	0	0	0	0	0	0	0	0	0	0	0	0	0	0	0	0	0	0	0	0	0	0	0	0
Bacteria(100);Actinobacteria(100);Actinobacteria(100);Actinomycetales(100);Micrococcaceae(96);Kocuria(84);unclassified;	KC581674	Kocuria kristinae strain IARI-ABL-31 16S ribosomal RNA gene, partial sequence	Actinomycetales	ICM3C9K03F1CZX	Otu806	2	0	1	0	0	1	0	0	0	0	0	0	0	0	0	0	0	0	0	0	0	0	0	1	0	0	0	0	0	0	0	0	0	0	0	0	0	0	0	0	0	0	0	0
Bacteria(100);Bacteroidetes(100);unclassified;unclassified;unclassified;unclassified;unclassified;	JQ400894	Uncultured Sphingobacteriales bacterium clone CNY_00826 16S ribosomal RNA gene, partial sequence	other	ICM3C9K03FON8V	Otu807	1	0	0	0	0	1	0	0	0	0	0	0	0	0	0	0	0	0	0	0	0	0	0	0	0	0	0	0	0	0	0	0	0	0	0	0	0	0	0	0	0	0	0	0
Bacteria(100);Proteobacteria(100);Alphaproteobacteria(100);Rhodobacterales(100);Rhodobacteraceae(100);Paracoccus(98);unclassified;	JX635531	Uncultured bacterium clone HA3ER6P01A7L94 16S ribosomal RNA gene, partial sequence	Alphaproteobacteria	ICM3C9K03GNWGA	Otu808	53	0	33	0	5	15	0	0	0	0	0	0	0	0	0	0	0	0	0	0	0	0	1	0	0	1	6	4	0	2	8	0	8	3	0	0	0	0	0	0	0	0	0	5
Bacteria(100);Proteobacteria(100);Gammaproteobacteria(100);Xanthomonadales(100);Xanthomonadaceae(100);Lysobacter(80);unclassified(80);	JQ426296	Uncultured bacterium clone AN0C1CE09 16S ribosomal RNA gene, partial sequence	Gammaproteobacteria	ICM3C9K03G4G1R	Otu809	11	0	8	0	1	2	0	0	0	0	0	0	0	0	0	0	0	0	0	0	0	0	0	0	0	0	0	0	0	0	2	0	3	3	0	0	0	0	0	0	0	0	0	0
Bacteria(100);Bacteroidetes(100);Flavobacteria(100);Flavobacteriales(100);Flavobacteriaceae(100);unclassified;unclassified;	KF228165	Flavobacterium cucumis clone G9-0AF4J_11038 16S ribosomal RNA gene, partial sequence	other	ICM3C9K03FU1WW	Otu810	1	0	0	0	0	1	0	0	0	0	0	0	0	0	0	0	0	0	0	0	0	0	0	0	0	0	0	0	0	0	0	0	0	0	0	0	0	0	0	0	0	0	0	0
Bacteria(100);TM6(100);SJA-4(98);unclassified(98);unclassified(98);unclassified(98);unclassified(98);	.	.	other	ICM3C9K03FV0ET	Otu811	3	0	0	0	0	3	0	0	0	0	0	0	0	0	0	0	0	0	0	0	0	0	0	0	0	0	0	0	0	0	0	0	0	0	0	0	0	0	0	0	0	0	0	0
Bacteria(100);Proteobacteria(100);Alphaproteobacteria(98);Rhodospirillales(98);Acetobacteraceae(98);Alpha2.2(84);unclassified;	.	.	Alpha 2.2	ICM3C9K03G173F	Otu812	1	0	0	0	0	1	0	0	0	0	0	0	0	0	0	0	0	0	0	0	0	0	0	0	0	0	0	0	0	0	0	0	0	0	0	0	0	0	0	0	0	0	0	0
					total sequences	593360	191037	33284	163468	5428	195264	4879	21274	10274	9670	57	28032	8221	12178	13361	15436	8170	15856	21845	12514	14149	425	327	2388	1191	1710	3392	5992	3590	910	1180	193	1436	10459	91	478	439	260	1	594	204	394	61	1160
[truncated: 47 more columns]
